# Supplementary material for: Indolo[2,3-e]benzazocines and indolo[2,3-f]benzazonines and their copper(ii) complexes as microtubule destabilizing agents
Source: Royal Society of Chemistry journal article supplement (doi:10.1039/d3dt01632c), 2023-01-01
Supplement: d3dt01632c1.pdf [file d3dt01632c1.pdf]

**Electronic Supporting Information**

**for**

**Indolo[2,3-*e*]benzazocines and indolo[2,3-*f*]benzazonines and their copper(II) complexes as  
microtubule destabilizing agents**

**Christopher Wittmann,<sup>a</sup> Orsolya Dömötör,<sup>b</sup> Irina Kuznetcova,<sup>a</sup> Gabriella Spengler,<sup>b,c</sup>  
Jóhannes Reynisson,<sup>d</sup> Lauren Holder,<sup>d</sup> Gavin J. Miller,<sup>d</sup> Eva A. Enyedy,<sup>b</sup> Ruoli Bai,<sup>e</sup> Ernest  
Hamel<sup>e</sup> and Vladimir B. Arion<sup>a\*</sup>**

<sup>a</sup> Institute of Inorganic Chemistry, University of Vienna, Währinger Strasse 42, A-1090 Vienna, Austria

<sup>b</sup> MTA-SZTE Lendület Functional Metal Complexes Research Group, Department of Inorganic and Analytical Chemistry, University of Szeged, Dóm tér 7, H-6720 Szeged, Hungary

<sup>c</sup> Department of Medical Microbiology, Albert Szent-Györgyi Health Center and Albert Szent-Györgyi Medical School, University of Szeged, Semmelweis u. 6, H-6725 Szeged, Hungary

<sup>d</sup>School of Chemical Sciences and School of Pharmacy and Bioengineering, Keele University, Staffordshire, ST5 5BG, United Kingdom

<sup>e</sup>Molecular Pharmacology Branch, Developmental Therapeutics Program, Division of Cancer Diagnosis and Treatment, National Cancer Institute, Frederick National Laboratory for Cancer Research, National Institutes of Health, Frederick, Maryland 21702, United States

## Contents

|                                                                                                                                     |     |
|-------------------------------------------------------------------------------------------------------------------------------------|-----|
| • NMR atom numbering schemes .....                                                                                                  | S4  |
| • Synthesis of 3-(2-iodophenyl)propanamine .....                                                                                    | S4  |
| ○ 2-(2-iodophenyl)ethanol ( <b>X1</b> ).....                                                                                        | S4  |
| ○ 2-(2-iodophenyl)ethyl methanesulfonate ( <b>X2</b> ) .....                                                                        | S4  |
| ○ 3-(2-iodophenyl)propionitrile ( <b>X3</b> ).....                                                                                  | S5  |
| ○ 3-(2-iodophenyl)propanamine ( <b>X4</b> ).....                                                                                    | S5  |
| • Synthesis of Building Blocks VIIa, VIIb, VIIc and VIId.....                                                                       | S5  |
| ○ <i>N</i> -(2-iodophenethyl)-5-bromo-1-(ethoxymethyl)-1 <i>H</i> -indole-2-carboxamide ( <b>IIb</b> in Scheme 1) .....             | S5  |
| ○ <i>N</i> -(2-iodophenylpropyl)-5-bromo-1-(ethoxymethyl)-1 <i>H</i> -indole-2-carboxamide ( <b>IIId</b> in Scheme 1) .....         | S6  |
| ○ <i>tert</i> -Butyl (2-iodophenethyl)(1-(ethoxymethyl)-1 <i>H</i> -indole-2-carbonyl)carbamate ( <b>IIIb</b> in Scheme 1) .....    | S6  |
| ○ <i>tert</i> -Butyl (2-iodophenylpropyl)(1-(ethoxymethyl)-1 <i>H</i> -indole-2-carbonyl)carbamate ( <b>IIIId</b> in Scheme 1)..... | S7  |
| ○ <i>tert</i> -Butyl 12-bromo-9-(ethoxymethyl)-5,6-dihydroindolo[2,3- <i>e</i> ][3]benzazocin-8-one ( <b>IVb</b> in Scheme 1).....  | S7  |
| ○ <i>tert</i> -Butyl 13-bromo-10-(ethoxymethyl)-5,6-dihydroindolo[2,3- <i>e</i> ][4]benzazonin-9-one ( <b>IVd</b> in Scheme 1)..... | S8  |
| ○ 12-Bromo-5,6,7,9-tetrahydroindolo[2,3- <i>e</i> ][3]benzazocin-8( <i>7H</i> )-one ( <b>Vb</b> in Scheme 1) .....                  | S8  |
| ○ 13-Bromo-5,6,7,10-tetrahydroindolo[2,3- <i>f</i> ][4]benzazonin-9( <i>8H</i> )-one ( <b>Vd</b> in Scheme 1) .....                 | S9  |
| ○ 5,6,7,9-tetrahydroindolo[2,3- <i>e</i> ]benzazocin-8-thione ( <b>VIa</b> in Scheme 2) .....                                       | S9  |
| ○ 12-Bromo-5,6,7,9-tetrahydroindolo[2,3- <i>e</i> ]benzazocin-8-thione ( <b>VIb</b> in Scheme 2) .....                              | S9  |
| ○ 5,6,7,10-tetrahydroindolo[2,3- <i>f</i> ]benzazonin-9-thione ( <b>VIc</b> in Scheme 2).....                                       | S10 |
| ○ 13-Bromo-5,6,7,10-tetrahydroindolo[2,3- <i>f</i> ]benzazonin-9-thione ( <b>VIId</b> in Scheme 2).....                             | S10 |
| ○ 8-Hydrazin-yl-5,6,7,9-tetrahydroindolo[2,3- <i>e</i> ]benzazocine ( <b>VIIa</b> in Scheme 2) .....                                | S10 |
| ○ 12-Bromo-8-hydrazin-yl-5,6,7,9-tetrahydroindolo[2,3- <i>e</i> ]benzazocine ( <b>VIIb</b> in Scheme 2) .....                       | S11 |
| ○ 9-Hydrazin-yl-5,6,7,10-tetrahydroindolo[2,3- <i>f</i> ]benzazonine ( <b>VIIc</b> in Scheme 2) .....                               | S11 |
| ○ 13-Bromo-9-hydrazin-yl-5,6,7,10-tetrahydroindolo[2,3- <i>f</i> ]benzazonine ( <b>VIIId</b> in Scheme 2) .....                     | S11 |

- Structural Conformation Details.....S12
- Molecular Docking Calculations .....S13
- Yields, Elemental Analysis and ESI MS data .....S17
- Additional X-ray Diffraction Data .....S20
- Crystallographic Data Collection .....S24
- UV–vis data .....S26
- NMR spectra.....S29
- ESI mass spectra.....S45
- References .....S71

- NMR atom numbering schemes

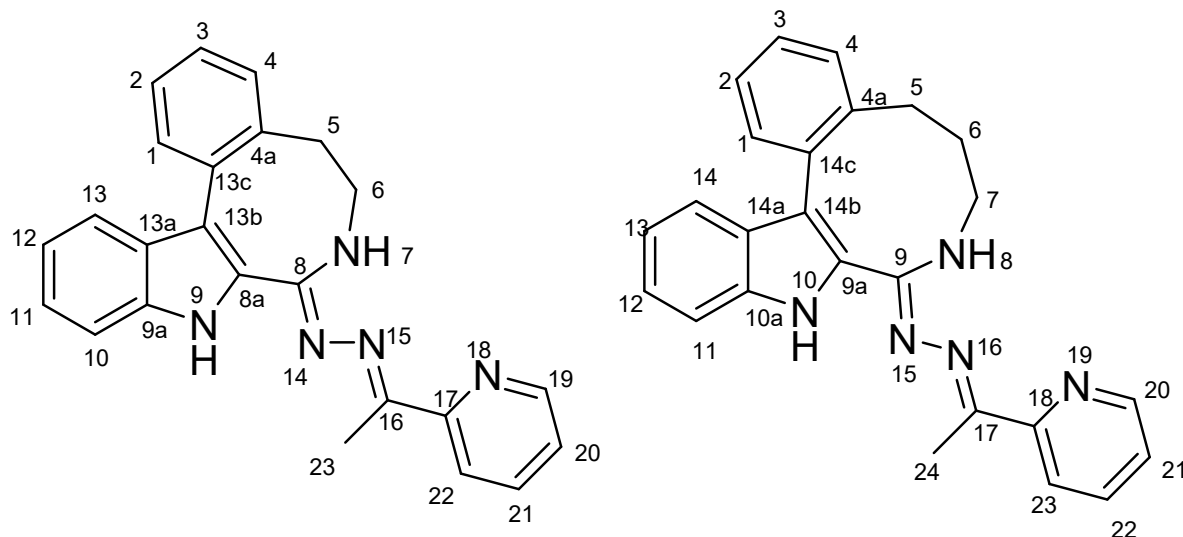

**Scheme S1.** Atom numbering schemes for ligands based on indolo[2,3-*e*][3]benzazocin-8(7*H*)-ones (left) and indolo[2,3-*f*][4]benzazonin-9(8*H*)-ones (right).

- Synthesis of 3-(2-iodophenyl)propanamine

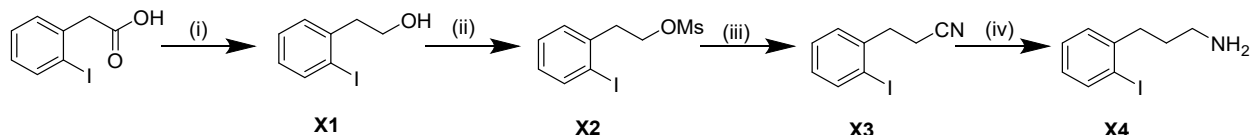

**Scheme S2.** Synthesis of 3-(2-iodophenyl)propan-1-amine **X4**. Reagents and conditions: (i): DIBAL-H, THF<sub>dry</sub>, -80 °C - rt, 1 h; (ii): MsCl, NEt<sub>3</sub>, DCM<sub>dry</sub>, 0 °C - rt, 2 h; (iii): KCN, DMSO, 60 °C, 18 h; (iv): AlCl<sub>3</sub>, LiAlH<sub>4</sub>, Et<sub>2</sub>O<sub>abs</sub>, -21 °C - 0 °C, 1h.

- 2-(2-iodophenyl)ethanol (**X1**)

Under argon atmosphere, 2-iodophenyl acetic acid (5 g, 19.08 mmol) was dissolved in dry THF (240 mL). The solution was cooled to -80 °C and DIBAL-H (52.5 mL, 1.2 M in toluene) was added dropwise. The reaction mixture was stirred at room temperature for 1 h. After cooling to -21 °C 1 M NaOH (25 mL) was added. The THF fraction was dried over magnesium sulfate and concentrated *in vacuo*. The crude oil was purified on silica by using hexane : ethyl acetate 7:3 to give a colourless oil. Yield: 4.48 g, 95%. <sup>1</sup>H NMR (500 MHz, DMSO-*d*<sub>6</sub>) δ 7.81 (d, *J* = 7.8 Hz, 1H), 7.34 – 7.30 (m, 2H), 6.98 – 6.92 (m, 1H), 4.75 (t, *J* = 5.2 Hz, 1H), 3.56 (td, *J* = 7.2, 5.3 Hz, 2H), 2.83 (t, *J* = 7.2 Hz, 2H).

- 2-(2-iodophenyl)ethyl methanesulfonate (**X2**)

Under argon atmosphere, to a solution of **X1** (4.48 g, 18.05 mmol) in dry DCM (60 mL) cooled to 0 °C, triethylamine (3.7 mL, 27.07 mmol) was added. After 20 min

mesyl chloride (1.67 mL, 21.66 mmol) was added carefully, the resulting suspension stirred at room temperature for 2 h and then poured onto ice (80 g). The organic phase was separated and washed with saturated sodium hydrogencarbonate solution (100 mL). The DCM phase was dried over magnesium sulfate and concentrated *in vacuo* to give a colourless oil. Yield. 5.88 g. 99%. <sup>1</sup>H NMR (500 MHz, DMSO-*d*<sub>6</sub>) δ 7.87 (d, *J* = 7.8 Hz, 1H), 7.38 (dd, *J* = 7.8, 5.4 Hz, 2H), 7.05 – 6.99 (m, 1H), 4.38 (t, *J* = 6.9 Hz, 2H), 3.14 (s, 3H), 3.11 (t, *J* = 6.9 Hz, 2H).

○ *3-(2-iodophenyl)propionitrile (X3)*

To a solution of **X2** (5.07g, 15.5 mmol) in DMSO (60 mL) at 60 °C KCN (2.00 g, 31 mmol) was added, and the resulting suspension was stirred at 60 °C overnight. The suspension was poured into saturated NaHCO<sub>3</sub> solution (100 mL) and extracted with DCM (2 × 100 mL). The combined organic phases were washed with water (150 mL) and dried over magnesium sulfate. The crude oil was purified on silica by using hexane : ethyl acetate 9:1 to give a colourless oil. Yield: 3.41 g. 85%. <sup>1</sup>H NMR (500 MHz, DMSO-*d*<sub>6</sub>) δ 7.87 (d, *J* = 7.8 Hz, 1H), 7.42 – 7.36 (m, 2H), 7.06 – 6.99 (m, 1H), 2.98 (t, *J* = 7.3 Hz, 2H), 2.80 (t, *J* = 7.3 Hz, 2H).

○ *3-(2-iodophenyl)propanamine (X4)*

Under argon atmosphere, at –21 °C AlCl<sub>3</sub> (1.85 g, 13.84 mmol) and LiAlH<sub>4</sub> (18 mL, 1 M in THF, 1.3 eq) were carefully suspended in freshly distilled Et<sub>2</sub>O (60 mL). A solution of **X3** (3.56 g, 13.8 mmol) in freshly distilled Et<sub>2</sub>O (30 mL) was added dropwise to the suspension. The mixture was stirred at 0 °C for 1 h and quenched carefully with 4 M NaOH (16 mL). The resulting suspension was dried over magnesium sulfate and concentrated *in vacuo* to give a colourless oil. Yield: 2.91 g, 80 %. <sup>1</sup>H NMR (500 MHz, DMSO-*d*<sub>6</sub>) δ 7.85 – 7.76 (m, 1H), 7.37 – 7.25 (m, 2H), 6.92 (tt, *J* = 26.0, 13.0 Hz, 1H), 2.66 (dd, *J* = 17.0, 9.1 Hz, 2H), 2.57 (t, *J* = 6.9 Hz, 2H), 1.63 – 1.54 (m, 2H), two proton signals are likely overlapping with solvent molecules. ESI-MS (acetonitrile/methanol + 1% water), positive: *m/z* 261.98 [M + H]<sup>+</sup> (calcd *m/z* for [C<sub>9</sub>H<sub>12</sub>NI + H]<sup>+</sup> 262.01).

• Synthesis of Building Blocks VIIa, VIIb, VIIc and VIId

**Va** and carboxylic acids **Ia** and **Ib** were prepared according to literature protocols.<sup>1</sup> Herein 2-(2-bromophenyl)ethyl-1-amine was used instead of 2-(2-iodophenyl)ethyl-1-amine, and this resulted in no changes.

○ *N-(2-iodophenethyl)-5-bromo-1-(ethoxymethyl)-1H-indole-2-carboxamide (IIb in Scheme 1)*

Under argon atmosphere, to a solution of 2-(2-iodophenyl)ethan-1-amine (3.6 g, 14.6 mmol) in DCM (150 mL) cooled to 0 °C **Ib** (4.32 g, 13.2 mmol) was added, followed by EDCI·HCl (2.79 g, 14.6 mmol) and DMAP (1.62 g, 13.2 mmol). The reaction mixture was stirred for at 0 °C for 4

h and at room temperature overnight. Then water (40 mL) was added, and the solution was acidified with 6 M HCl to pH 1. After separation of the phases, the product was extracted with DCM (2 × 40 mL). The combined organic phases were dried over magnesium sulfate and concentrated *in vacuo*. The remainder was washed with ice cold ether (40 mL) to give a white solid. Yield: 6.54 g, 94%. <sup>1</sup>H NMR (500 MHz, DMSO-*d*<sub>6</sub>) δ 8.79 (t, *J* = 5.7 Hz, 1H), 7.90 (d, *J* = 1.9 Hz, 1H), 7.85 (d, *J* = 7.6 Hz, 1H), 7.61 (d, *J* = 8.8 Hz, 1H), 7.41 (dd, *J* = 8.8, 2.0 Hz, 1H), 7.36 – 7.30 (m, 2H), 7.06 (s, 1H), 7.01 – 6.95 (m, 1H), 5.95 (s, 2H), 3.50 (dd, *J* = 13.0, 6.9 Hz, 2H), 3.31 (d, *J* = 7.0 Hz, 2H), 2.97 (dd, *J* = 13.3, 6.2 Hz, 2H), 0.98 (t, *J* = 7.0 Hz, 3H).

- *N*-(2-iodophenylpropyl)-5-bromo-1-(ethoxymethyl)-1H-indole-2-carboxamide (**IIId** in Scheme 1)

Under argon atmosphere, to a solution of **X4** (2.9 g, 11.1 mmol) in DCM (75 mL) cooled to 0 °C **Ib** (2.52 g, 10.1 mmol) was added, followed by EDCI·HCl (2.14 g, 11.1 mmol) and DMAP (1.24 g, 10.1 mmol). The reaction mixture was stirred at 0 °C for 4 h and at room temperature overnight. Then water (45 mL) was added, and the solution was acidified with 6 M HCl to pH 1. After the separation of the phases, the product was extracted with DCM (2 × 50 mL). The combined organic phases were dried over magnesium sulfate and concentrated *in vacuo*. The remainder was washed with ice cold diethyl ether (40 mL) to give a white solid. Yield: 4.39 g, 80%. <sup>1</sup>H NMR (500 MHz, DMSO-*d*<sub>6</sub>) δ 8.76 (t, *J* = 5.5 Hz, 1H), 7.90 (d, *J* = 1.8 Hz, 1H), 7.83 (d, *J* = 7.8 Hz, 1H), 7.61 (d, *J* = 8.8 Hz, 1H), 7.40 (dd, *J* = 8.8, 1.9 Hz, 1H), 7.37 – 7.32 (m, 2H), 7.09 (s, 1H), 6.98 – 6.92 (m, 1H), 5.96 (s, 2H), 2.76 – 2.70 (m, 2H), 1.83 – 1.75 (m, 2H), 0.98 (t, *J* = 7.0 Hz, 3H), Four proton signals are likely overlapping with solvent molecules. ESI-MS (acetonitrile/methanol + 1% water), negative: *m/z* 541.00 [M-H]<sup>-</sup> (calcd *m/z* for [C<sub>21</sub>H<sub>21</sub>BrIN<sub>2</sub>O<sub>2</sub>]<sup>-</sup> 540.96).

- *tert*-Butyl (2-iodophenethyl)(1-(ethoxymethyl)-1H-indole-2-carbonyl)carbamate (**IIIb** in Scheme 1)

Under argon atmosphere, to a solution of **Ib** (6.54 g, 12.4 mmol) in dry acetonitrile (120 mL) Boc<sub>2</sub>O (4.33 g, 19.8 mmol) and a catalytic amount of DMAP were added. The orange solution was stirred at room temperature for 18 h. The solvent was evaporated and the residue partitioned between water and DCM 1:1 (80 mL). The aqueous layer was further extracted with DCM (2 × 80 mL). The combined organic layers were dried over magnesium sulfate. The product was purified on silica by using hexane/ethyl acetate 85:15 as eluent to give a viscous oil. Yield: 7.54 g, 97%.

<sup>1</sup>H NMR (500 MHz, DMSO-*d*<sub>6</sub>) δ 7.87 (d, *J* = 1.8 Hz, 1H), 7.83 (dd, *J* = 7.8, 0.7 Hz, 1H), 7.65 (d, *J* = 8.9 Hz, 1H), 7.43 (dd, *J* = 8.8, 1.9 Hz, 1H), 7.37 – 7.31 (m, 1H), 7.29 (dd, *J* = 7.6, 1.5 Hz, 1H), 6.98 (td, *J* = 7.7, 1.7 Hz, 1H), 6.74 (s, 1H), 5.67 (s, 2H), 3.99 (t, *J* = 7.1 Hz, 2H), 3.43 – 3.38 (m, 2H), 3.09 (t, *J* = 6.9 Hz, 2H), 1.08 – 1.02 (m, 12H). ESI-MS (acetonitrile/methanol + 1% water), positive: *m/z* 651.07 [M+Na]<sup>+</sup> (calcd *m/z* for [C<sub>25</sub>H<sub>28</sub>BrIN<sub>2</sub>NaO<sub>4</sub>]<sup>+</sup> 651.02).

- *tert*-Butyl (2-iodophenylpropyl)(1-(ethoxymethyl)-1*H*-indole-2-carbonyl)carbamate (**III**d in Scheme 1)

Under argon atmosphere, to a solution of **III**d (1.68 g, 3.1 mmol) in dry acetonitrile (30 mL) Boc<sub>2</sub>O (1.08 g, 5 mmol) and a catalytic amount of DMAP were added. The orange solution was stirred at room temperature for 18 h. The solvent was evaporated and the remainder partitioned between water and DCM (100 mL each). The aqueous layer was further extracted with DCM (2 × 50 mL). The combined organic layers were dried over magnesium sulfate. The product was purified on silica by using hexane/ethyl acetate 88:12 as eluent to give a viscous oil. Yield: 1.84 g, 92%. <sup>1</sup>H NMR (500 MHz, DMSO-*d*<sub>6</sub>) δ 7.90 (d, *J* = 1.9 Hz, 1H), 7.83 (d, *J* = 7.7 Hz, 1H), 7.66 (d, *J* = 8.9 Hz, 1H), 7.44 (dd, *J* = 8.8, 2.0 Hz, 1H), 7.37 – 7.34 (m, 2H), 6.97 (ddd, *J* = 8.0, 5.6, 3.5 Hz, 1H), 6.87 (s, 1H), 5.70 (s, 2H), 3.80 (t, *J* = 7.1 Hz, 2H), 3.42 (q, *J* = 7.0 Hz, 2H), 2.78 – 2.71 (m, 2H), 1.87 (dt, *J* = 15.1, 7.7 Hz, 2H), 1.16 (dd, *J* = 14.5, 7.4 Hz, 3H), 1.14 (s, 9H). ESI-MS (acetonitrile/methanol + 1% water), positive: *m/z* 665.08 [M+Na]<sup>+</sup> (calcd *m/z* for [C<sub>26</sub>H<sub>30</sub>BrIN<sub>2</sub>NaO<sub>4</sub>]<sup>+</sup> 665.03).

- *tert*-Butyl 12-bromo-9-(ethoxymethyl)-5,6-dihydroindolo[2,3-*e*][3]benzazocin-8-one (**IV**b in Scheme 1)

Under argon atmosphere, to a solution of **III**b (7.55 g, 12.05 mmol) in dry DMF (175 mL) palladium(II) acetate (898 mg, 4 mmol), triphenylphosphine (2.1 g, 0.8 mmol) and silver(I) carbonate (8.3 g, 30.13 mmol) were added, and the suspension was stirred at 110 °C for 2 h. The solvent was removed *in vacuo*, and the black residue was taken up in DCM (50 mL). The suspension was filtered over celite and rinsed with DCM (50 mL). After evaporation of the solvent, the crude product was purified on silica by using hexane/ethyl acetate 85:15 as eluent to give a white solid. Yield: 4.1 g, 68%. <sup>1</sup>H NMR (500 MHz, DMSO-*d*<sub>6</sub>) δ 7.83 – 7.78 (m, 1H), 7.60 – 7.56 (m, 2H), 7.42 – 7.35 (m, 4H), 5.89 (d, *J* = 10.9 Hz, 1H), 5.80 (d, *J* = 10.9 Hz, 1H), 4.10 (ddd, *J* = 14.6, 8.0, 6.6 Hz, 1H), 3.62 – 3.54 (m, 1H), 3.50 – 3.42 (m, 1H), 3.33 (1H, H<sub>2</sub>O overlapped), 2.97

(ddd,  $J = 14.0, 8.1, 5.7$  Hz, 1H), 2.79 (ddd,  $J = 14.4, 8.2, 6.6$  Hz, 1H), 1.20 (s, 9H), 1.05 (t,  $J = 7.0$  Hz, 3H). ESI-MS (acetonitrile/methanol + 1% water), positive:  $m/z$  523.13  $[M+Na]^+$  (calcd  $m/z$  for  $[C_{25}H_{27}BrN_2NaO_4]^+$  523.10).

○ *tert-Butyl 13-bromo-10-(ethoxymethyl)-5,6-dihydroindolo[2,3-*e*][4]benzazonin-9-one (IVd in Scheme 1)*

Under argon atmosphere, to a solution of **III**d (5.22 g, 8.1 mmol) in dry DMF (280 mL) palladium(II) acetate (270 mg, 1.2 mmol), triphenylphosphine (640 mg, 2.44 mmol) and silver(I) carbonate (4.5 g, 16.28 mmol) were added, and the suspension was stirred at 140 °C for 2.5 h. The solvent was removed *in vacuo*, and the black residue was taken up in DCM (100 mL). The suspension was filtered over celite and rinsed with DCM (50 mL). After evaporation of the solvent, the crude product was purified on silica by using hexane/ethyl acetate 88:12 as eluent to give a white solid. Yield: 4.1 g, 68%.  $^1H$  NMR (500 MHz, DMSO- $d_6$ )  $\delta$  7.83 – 7.78 (m, 1H), 7.60 – 7.56 (m, 2H), 7.42 – 7.35 (m, 4H), 5.89 (d,  $J = 10.9$  Hz, 1H), 5.80 (d,  $J = 10.9$  Hz, 1H), 4.10 (ddd,  $J = 14.6, 8.0, 6.6$  Hz, 1H), 3.62 – 3.54 (m, 1H), 3.50 – 3.42 (m, 1H), 3.33, (1H, H<sub>2</sub>O overlapped), 2.97 (ddd,  $J = 14.0, 8.1, 5.7$  Hz, 1H), 2.79 (ddd,  $J = 14.4, 8.2, 6.6$  Hz, 1H), 1.20 (s, 9H), 1.05 (t,  $J = 7.0$  Hz, 3H), two proton signals are likely overlapping with DMSO. ESI-MS (acetonitrile/methanol + 1% water), positive:  $m/z$  537.17  $[M+Na]^+$  (calcd  $m/z$  for  $[C_{26}H_{29}BrN_2NaO_4]^+$  537.12).

○ *12-Bromo-5,6,7,9-tetrahydroindolo[2,3-*e*][3]benzazocin-8(7H)-one (Vb in Scheme 1)*

To a solution of **IV**b (4.08 g, 8.1 mmol) in dioxane (160 mL) 1 M HCl (80 mL) was added, and the reaction mixture was stirred at 80 °C for 2 h. After cooling to room temperature, the solution was neutralized with solid NaHCO<sub>3</sub>. The product was extracted with DCM (3 × 100 mL). The organic phase was afterwards dried over magnesium sulfate. The solution was evaporated *in vacuo*, and the residue was taken up in methanol (7 mL) and left stirring at 40 °C and 320 mbar for 20 min. The white precipitate was isolated by filtration and washed with diethylether. Yield: 2.13 g, 78%.  $^1H$  NMR (500 MHz, DMSO- $d_6$ )  $\delta$  12.01 (s, 1H), 7.74 (t,  $J = 3.7$  Hz, 1H), 7.58 (d,  $J = 1.8$  Hz, 1H), 7.44 – 7.39 (m, 3H), 7.39 – 7.32 (m, 3H), 3.63 (s, 1H), 3.33 (1H, water overlapped) 2.95 (d,  $J = 9.3$  Hz, 2H). ESI-MS (acetonitrile/methanol + 1% water), positive:  $m/z$  341.14  $[M+H]^+$  (calcd  $m/z$  for  $[C_{17}H_{14}BrN_2O]^+$  341.03).



- *13-Bromo-5,6,7,10-tetrahydroindolo[2,3-f][4]benzazonin-9(8H)-one (Vd in Scheme 1)*

To a solution of **IVd** (1.98 g, 4.57 mmol) in ethanol (140 mL) 12 M HCl (35 mL) was added. The solution was stirred at 100 °C for 1 h, then cooled to room temperature and neutralized with a saturated aqueous solution of NaHCO<sub>3</sub>. Ethanol was removed at reduced pressure, and the aqueous suspension extracted with ethyl acetate (3 × 150 mL). The combined organic phases were washed with brine (200 mL) and dried over magnesium sulfate. After evaporation of the solvent, the crude solid was suspended in acetone (5 mL) and filtered. The filtrate was stored at 4 °C overnight generating crystals of X-ray diffraction quality.

- *5,6,7,9-tetrahydroindolo[2,3-e]benzazocin-8-thione (VIa in Scheme 2)*

Under argon atmosphere, to a solution of **Va** (500 mg, 1.91 mmol) in dry dioxane (50 mL) Lawesson's reagent (280 mg, 0.69 mmol) was added. The mixture was stirred at 110 °C for 4 h. The cooled solution was concentrated and the crude product purified on silica using hexane/ethyl acetate 4:1 as eluent to give a yellow solid. Yield: 375 mg, 71%. <sup>1</sup>H NMR (500 MHz, DMSO-*d*<sub>6</sub>) δ 11.64 (s, 1H), 10.38 (t, *J* = 5.3 Hz, 1H), 7.47 (t, *J* = 8.2 Hz, 2H), 7.36 (d, *J* = 6.3 Hz, 1H), 7.33 – 7.28 (m, 3H), 7.23 (t, *J* = 7.6 Hz, 1H), 7.07 (t, *J* = 7.5 Hz, 1H), 3.88 (d, *J* = 5.8 Hz, 1H), 3.49 (dd, *J* = 13.1, 6.2 Hz, 1H), 3.19 – 3.10 (m, 1H), 3.01 (dd, *J* = 15.9, 7.8 Hz, 1H). ESI-MS (acetonitrile/methanol + 1% water), negative: *m/z* 277.02 [M–H]<sup>–</sup> (calcd *m/z* for [C<sub>17</sub>H<sub>13</sub>N<sub>2</sub>S]<sup>–</sup> 277.08).

- *12-Bromo-5,6,7,9-tetrahydroindolo[2,3-e]benzazocin-8-thione (VIb in Scheme 2)*

Under argon atmosphere, to a solution of **Vb** (1.57 g, 4.6 mmol) in dry dioxane (160 mL) Lawesson's reagent (744 mg, 1.84 mmol) was added, and the resulting solution was stirred at 110 °C for 4 h. The cooled mixture was concentrated and subjected to column chromatography with hexane/ethyl acetate 4:1 as eluent to give a yellow solid. Yield: 693 mg, 42%. <sup>1</sup>H NMR (500 MHz, DMSO-*d*<sub>6</sub>) δ 11.96 (s, 1H), 10.55 (s, 1H), 7.61 (s, 1H), 7.52 (d, *J* = 8.7 Hz, 1H), 7.45 – 7.36 (m, 5H), 3.93 (d, *J* = 5.5 Hz, 1H), 3.56 (dd, *J* = 13.5, 6.5 Hz, 1H), 3.24 – 3.17 (m, 1H), 3.11 – 3.03 (m, 1H). ESI-MS (acetonitrile/methanol + 1% water), negative: *m/z* 356.87 [M–H]<sup>–</sup> (calcd *m/z* for [C<sub>17</sub>H<sub>12</sub>N<sub>2</sub>SBr]<sup>–</sup> 356.99).

○ 5,6,7,10-tetrahydroindolo[2,3-*f*]benzazonin-9-thione (**VIc** in Scheme 2)

Under argon atmosphere, to a solution of **Vc** (189 mg, 0.68 mmol) in dry dioxane (15 mL) Lawesson's reagent (83 mg, 0.21 mmol) was added. The mixture was stirred at 110 °C for 4 h. The cooled solution was concentrated and the crude product purified on silica using hexane/ethyl acetate 3 : 2 as eluent to give a yellowish solid. Yield: 153 mg, 77%. <sup>1</sup>H NMR (500 MHz, DMSO-*d*<sub>6</sub>) δ 11.66 (s, 1H), 10.27 – 10.19 (m, 1H), 7.42 (d, *J* = 8.2 Hz, 1H), 7.34 – 7.29 (m, 2H), 7.18 (td, *J* = 7.2, 1.8 Hz, 2H), 7.11 (d, *J* = 7.9 Hz, 1H), 7.00 (dd, *J* = 12.6, 7.2 Hz, 2H), 3.45 (d, *J* = 13.1 Hz, 1H), 3.13 (dd, *J* = 21.8, 12.8 Hz, 1H), 2.78 (dd, *J* = 13.1, 7.0 Hz, 1H), 2.21 (t, *J* = 12.5 Hz, 1H), 1.95 – 1.87 (m, 1H), 1.63 (dd, *J* = 25.6, 12.6 Hz, 1H).

○ 13-Bromo-5,6,7,10-tetrahydroindolo[2,3-*f*]benzazonin-9-thione (**VIId** in Scheme 2)

Under argon atmosphere, to a solution of **Vd** (945 mg, 2.66 mmol) in dry dioxane (75 mL) Lawesson's reagent (355 mg, 0.88 mmol) was added. The mixture was stirred at 110 °C for 4 h. The cooled solution was concentrated, and the crude product purified on silica using hexane/ethyl acetate 4:1 as eluent to give a yellowish solid. Yield: 379 mg, 22% calculated from **IVd**. <sup>1</sup>H NMR (500 MHz, DMSO-*d*<sub>6</sub>) δ 11.93 (s, 1H), 10.34 – 10.27 (m, 1H), 7.40 (d, *J* = 8.6 Hz, 1H), 7.33 (d, *J* = 4.1 Hz, 2H), 7.30 (dd, *J* = 8.6, 1.8 Hz, 1H), 7.23 – 7.17 (m, 2H), 7.00 (d, *J* = 7.5 Hz, 1H), 3.50 – 3.40 (m, 1H), 3.11 (dd, *J* = 22.6, 11.6 Hz, 1H), 2.78 (dd, *J* = 13.0, 6.8 Hz, 1H), 2.19 (t, *J* = 12.7 Hz, 1H), 1.96 – 1.87 (m, 1H), 1.62 (dd, *J* = 25.9, 12.3 Hz, 1H). ESI-MS (acetonitrile/methanol + 1% water), negative: *m/z* 370.85 [M-H]<sup>-</sup> (calcd *m/z* for [C<sub>18</sub>H<sub>14</sub>N<sub>2</sub>S]<sup>-</sup> 371.00).

○ 8-Hydrazin-yl-5,6,7,9-tetrahydroindolo[2,3-*e*]benzazocine (**VIIa** in Scheme 2)

To a solution of **VIa** (100 mg, 0.36 mmol) in chloroform (17 mL) hydrazine monohydrate (2.2 mL) was added, and the resulting solution was refluxed for 3 h. The cooled solution was washed thoroughly with water (2 × 15 mL), and the organic phase was dried over magnesium sulfate. The resulting yellow oil was precipitated with hexane, and the solvent was removed *in vacuo*. The product was obtained as a light-yellow solid. Yield: 81.4 mg, 82%. <sup>1</sup>H NMR (500 MHz, DMSO-*d*<sub>6</sub>) δ 11.16 (s, 1H), 7.56 – 7.52 (m, 1H), 7.44 (d, *J* = 8.0 Hz, 1H), 7.40 (d, *J* = 8.1 Hz, 1H), 7.38 – 7.34 (m, 2H), 7.31 – 7.27 (m, 1H), 7.13 – 7.08 (m, 1H), 6.99 – 6.94 (m, 1H), 6.02 (s, 2H), 4.04 (t, *J* = 5.0 Hz, 1H), 2.95 (s, 1H), 2.70 (s, 2H), one proton signal is likely overlapping with those of solvent molecules. ESI-MS (acetonitrile/methanol + 1% water), positive: *m/z* 277.14 [M+H]<sup>+</sup> (calcd *m/z* for [C<sub>17</sub>H<sub>17</sub>N<sub>4</sub>]<sup>+</sup> 277.14).

- *12-Bromo-8-hydrazin-yl-5,6,7,9-tetrahydroindolo[2,3-e]benzazocine (VI**b** in Scheme 2)*

To a solution of **VIb** (201 mg, 0.56 mmol) in chloroform (40 mL) hydrazine monohydrate (3.5 mL) was added, and the resulting solution was refluxed for 2 h. The cooled solution was washed thoroughly with water (2 × 20 mL), and the organic phase was dried over magnesium sulfate. The resulting yellow oil was precipitated with hexane, and the solvent was removed *in vacuo*. The product was obtained as a light-yellow solid. Yield: 199 mg, 99%. <sup>1</sup>H NMR (500 MHz, DMSO-*d*<sub>6</sub>) δ 11.39 (s, 1H), 8.32 (s, 1H), 7.50 (dd, *J* = 4.9, 1.5 Hz, 2H), 7.40 – 7.34 (m, 3H), 7.33 – 7.28 (m, 1H), 7.22 (dd, *J* = 8.6, 1.9 Hz, 1H), 6.13 (s, 2H), 3.37 (1H, water overlapped), 2.95 (d, *J* = 10.2 Hz, 1H), 2.74 – 2.64 (m, 2H). ESI-MS (acetonitrile/methanol + 1% water), positive: *m/z* 357.07 [M+H]<sup>+</sup> (calcd *m/z* for [C<sub>17</sub>H<sub>16</sub>N<sub>4</sub>Br]<sup>+</sup> 357.06).

- *9-Hydrazin-yl-5,6,7,10-tetrahydroindolo[2,3-f]benzazonine (VI**c** in Scheme 2)*

To a solution of **VIc** (144 mg, 0.49 mmol) in chloroform (25 mL) hydrazine monohydrate (3 mL) was added. The mixture was stirred at 85 °C for 3 h. The cooled solution was washed with water (2 × 25 mL) and dried over magnesium sulfate. The organic phase was concentrated, and the crude oil was taken up in DCM (10 mL), then hexane (5 mL) was added. The solvents were removed to give a yellowish solid. Yield: 138 mg, 97%. <sup>1</sup>H NMR (500 MHz, DMSO-*d*<sub>6</sub>) δ 11.34 (s, 1H), 7.38 (d, *J* = 8.0 Hz, 1H), 7.33 (d, *J* = 6.8 Hz, 1H), 7.29 (t, *J* = 8.0 Hz, 1H), 7.23 – 7.09 (m, 4H), 6.96 (t, *J* = 7.0 Hz, 1H), 5.17 (s, 1H), 4.76 (s, 1H), 3.03 (s, 2H), 1.73 (s, 2H), three proton signals are likely overlapping with solvent resonances. ESI-MS (acetonitrile/methanol+1% water), positive: *m/z* 291.18 [M+H]<sup>+</sup> (calcd *m/z* for [C<sub>18</sub>H<sub>19</sub>N<sub>4</sub>]<sup>+</sup> 291.16).

- *13-Bromo-9-hydrazin-yl-5,6,7,10-tetrahydroindolo[2,3-f]benzazonine (VI**d** in Scheme 2)*

To a solution of **VI d** (379 mg, 1.02 mmol) in chloroform (64 mL) hydrazine monohydrate (5.6 mL) was added. The mixture was stirred at 85 °C for 3 h. The cooled solution was washed with water (2 × 100 mL) and dried over magnesium sulfate. The organic phase was concentrated and the crude oil was taken up in DCM (30 mL), then hexane (10 mL) was added. The solvents were removed to give a yellowish solid. Yield: 352 mg, 95%. ESI-MS (acetonitrile/methanol + 1% water), positive: *m/z* 369.12 [M+H]<sup>+</sup> (calcd *m/z* for [C<sub>18</sub>H<sub>18</sub>BrN<sub>4</sub>]<sup>+</sup> 369.07).

- Structural Conformation Details

**Table S1.** Torsional angles in eight-membered azocine ring(s) in **VIa**·**HL**<sup>4</sup>, **2** and **4**.

| Compound                            | <b>VIa</b> | <b>HL</b> <sup>4</sup> | <b>2</b>   | <b>4</b>   |
|-------------------------------------|------------|------------------------|------------|------------|
| $\Theta_{\text{N7-C6-C5-C4a}}$      | 64.6(1)    | 50.2(4)                | 66.3(2)    | -48.61(18) |
| $\Theta_{\text{C6-C5-C4a-C13c}}$    | -88.97(9)  | -88.3(4)               | -93.76(18) | 93.15(17)  |
| $\Theta_{\text{C5-C4a-C13c-C13b}}$  | -3.55(9)   | -1.5(4)                | 1.1(2)     | -4.0(2)    |
| $\Theta_{\text{C4a-C13c-C13b-C8a}}$ | 51.76(10)  | 53.8(4)                | 46.1(2)    | -51.1(2)   |
| $\Theta_{\text{C13c-C13b-C8a-C8}}$  | 15.12(12)  | 3.9(5)                 | 14.5(3)    | -12.7(2)   |
| $\Theta_{\text{C13b-C8a-C8-N7}}$    | -47.89(13) | -19.3(5)               | -50.1(3)   | 58.1(2)    |
| $\Theta_{\text{C8a-C8-N7-C6}}$      | -19.79(14) | -61.6(4)               | -12.4(3)   | 15.1(3)    |
| $\Theta_{\text{C8-N7-C6-C5}}$       | 24.98(14)  | 60.7(4)                | 17.7(3)    | -37.3(2)   |

- Molecular Docking Calculations

**Table S2.** The binding affinities as predicted by the scoring functions for the tubulin-colchicine complex.<sup>2</sup> CN2 is the co-crystallised ligand. Root-mean-square deviation – RMSD from the co-crystallised ligand (heavy atoms) in Å.

| Complexes | GS   | Ligands               | GS     | CS     | ChemPLP | ASP    |
|-----------|------|-----------------------|--------|--------|---------|--------|
| <b>1</b>  | 61.9 | <b>HL<sup>1</sup></b> | 57.0   | 30.2   | 60.4    | 33.6   |
| <b>2</b>  | 53.2 | <b>HL<sup>2</sup></b> | 62.2   | 30.7   | 65.9    | 27.0   |
| <b>3</b>  | 57.9 | <b>HL<sup>3</sup></b> | 56.7   | 30.0   | 58.5    | 29.7   |
| <b>4</b>  | 51.3 | <b>HL<sup>4</sup></b> | 61.3   | 30.4   | 58.1    | 25.0   |
| <b>5</b>  | 53.7 | <b>HL<sup>5</sup></b> | 61.3   | 34.0   | 62.1    | 31.8   |
| <b>6</b>  | 50.0 | <b>HL<sup>6</sup></b> | 59.2   | 35.1   | 62.2    | 26.5   |
|           |      | CN2                   | 61.9   | 21.6   | 60.1    | 17.4   |
|           |      | RMSD:                 | 7.5155 | 2.8032 | 1.0908  | 7.1644 |

**Table S3.** The molecular descriptors as calculated by QikProp and their corresponding Known Drug Indexes 2a and 2b (KDI<sub>2a/2b</sub>).

|                       | RB | MW(g/mol) | HD | HA  | Log P | PSA (Å <sup>2</sup> ) | KDI <sub>2A</sub> | KDI <sub>2B</sub> |
|-----------------------|----|-----------|----|-----|-------|-----------------------|-------------------|-------------------|
| <b>HL<sup>1</sup></b> | 3  | 365.4     | 2  | 4   | 4.7   | 63.5                  | 5.41              | 0.52              |
| <b>HL<sup>2</sup></b> | 3  | 379.5     | 2  | 3.5 | 5.3   | 59.9                  | 5.14              | 0.34              |
| <b>HL<sup>3</sup></b> | 3  | 444.3     | 2  | 4   | 5.2   | 63.5                  | 5.07              | 0.33              |
| <b>HL<sup>4</sup></b> | 3  | 458.4     | 2  | 3.5 | 5.8   | 59.9                  | 4.73              | 0.19              |
| <b>HL<sup>5</sup></b> | 3  | 393.5     | 2  | 3.5 | 5.5   | 60.9                  | 5.05              | 0.30              |
| <b>HL<sup>6</sup></b> | 3  | 472.4     | 2  | 3.5 | 6.1   | 60.9                  | 4.60              | 0.14              |

**Table S4.** The molecular descriptors as calculated by Scigress.

|                       | MW(g/mol) | HD | HA | Log <i>P</i> |
|-----------------------|-----------|----|----|--------------|
| <b>HL<sup>1</sup></b> | 365.4     | 2  | 5  | 4.4          |
| <b>HL<sup>2</sup></b> | 379.5     | 2  | 5  | 4.1          |
| <b>HL<sup>3</sup></b> | 444.3     | 2  | 5  | 5.2          |
| <b>HL<sup>4</sup></b> | 458.4     | 2  | 5  | 4.9          |
| <b>HL<sup>5</sup></b> | 393.5     | 2  | 5  | 4.5          |
| <b>HL<sup>6</sup></b> | 472.4     | 2  | 5  | 5.2          |
| <b>1</b>              | 499.9     | 2  | 5  | 5.4          |
| <b>2</b>              | 513.9     | 2  | 5  | 4.7          |
| <b>3</b>              | 578.8     | 2  | 5  | 6.2          |
| <b>4</b>              | 592.8     | 2  | 5  | 5.5          |
| <b>5</b>              | 527.9     | 2  | 5  | 5.1          |
| <b>6</b>              | 606.8     | 2  | 5  | 5.9          |

**Table S5.** Definition of lead-like, drug-like and Known Drug Space (KDS) in terms of molecular descriptors. The values given are the maxima for each descriptor for the volumes of chemical space used.

|                                            | Lead-like<br>Space | Drug-like Space | Known Drug<br>Space |
|--------------------------------------------|--------------------|-----------------|---------------------|
| Molecular weight (g mol <sup>-1</sup> )    | 300                | 500             | 800                 |
| Lipophilicity (Log <i>P</i> )              | 3                  | 5               | 6.5                 |
| Hydrogen bond donors (HD)                  | 3                  | 5               | 7                   |
| Hydrogen bond acceptors (HA)               | 3                  | 10              | 15                  |
| Polar surface area (Å <sup>2</sup> ) (PSA) | 60                 | 140             | 180                 |
| Rotatable bonds (RB)                       | 3                  | 10              | 17                  |



- Yields, Elemental Analysis and ESI MS data

**Table S6.** Yields, elemental analysis and ESI mass spectrometric data for ligands **HL<sup>1</sup>–HL<sup>4</sup>**.

|                      |                       | <b>HL<sup>1</sup></b>                                                                                  | <b>HL<sup>2</sup></b>                                                              | <b>HL<sup>3</sup></b>                                                                | <b>HL<sup>4</sup></b>                                                                |
|----------------------|-----------------------|--------------------------------------------------------------------------------------------------------|------------------------------------------------------------------------------------|--------------------------------------------------------------------------------------|--------------------------------------------------------------------------------------|
| Yield (%)            |                       | 84                                                                                                     | 81                                                                                 | 71                                                                                   | 58                                                                                   |
| empirical formula    |                       | C <sub>23</sub> H <sub>19</sub> N <sub>5</sub> ·0.2H <sub>2</sub> O·0.2C <sub>2</sub> H <sub>6</sub> O | C <sub>24</sub> H <sub>21</sub> N <sub>5</sub> ·0.3C <sub>2</sub> H <sub>6</sub> O | C <sub>23</sub> H <sub>18</sub> N <sub>5</sub> Br·0.2C <sub>2</sub> H <sub>6</sub> O | C <sub>24</sub> H <sub>20</sub> N <sub>5</sub> Br·0.4C <sub>2</sub> H <sub>6</sub> O |
| <i>M<sub>r</sub></i> |                       | 378.24                                                                                                 | 393.28                                                                             | 453.54                                                                               | 476.368                                                                              |
| C (%)                | calcd                 | 74.30                                                                                                  | 75.12                                                                              | 61.96                                                                                | 62.47                                                                                |
|                      | found                 | 74.06                                                                                                  | 75.32                                                                              | 61.98                                                                                | 62.13                                                                                |
| H (%)                | calcd                 | 5.48                                                                                                   | 5.84                                                                               | 4.26                                                                                 | 4.73                                                                                 |
|                      | found                 | 5.12                                                                                                   | 5.53                                                                               | 4.00                                                                                 | 4.33                                                                                 |
| N (%)                | calcd                 | 18.51                                                                                                  | 17.80                                                                              | 15.44                                                                                | 14.68                                                                                |
|                      | found                 | 18.15                                                                                                  | 17.55                                                                              | 15.18                                                                                | 14.61                                                                                |
| O (%)                | calcd                 |                                                                                                        |                                                                                    |                                                                                      |                                                                                      |
|                      | found                 |                                                                                                        |                                                                                    |                                                                                      |                                                                                      |
| ESI-MS               | [M + Na] <sup>+</sup> |                                                                                                        |                                                                                    |                                                                                      |                                                                                      |
|                      | [M + H] <sup>+</sup>  | 366.17                                                                                                 | 380.19                                                                             | 444.08                                                                               | 458.09                                                                               |
| X-ray                |                       | no                                                                                                     | no                                                                                 | no                                                                                   | yes                                                                                  |

**Table S7.** Yields, elemental analysis and ESI MS data for ligands **HL**<sup>5</sup> and **HL**<sup>6</sup>, and complexes **1** and **2**.

|                      |                         | <b>HL</b> <sup>5</sup>                                                              | <b>HL</b> <sup>6</sup>                                                            | <b>1</b>                                                         | <b>2</b>                                                                                                                 |
|----------------------|-------------------------|-------------------------------------------------------------------------------------|-----------------------------------------------------------------------------------|------------------------------------------------------------------|--------------------------------------------------------------------------------------------------------------------------|
| Yield (%)            |                         | 46                                                                                  | 41                                                                                | 70                                                               | 56                                                                                                                       |
| empirical formula    |                         | C <sub>25</sub> H <sub>23</sub> N <sub>5</sub> ·0.75CH <sub>2</sub> Cl <sub>2</sub> | C <sub>25</sub> H <sub>22</sub> N <sub>5</sub> Br·CH <sub>2</sub> Cl <sub>2</sub> | C <sub>23</sub> H <sub>19</sub> N <sub>5</sub> CuCl <sub>2</sub> | C <sub>24</sub> H <sub>21</sub> N <sub>5</sub> CuCl <sub>2</sub> ·0.8H <sub>2</sub> O·0.2C <sub>3</sub> H <sub>8</sub> O |
| <i>M<sub>r</sub></i> |                         | 454.63                                                                              | 540.24                                                                            | 499.88                                                           | 513.91                                                                                                                   |
| C (%)                | calcd                   | 67.95                                                                               | 56.03                                                                             | 55.26                                                            | 54.68                                                                                                                    |
|                      | found                   | 67.89                                                                               | 55.915                                                                            | 55.39                                                            | 54.87                                                                                                                    |
| H (%)                | calcd                   | 5.41                                                                                | 4.34                                                                              | 3.83                                                             | 4.51                                                                                                                     |
|                      | found                   | 5.445                                                                               | 4.3                                                                               | 3.44                                                             | 4.16                                                                                                                     |
| N (%)                | calcd                   | 15.4                                                                                | 12.56                                                                             | 14.01                                                            | 12.96                                                                                                                    |
|                      | found                   | 15.055                                                                              | 12.455                                                                            | 13.71                                                            | 12.57                                                                                                                    |
| O (%)                | calcd                   |                                                                                     |                                                                                   |                                                                  |                                                                                                                          |
|                      | found                   |                                                                                     |                                                                                   |                                                                  |                                                                                                                          |
| ESI-MS               | [M+H] <sup>+</sup>      | 394.22                                                                              | 474.17                                                                            |                                                                  |                                                                                                                          |
|                      | [M-HCl-Cl] <sup>+</sup> |                                                                                     |                                                                                   | 427.08                                                           | 441.1                                                                                                                    |
| X-ray                |                         | no                                                                                  | yes                                                                               | no                                                               | yes                                                                                                                      |

**Table S8.** Yields, elemental analysis and ESI MS data for complexes **3–6**.

|                   |                | <b>3</b>                                                 | <b>4</b>                                   | <b>5</b>                               | <b>6</b>                                               |
|-------------------|----------------|----------------------------------------------------------|--------------------------------------------|----------------------------------------|--------------------------------------------------------|
| Yield (%)         |                | 92                                                       | 81                                         | 58                                     | 73                                                     |
| empirical formula |                | $C_{23}H_{18}N_5BrCuCl_2 \cdot 0.2C_3H_8O \cdot 0.3H_2O$ | $C_{24}H_{20}N_5BrCuCl_2 \cdot 0.9C_3H_8O$ | $C_{25}H_{23}N_5CuCl_2 \cdot 1.75H_2O$ | $C_{25}H_{22}N_5BrCuCl_2 \cdot C_3H_8O \cdot 0.75H_2O$ |
| $M_r$             |                | 596.2                                                    | 646.89                                     | 557.58                                 | 677.54                                                 |
| C (%)             | calcd          | 47.54                                                    | 49.57                                      | 53.67                                  | 49.42                                                  |
|                   | found          | 47.65                                                    | 49.21                                      | 53.61                                  | 49.48                                                  |
| H (%)             | calcd          | 3.41                                                     | 4.23                                       | 4.77                                   | 4.66                                                   |
|                   | found          | 3.085                                                    | 3.95                                       | 4.625                                  | 4.585                                                  |
| N (%)             | calcd          | 11.74                                                    | 10.82                                      | 12.51                                  | 10.29                                                  |
|                   | found          | 11.435                                                   | 10.465                                     | 12.46                                  | 10.03                                                  |
| O (%)             | calcd          |                                                          |                                            |                                        |                                                        |
|                   | found          |                                                          |                                            |                                        |                                                        |
| ESI-MS            | $[M-Cl]^+$     |                                                          |                                            | 491.16                                 | 571.01                                                 |
|                   | $[M-HCl-Cl]^+$ | 506.99                                                   | 521.01                                     |                                        |                                                        |
| X-ray             |                | no                                                       | yes                                        | yes                                    | no                                                     |

• Additional X-ray Diffraction Data

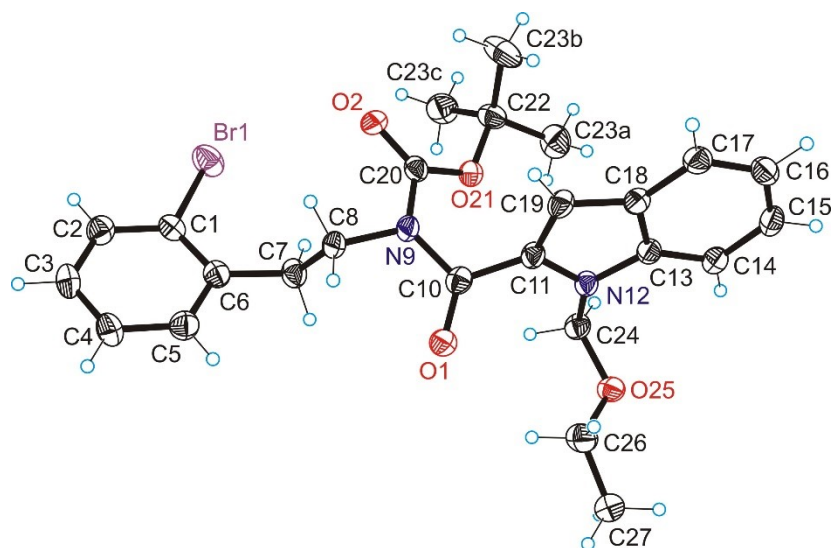

Figure S1. ORTEP view of IIIa.

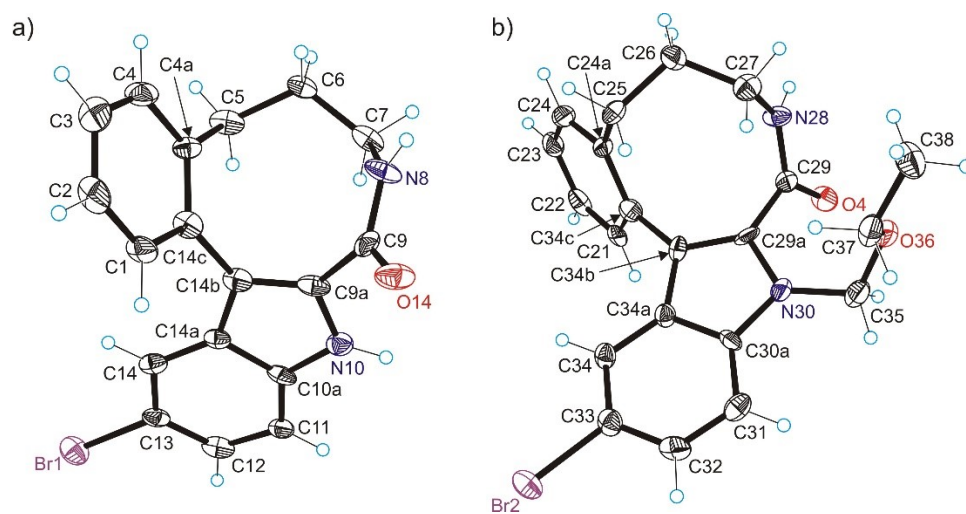

Figure S2. ORTEP view of a) Vd and b) Vd<sup>EOM</sup>



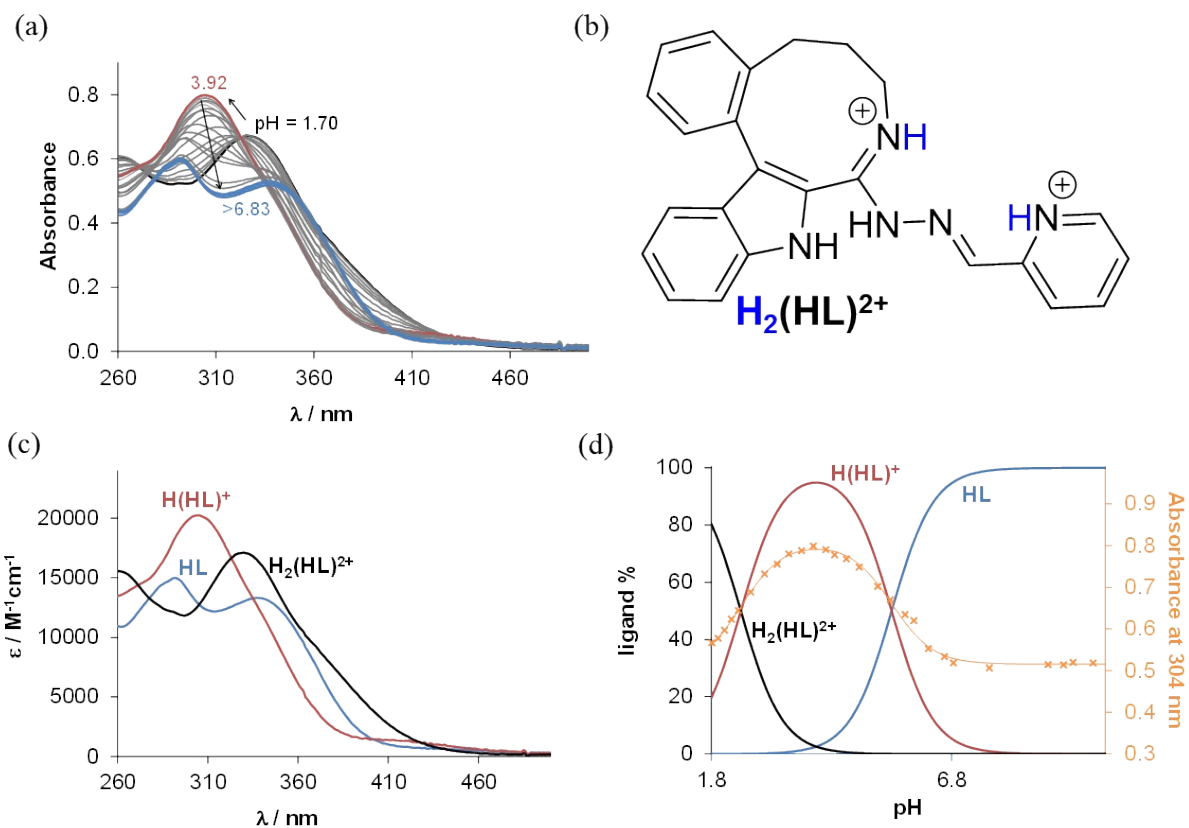

**Figure S4.** (a) UV-vis spectra of  $\text{HL}^5$  measured at various pH values; (b) The ligand in its doubly protonated form; (c) Molar absorptance spectra computed for selected ligand species in the various protonation states; (d) Concentration distribution curves and the absorbance values measured at  $304 \text{ nm}$  ( $\times$ ) together with the fitted line  $\{C_{\text{HL}^5} = 10 \mu\text{M}, T = 298 \text{ K}, l = 4 \text{ cm}, I = 0.10 \text{ M (KCl)}, 30\% \text{ (v/v) DMSO/H}_2\text{O}\}$ .

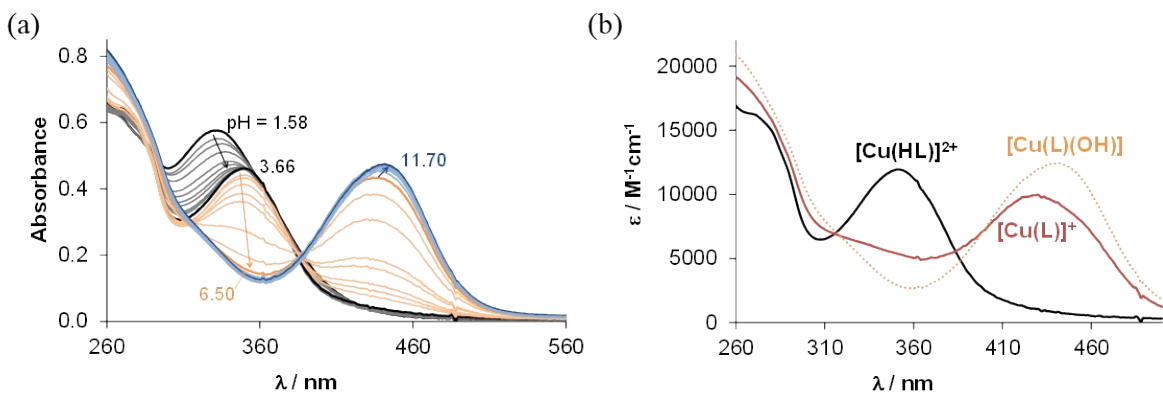

**Figure S5.** (a) UV-vis spectra measured for the Cu(II) – HL<sup>5</sup> system at various pH values; (b) Molar absorptance spectra computed for selected complex species in the various protonation states { $c_{\text{HL}5} = 10 \mu\text{M}$ ,  $c_{\text{Cu(II)}} = 10 \mu\text{M}$ ,  $T = 298 \text{ K}$ ,  $l = 4 \text{ cm}$ ,  $I = 0.10 \text{ M}$  (KCl), 30% (v/v) DMSO/H<sub>2</sub>O}.

- Crystallographic Data Collection

**Table S9.** Crystal data and details of data collection and refinement for **IIIa**, **Vd-VdMeOH**, **VIa·0.5MeOH**, **HL<sup>4</sup>** and **HL<sup>6</sup>·DCM**.

| Compound                                   | <b>IIIa</b>                                                     | <b>Vd-Vd<sup>EOM</sup></b>                                                    | <b>VIa·0.5MeOH</b>                                                  | <b>HL<sup>4</sup></b>                            | <b>HL<sup>6</sup>·DCM</b>                                        |
|--------------------------------------------|-----------------------------------------------------------------|-------------------------------------------------------------------------------|---------------------------------------------------------------------|--------------------------------------------------|------------------------------------------------------------------|
| empirical formula                          | C <sub>25</sub> H <sub>29</sub> BrN <sub>2</sub> O <sub>4</sub> | C <sub>39</sub> H <sub>36</sub> Br <sub>2</sub> N <sub>4</sub> O <sub>3</sub> | C <sub>17.5</sub> H <sub>16</sub> N <sub>2</sub> O <sub>0.5</sub> S | C <sub>24</sub> H <sub>20</sub> BrN <sub>5</sub> | C <sub>26</sub> H <sub>24</sub> BrCl <sub>2</sub> N <sub>5</sub> |
| fw                                         | 501.41                                                          | 768.54                                                                        | 294.38                                                              | 458.36                                           | 557.31                                                           |
| space group                                | triclinic, <i>P</i> 1̄                                          | monoclinic, <i>P</i> 2 <sub>1</sub> / <i>c</i>                                | P-1                                                                 | orthorhombic, <i>Pna</i> 2 <sub>1</sub>          | triclinic, <i>P</i> 1̄                                           |
| <i>a</i> , Å                               | 9.0922(4)                                                       | 11.5688(12)                                                                   | 9.1130(2)                                                           | 8.0799(3)                                        | 11.5481(7)                                                       |
| <i>b</i> , Å                               | 10.7884(5)                                                      | 10.8490(10)                                                                   | 10.6532(2)                                                          | 15.5637(5)                                       | 11.5707(7)                                                       |
| <i>c</i> , Å                               | 13.2927(7)                                                      | 27.689(5)                                                                     | 16.7093(5)                                                          | 15.6684(6)                                       | 20.2679(13)                                                      |
| $\alpha$ , °                               | 72.853(4)                                                       | 76.6520(12)                                                                   | 108.2046(11)                                                        |                                                  | 79.717(5)                                                        |
| $\beta$ , °                                | 81.357(4)                                                       |                                                                               | 100.2398(10)                                                        |                                                  | 89.452(5)                                                        |
| $\gamma$ , °                               | 75.773(4)                                                       |                                                                               | 92.5769(7)                                                          |                                                  | 64.211(4)                                                        |
| <i>V</i> [Å <sup>3</sup> ]                 | 1203.45(11)                                                     | 3431.1(7)                                                                     | 1507.65(6)                                                          | 1970.35(12)                                      | 2392.2(3)                                                        |
| <i>Z</i>                                   | 2                                                               | 4                                                                             | 4                                                                   | 4                                                | 4                                                                |
| $\lambda$ [Å]                              | 0.71073                                                         | 0.71073                                                                       | 0.71073                                                             | 0.71073                                          | 1.54178                                                          |
| $\rho_{\text{calcd}}$ , g cm <sup>-3</sup> | 1.384                                                           | 1.488                                                                         | 1.297                                                               | 1.545                                            | 1.547                                                            |
| cryst size, mm <sup>3</sup>                | 0.80 × 0.63 × 0.50                                              | 1.0 × 0.6 × 0.3                                                               | 0.358 × 0.309 × 0.28                                                | 0.370 × 0.028 × 0.019                            | 0.09 × 0.07 × 0.06                                               |
| <i>T</i> [K]                               | 100(2)                                                          | 100(2)                                                                        | 100(2)                                                              | 125(2)                                           | 100(2)                                                           |
| $\mu$ , mm <sup>-1</sup>                   | 1.741                                                           | 2.407                                                                         | 0.212                                                               | 2.109                                            | 1.968                                                            |
| <i>R</i> <sub>1</sub> <sup>a</sup>         | 0.0532                                                          | 0.0570                                                                        | 0.0546                                                              | 0.0480                                           | 0.0579                                                           |
| <i>wR</i> <sub>2</sub> <sup>b</sup>        | 0.1577                                                          | 0.1510                                                                        | 0.0945                                                              | 0.1227                                           | 0.1795                                                           |
| GOF <sup>c</sup>                           | 1.081                                                           | 0.907                                                                         | 1.043                                                               | 1.014                                            | 1.058                                                            |

<sup>a</sup>  $R_1 = \Sigma||F_o| - |F_c||/\Sigma|F_o|$ . <sup>b</sup>  $wR_2 = \{\Sigma[w(F_o^2 - F_c^2)^2]/\Sigma[w(F_o^2)^2]\}^{1/2}$ . <sup>c</sup> GOF =  $\{\Sigma[w(F_o^2 - F_c^2)^2]/(n - p)\}^{1/2}$ , where *n* is the number of reflections and *p* is the total number of parameters refined.



**Table S10.** Crystal data and details of data collection and refinement for **2·2DMF**, **4·2DMF·H<sub>2</sub>O**, **5·2DMF** and **5'·i-PrOH·MeOH**.

| Compound                                   | <b>2·2DMF</b>                                                                   | <b>4·2DMF·H<sub>2</sub>O</b>                                                      | <b>5·2DMF</b>                                                                   | <b>5'·i-PrOH·MeOH</b>                                             |
|--------------------------------------------|---------------------------------------------------------------------------------|-----------------------------------------------------------------------------------|---------------------------------------------------------------------------------|-------------------------------------------------------------------|
| empirical formula                          | C <sub>30</sub> H <sub>35</sub> Cl <sub>2</sub> CuN <sub>7</sub> O <sub>2</sub> | C <sub>30</sub> H <sub>36</sub> BrCl <sub>2</sub> CuN <sub>7</sub> O <sub>3</sub> | C <sub>31</sub> H <sub>37</sub> Cl <sub>2</sub> CuN <sub>7</sub> O <sub>2</sub> | C <sub>29</sub> H <sub>34</sub> ClCuN <sub>5</sub> O <sub>2</sub> |
| fw                                         | 660.09                                                                          | 757.01                                                                            | 674.11                                                                          | 583.60                                                            |
| space group                                | triclinic, <i>P</i> $\bar{1}$                                                   | monoclinic, <i>P</i> 2 <sub>1</sub> / <i>c</i>                                    | monoclinic, <i>C</i> 2/ <i>c</i>                                                | triclinic, <i>P</i> $\bar{1}$                                     |
| <i>a</i> , Å                               | 9.8729(2)                                                                       | 17.514(4)                                                                         | 8.8925(5)                                                                       | 7.6320(8)                                                         |
| <i>b</i> , Å                               | 9.9230(2)                                                                       | 10.420(2)                                                                         | 21.1262(10)                                                                     | 11.6124(12)                                                       |
| <i>c</i> , Å                               | 16.4367(4)                                                                      | 18.168(4)                                                                         | 34.302(2)                                                                       | 16.5842(17)                                                       |
| $\alpha$ , °                               | 77.4544(10)                                                                     |                                                                                   |                                                                                 | 90.668(3)                                                         |
| $\beta$ , °                                | 76.6520(12)                                                                     | 90.55(3)                                                                          | 94.643(5)                                                                       | 93.199(3)                                                         |
| $\gamma$ , °                               | 85.2866(10)                                                                     |                                                                                   |                                                                                 | 105.631(3)                                                        |
| <i>V</i> [Å <sup>3</sup> ]                 | 1528.50(6)                                                                      | 3315.6(11)                                                                        | 6422.9(6)                                                                       | 1412.7(3)                                                         |
| <i>Z</i>                                   | 2                                                                               | 4                                                                                 | 8                                                                               | 2                                                                 |
| $\lambda$ [Å]                              | 0.71073                                                                         | 1.54178                                                                           | 1.54178                                                                         | 0.71073                                                           |
| $\rho_{\text{calcd}}$ , g cm <sup>-3</sup> | 1.434                                                                           | 1.517                                                                             | 1.394                                                                           | 1.372                                                             |
| cryst size, mm <sup>3</sup>                | 0.41 × 0.12 × 0.03                                                              | 0.14 × 0.12 × 0.07                                                                | 0.50 × 0.03 × 0.02                                                              | 1.0 × 0.10 × 0.05                                                 |
| <i>T</i> [K]                               | 140(2)                                                                          | 100(2)                                                                            | 100(2)                                                                          | 200(2)                                                            |
| $\mu$ , mm <sup>-1</sup>                   | 1.741                                                                           | 4.173                                                                             | 2.812                                                                           | 0.903                                                             |
| <i>R</i> <sub>1</sub> <sup>a</sup>         | 0.0402                                                                          | 0.0256                                                                            | 0.0751                                                                          | 0.0379                                                            |
| <i>wR</i> <sub>2</sub> <sup>b</sup>        | 0.0945                                                                          | 0.0671                                                                            | 0.2103                                                                          | 0.0966                                                            |
| GOF <sup>c</sup>                           | 1.021                                                                           | 1.044                                                                             | 1.024                                                                           | 1.039                                                             |

<sup>a</sup>  $R_1 = \Sigma||F_o| - |F_c||/\Sigma|F_o|$ . <sup>b</sup>  $wR_2 = \{\Sigma[w(F_o^2 - F_c^2)^2]/\Sigma[w(F_o^2)^2]\}^{1/2}$ . <sup>c</sup> GOF =  $\{\Sigma[w(F_o^2 - F_c^2)^2]/(n - p)\}^{1/2}$ , where *n* is the number of reflections and *p* is the total number of parameters refined.

- UV-vis data

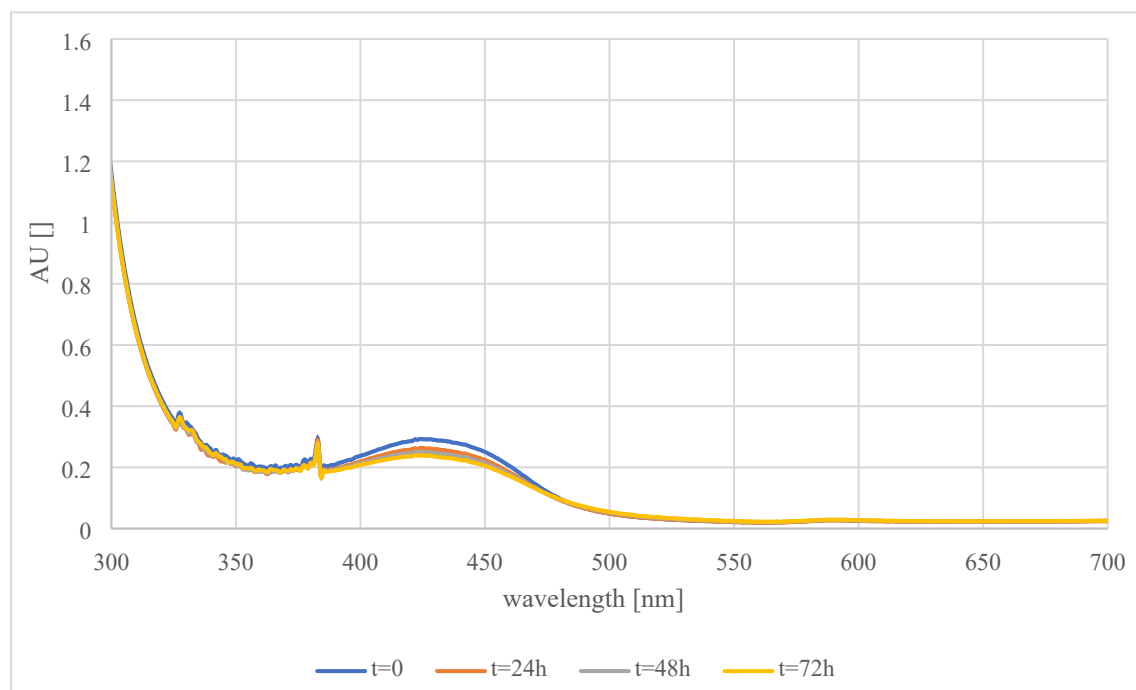

**Figure S6.** UV-vis stability measurement of **1** over 72 h,  $c = 30 \mu\text{M}$  in DMSO/H<sub>2</sub>O 1/99.

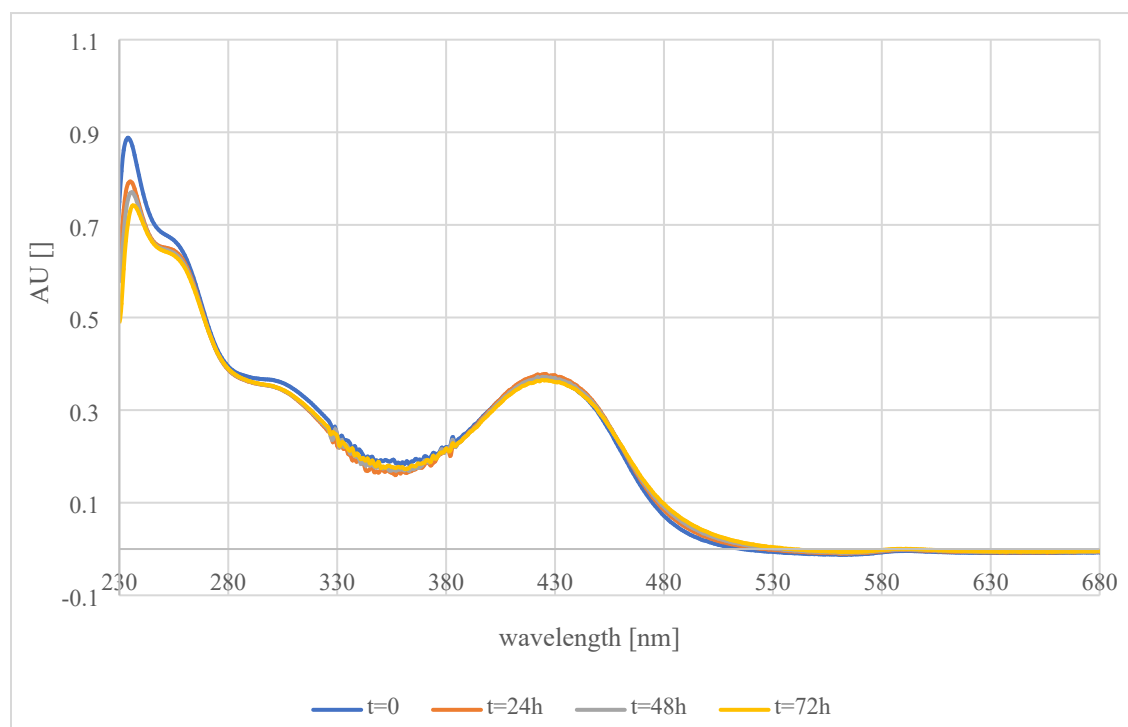

**Figure S7.** UV-vis stability measurement of **2** over 72 h,  $c = 30 \mu\text{M}$  in DMSO/H<sub>2</sub>O 1/99.

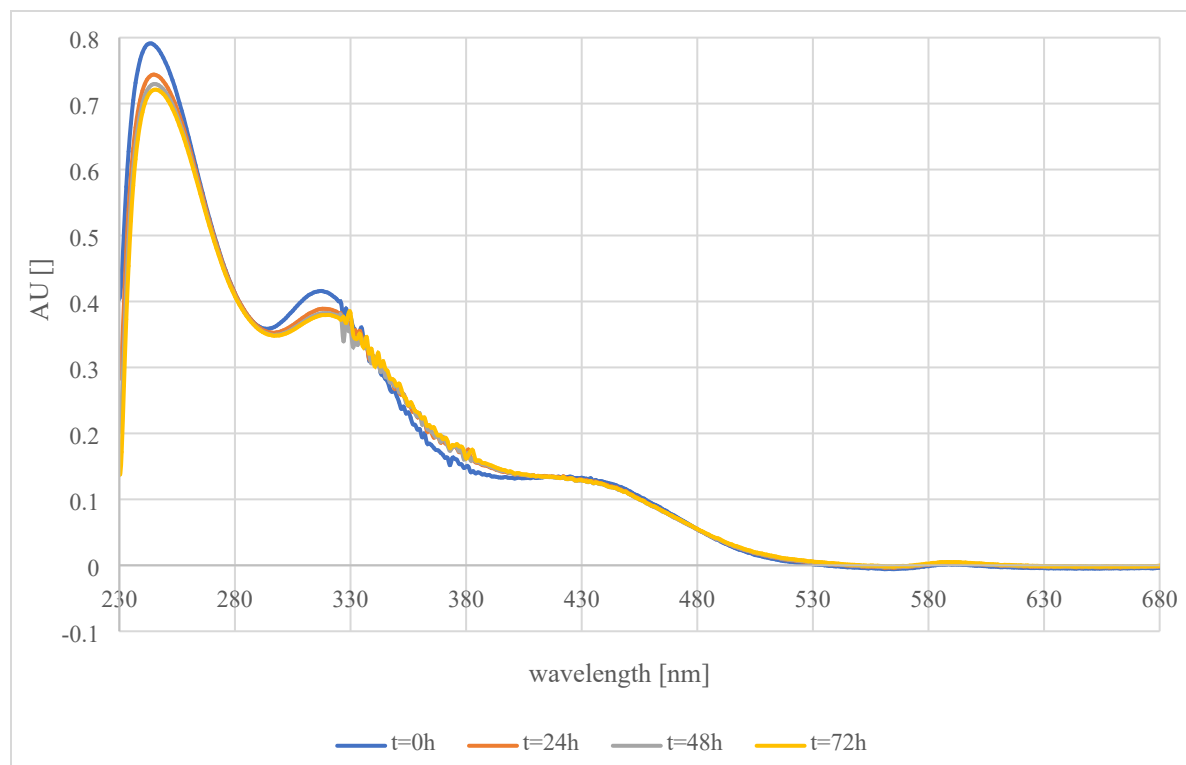

**Figure S8.** UV-vis stability measurement of **3** over 72 h,  $c = 30 \mu\text{M}$  in DMSO/H<sub>2</sub>O 1/99.

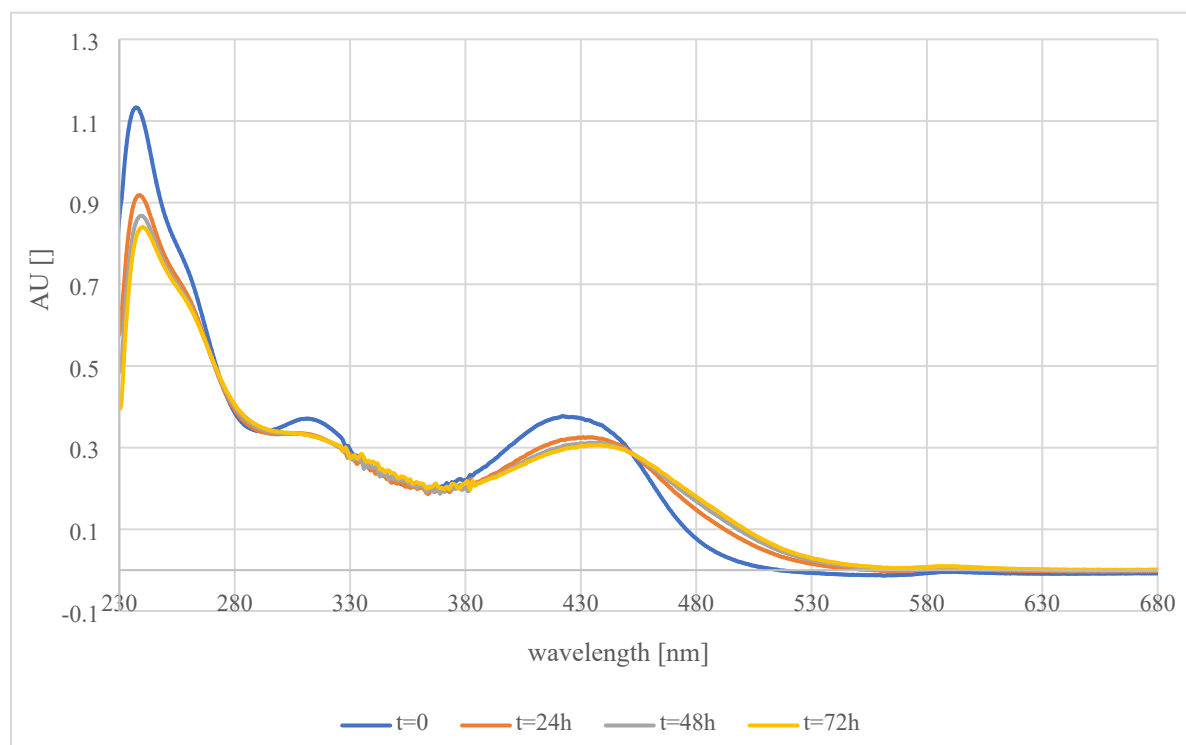

**Figure S9.** UV-vis stability measurement of **4** over 72 h,  $c = 30 \mu\text{M}$  in DMSO/H<sub>2</sub>O 1/99.

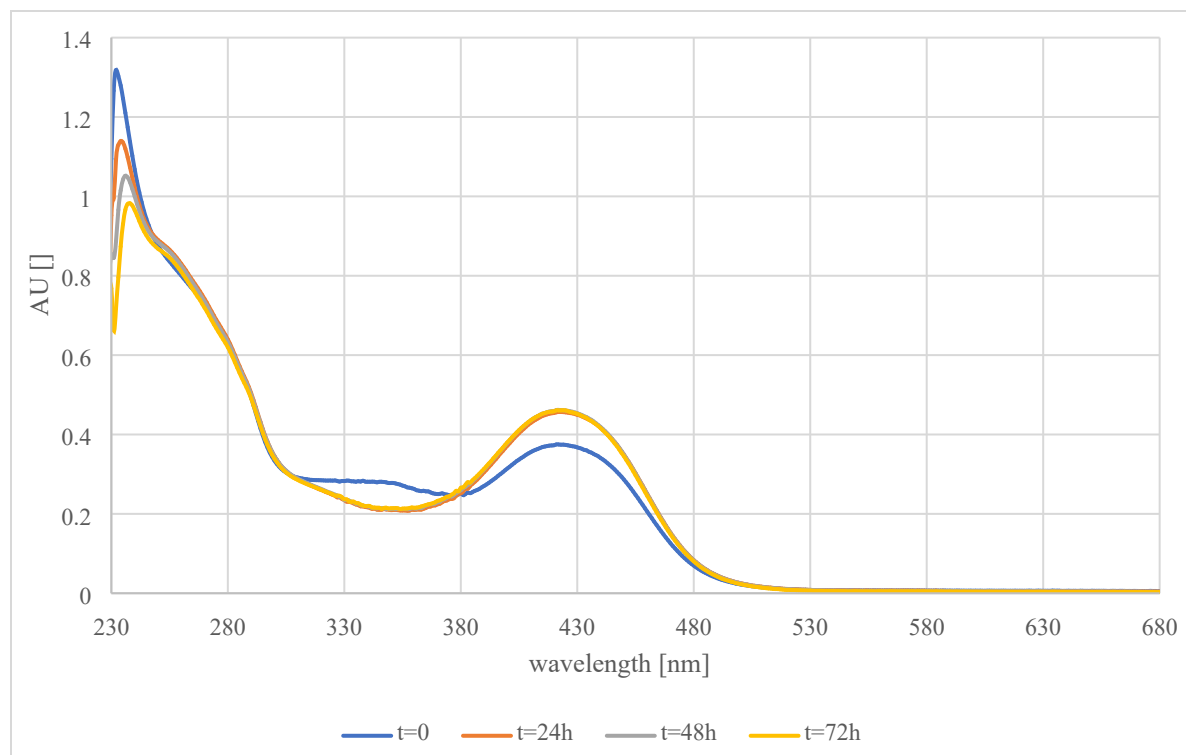

**Figure S10.** UV-vis stability measurement of **5** over 72 h,  $c = 30 \mu\text{M}$  in DMSO/H<sub>2</sub>O 1/99.

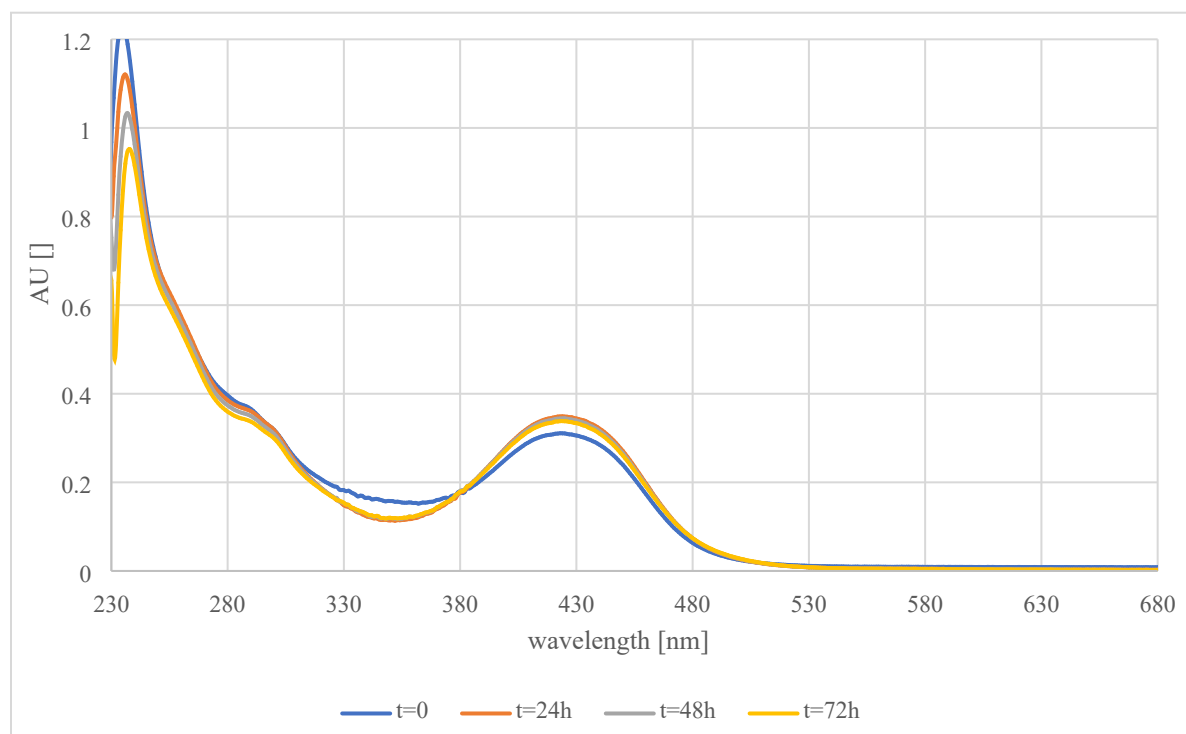

**Figure S11.** UV-vis stability measurement of **6** over 72 h,  $c = 30 \mu\text{M}$  in DMSO/H<sub>2</sub>O 1/99.

- NMR spectra

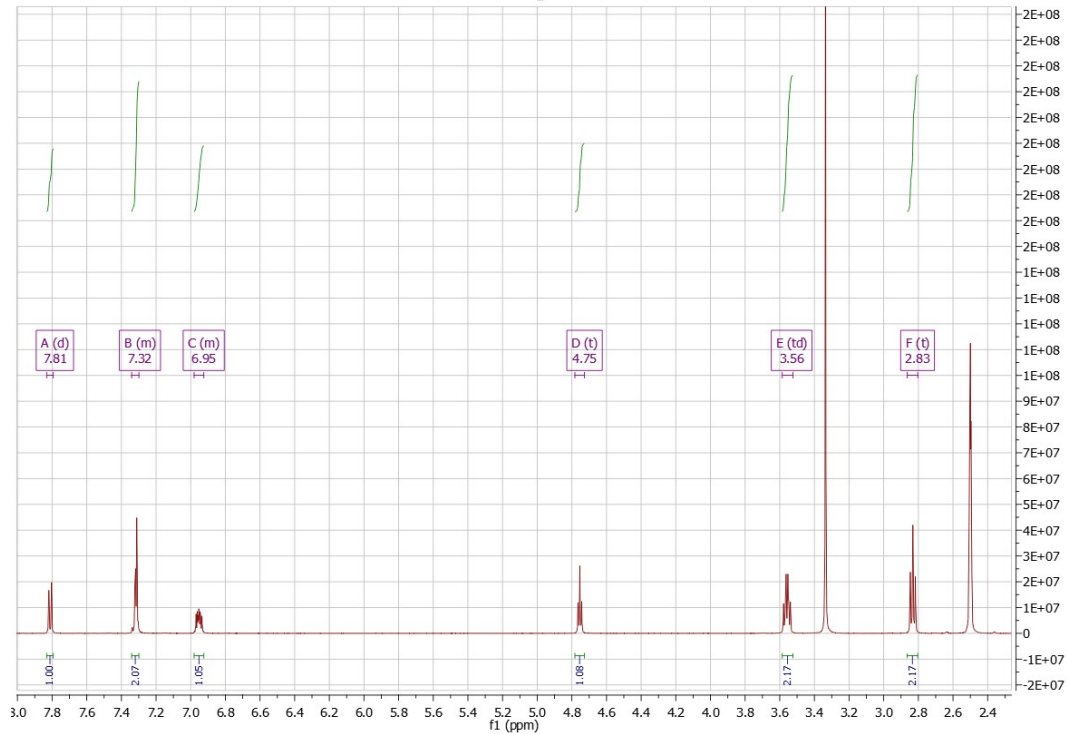

Figure S12. <sup>1</sup>H NMR spectrum of X1 in DMSO-*d*<sub>6</sub>.

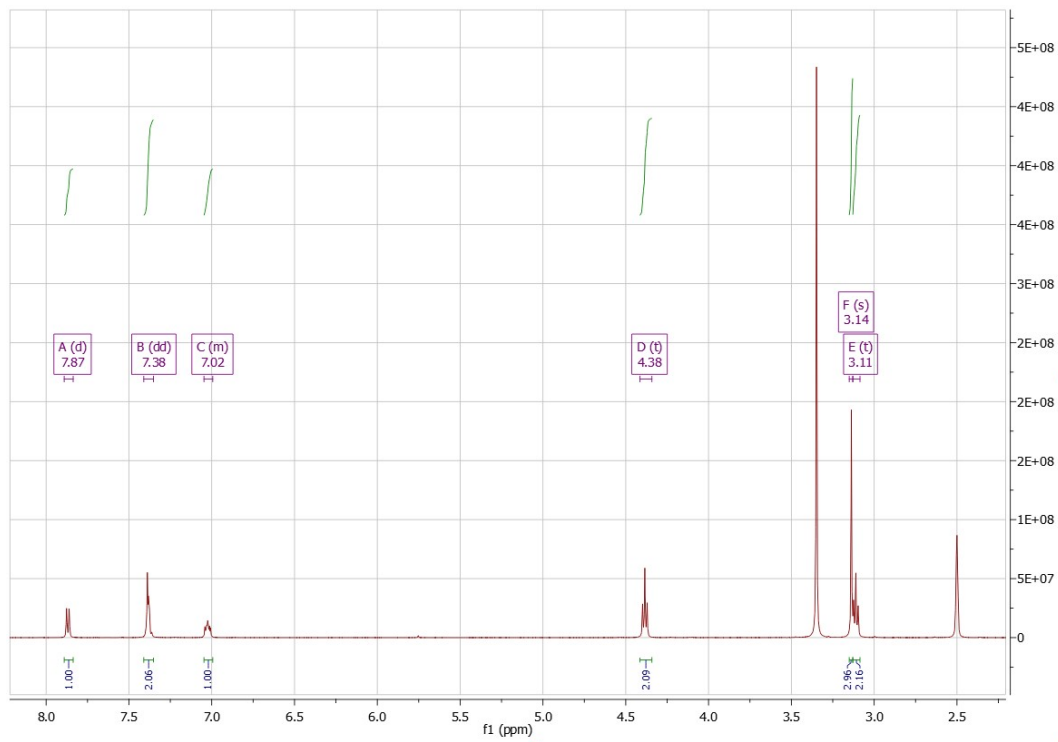

Figure S13. <sup>1</sup>H NMR spectrum of X2 in DMSO-*d*<sub>6</sub>.

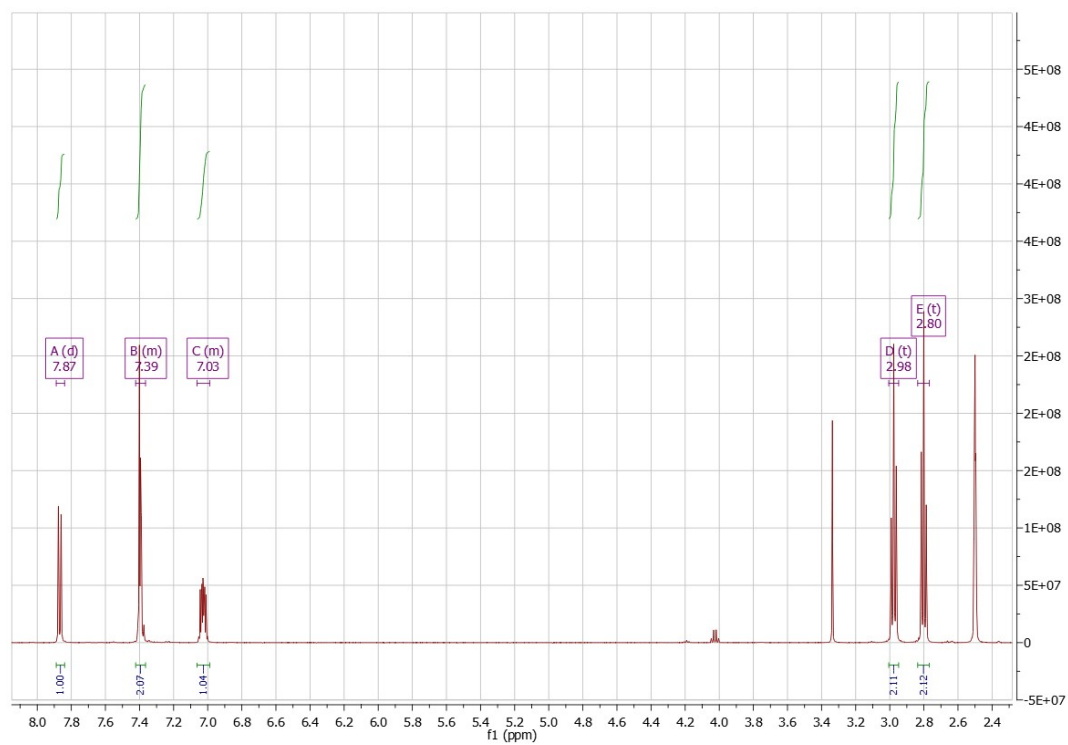

**Figure S14.**  $^1\text{H}$  NMR spectrum of X3 in  $\text{DMSO-}d_6$ .

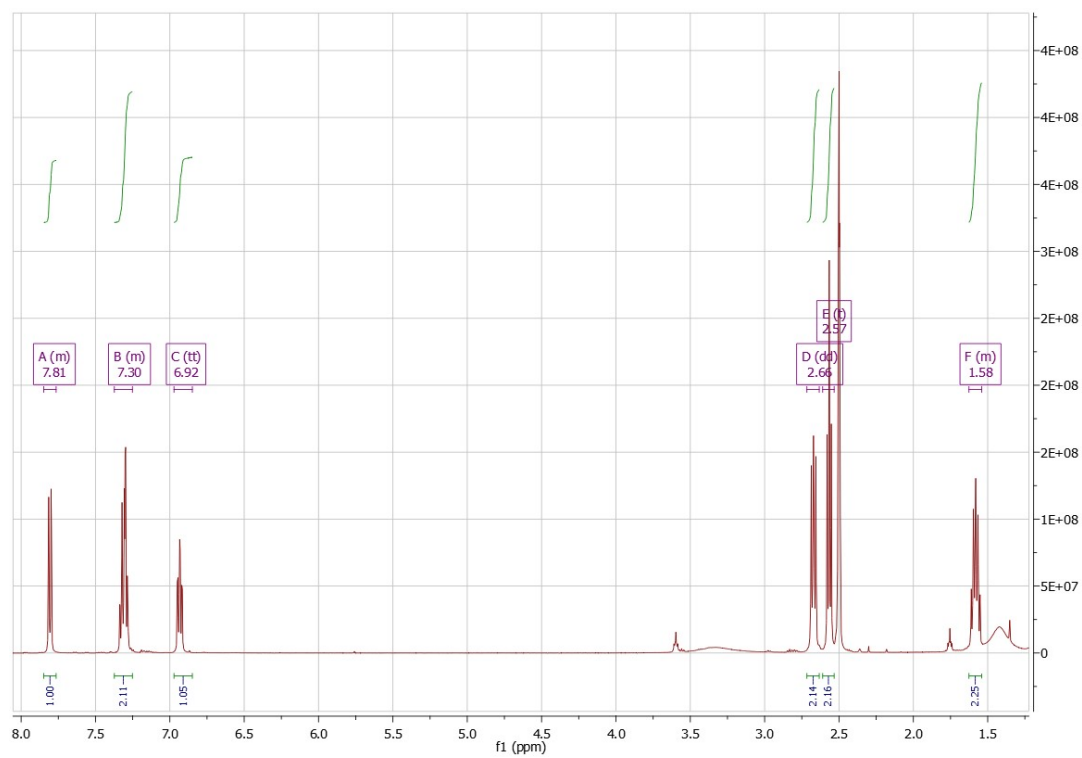

**Figure S15.**  $^1\text{H}$  NMR spectrum of X4 in  $\text{DMSO-}d_6$ .

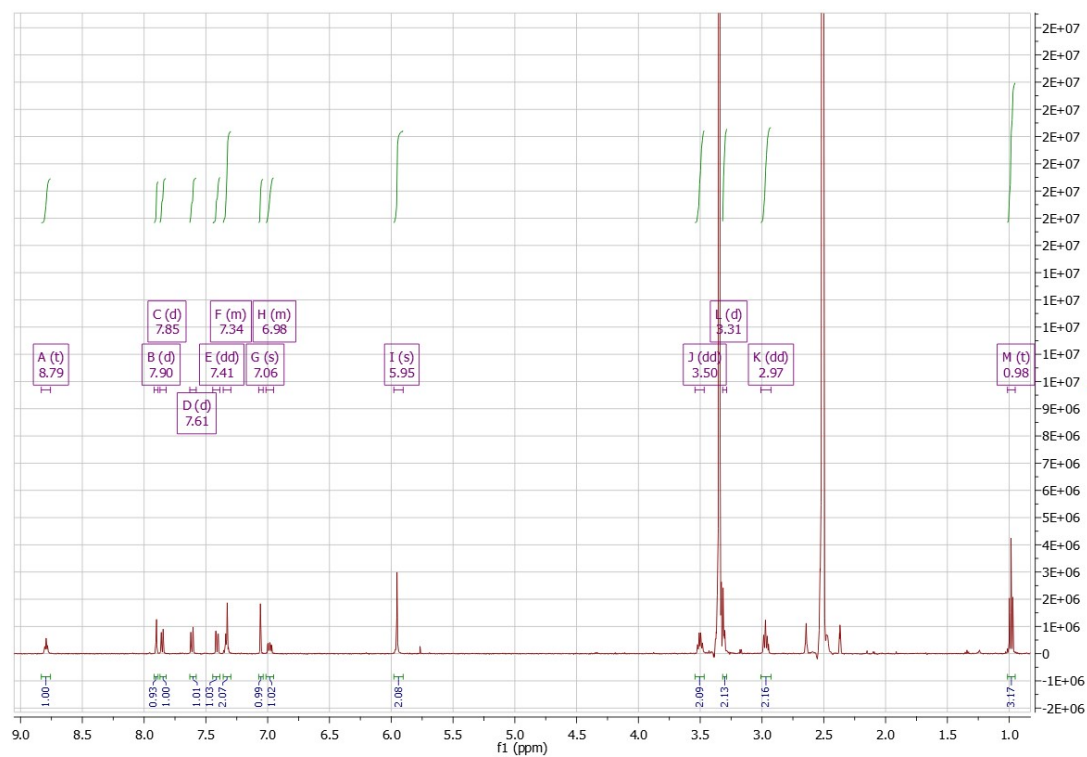

Figure S16.  $^1\text{H}$  NMR spectrum of **IIb** in  $\text{DMSO-}d_6$ .

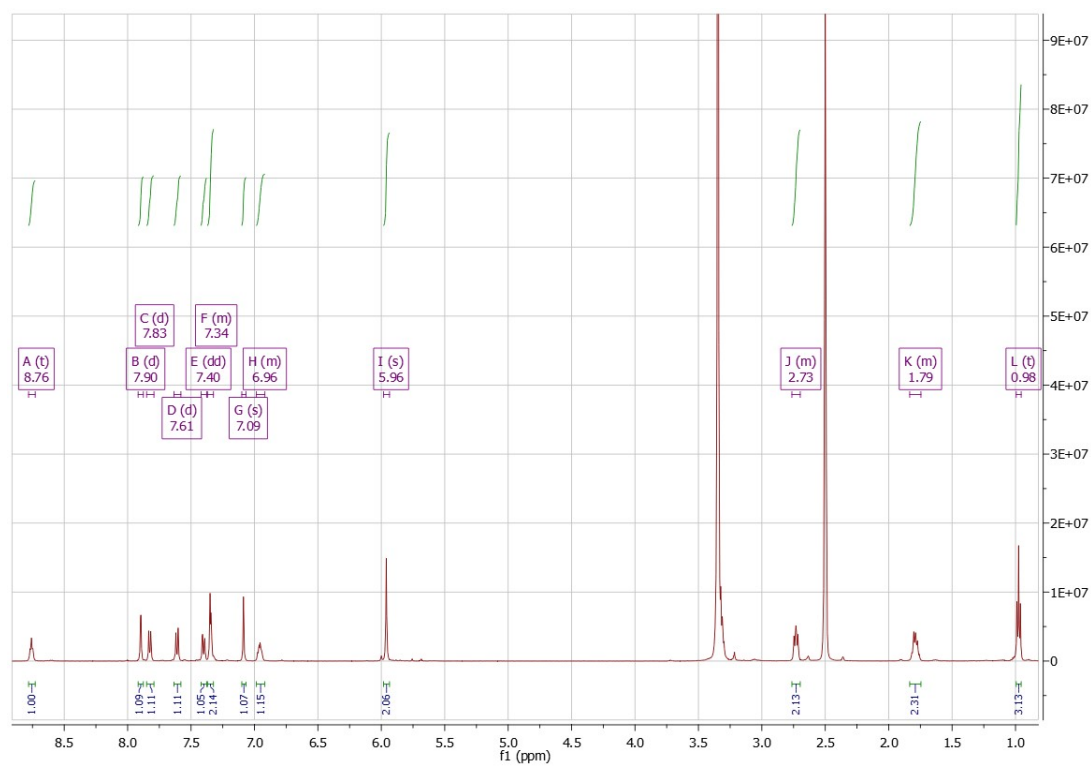

Figure S17.  $^1\text{H}$  NMR spectrum of **IIc** in  $\text{DMSO-}d_6$ .

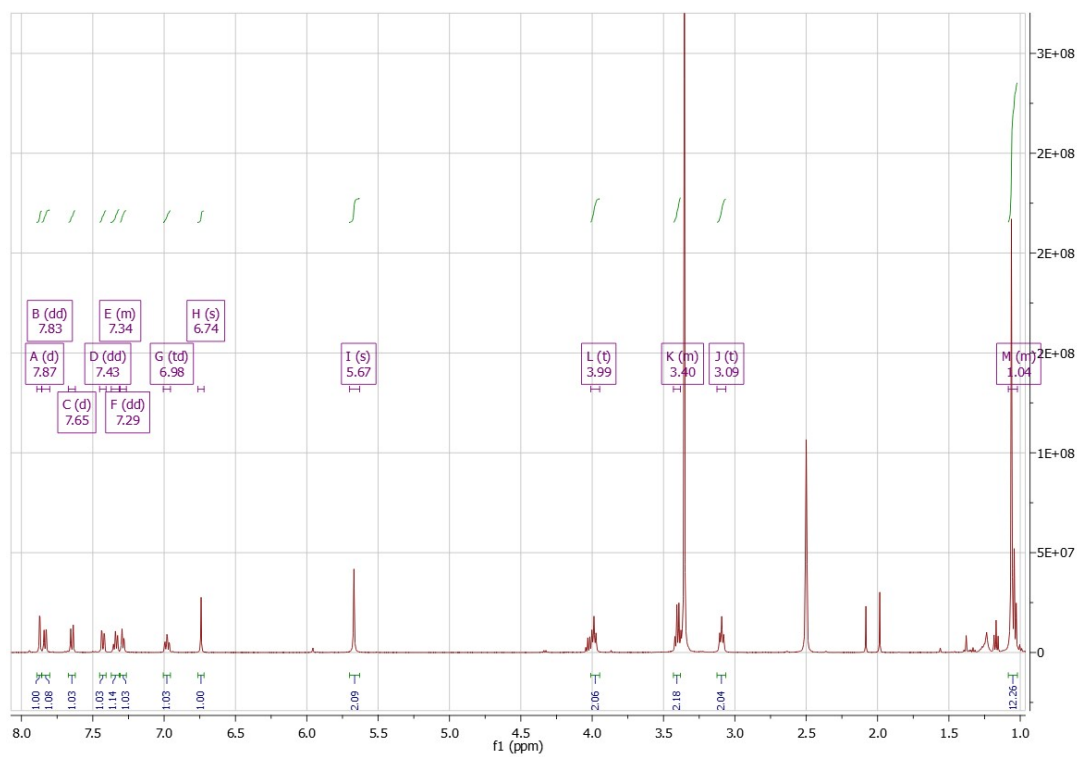

Figure S18.  $^1\text{H}$  NMR spectrum of **IIIb** in  $\text{DMSO-}d_6$ .

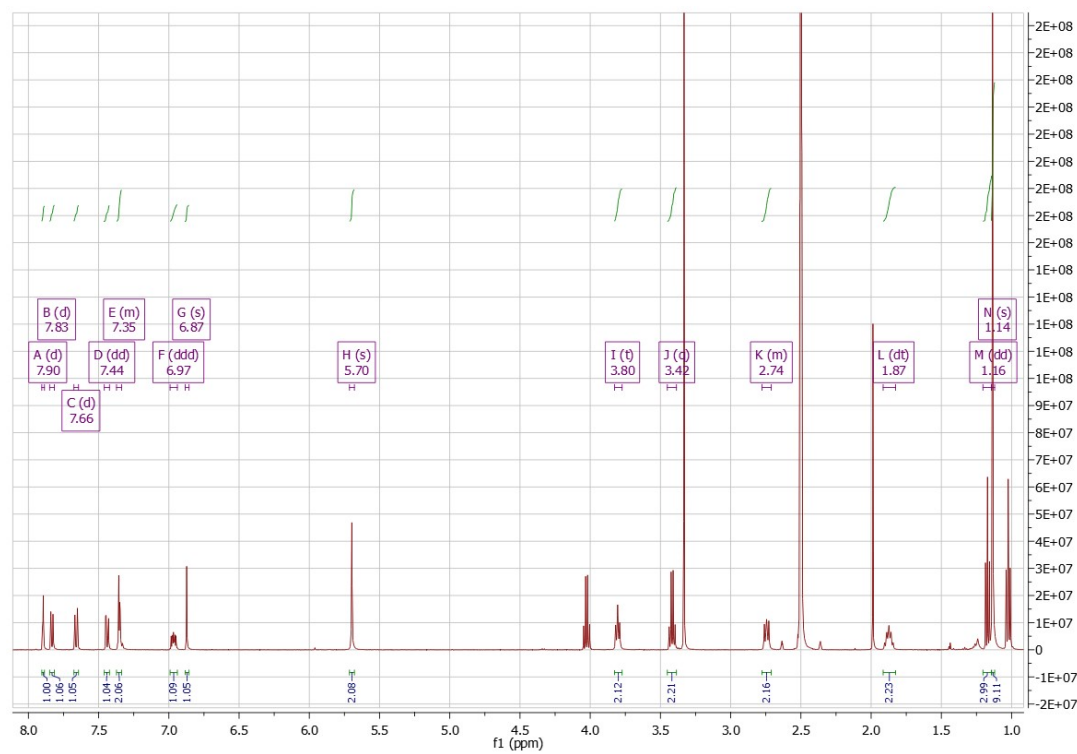

Figure S19.  $^1\text{H}$  NMR spectrum of **IIIc** in  $\text{DMSO-}d_6$ .



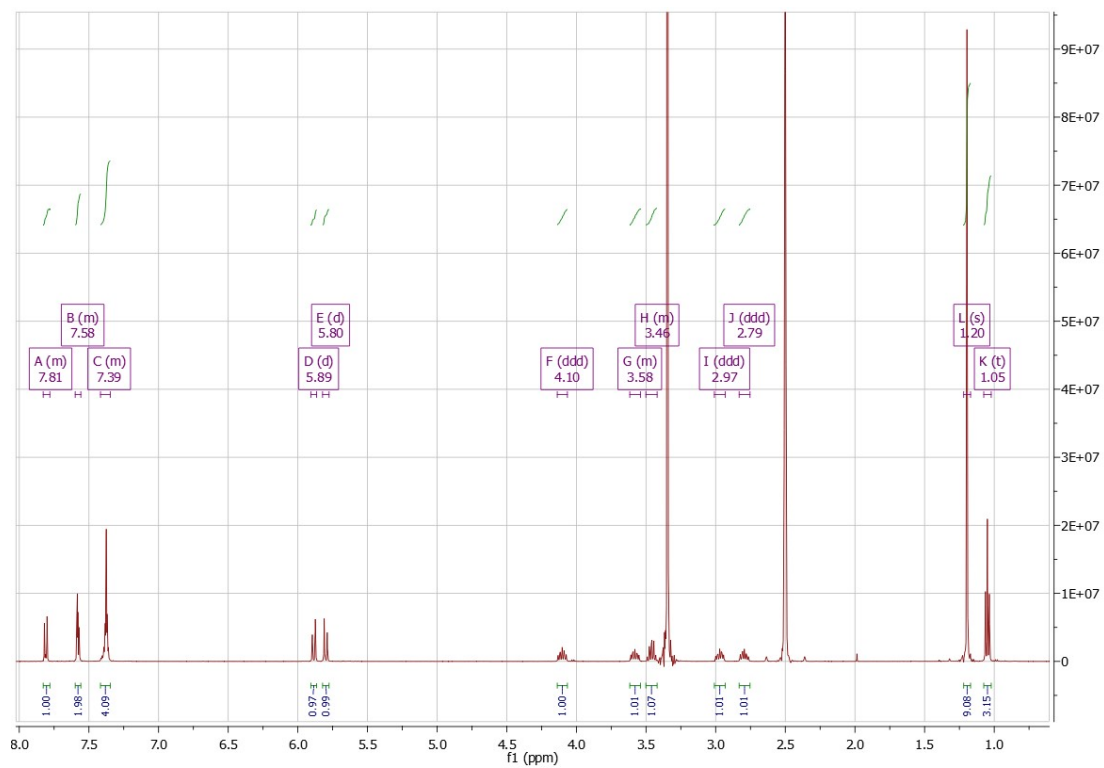

**Figure S20.**  $^1\text{H}$  NMR spectrum of IVb in  $\text{DMSO-}d_6$ .

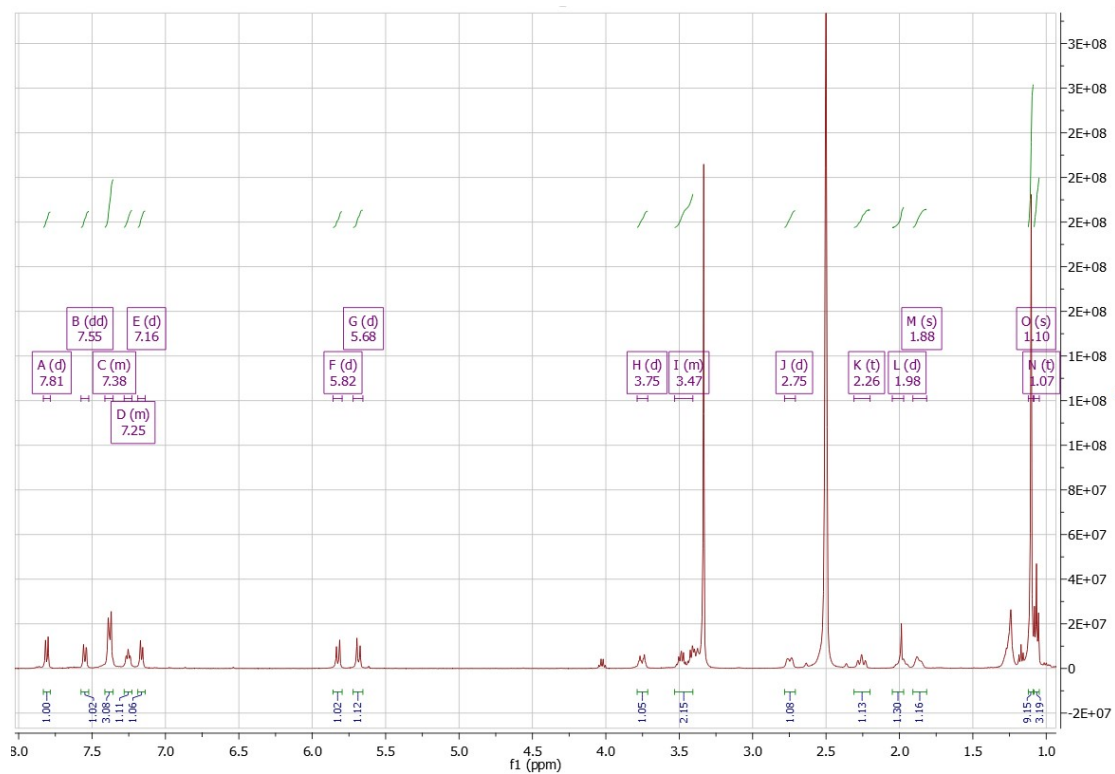

**Figure S21.**  $^1\text{H}$  NMR spectrum of IVd in  $\text{DMSO-}d_6$ .

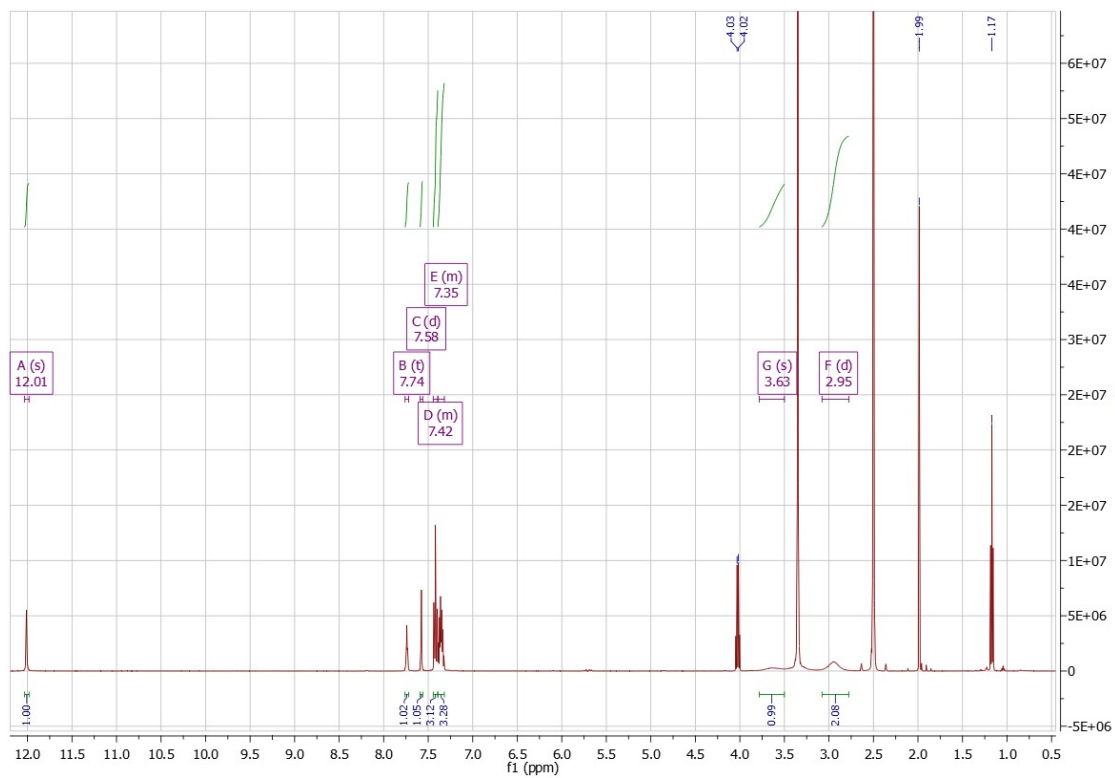

**Figure S22.**  $^1\text{H}$  NMR spectrum of **Vb** in  $\text{DMSO-}d_6$ .

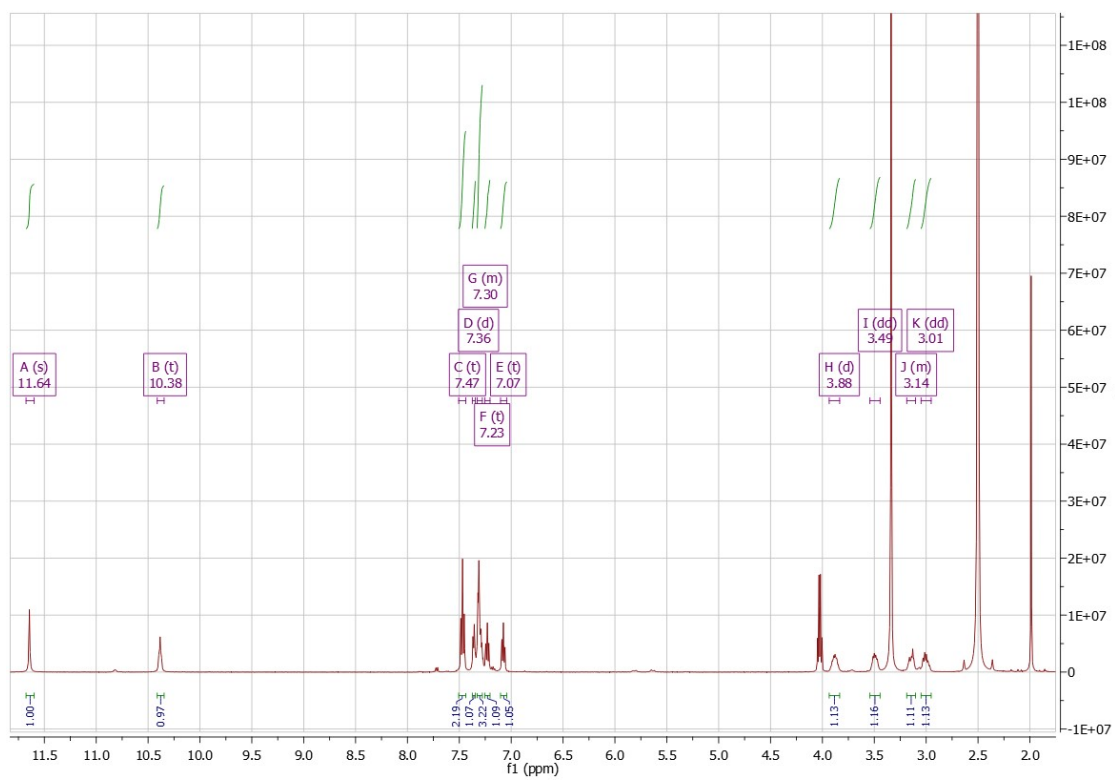

**Figure S23.**  $^1\text{H}$  NMR spectrum of **VIa** in  $\text{DMSO-}d_6$ .

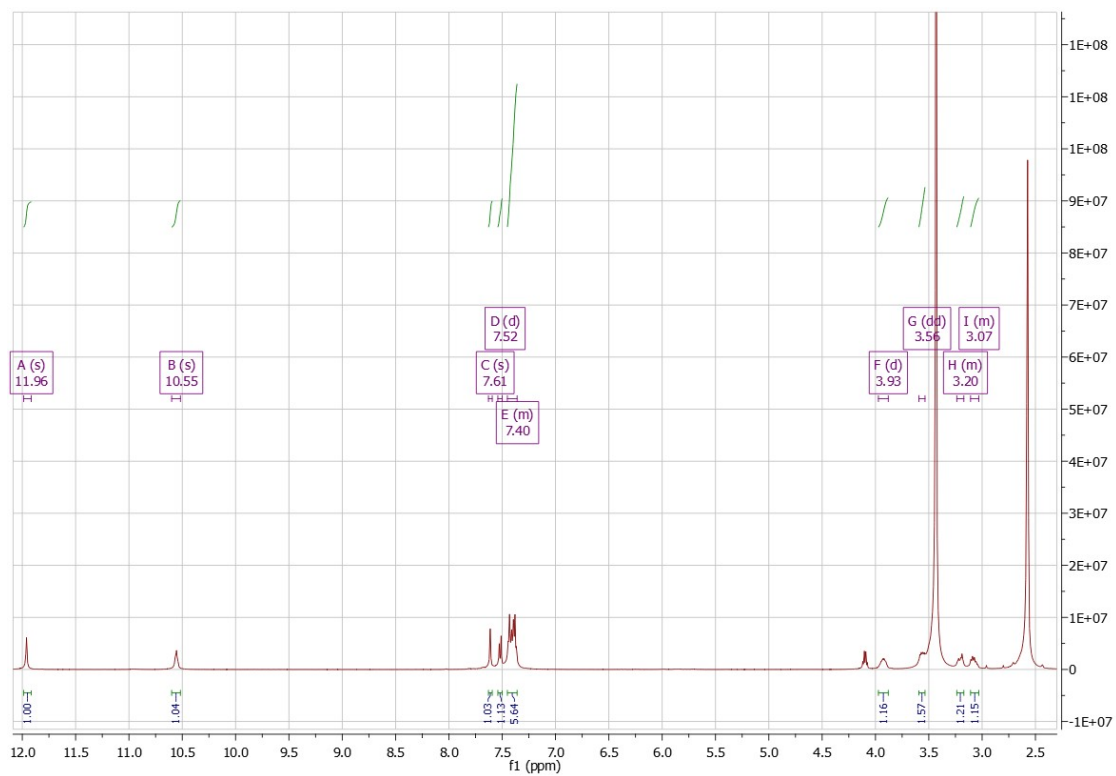

**Figure S24.** <sup>1</sup>H NMR spectrum of VIb in DMSO-*d*<sub>6</sub>.

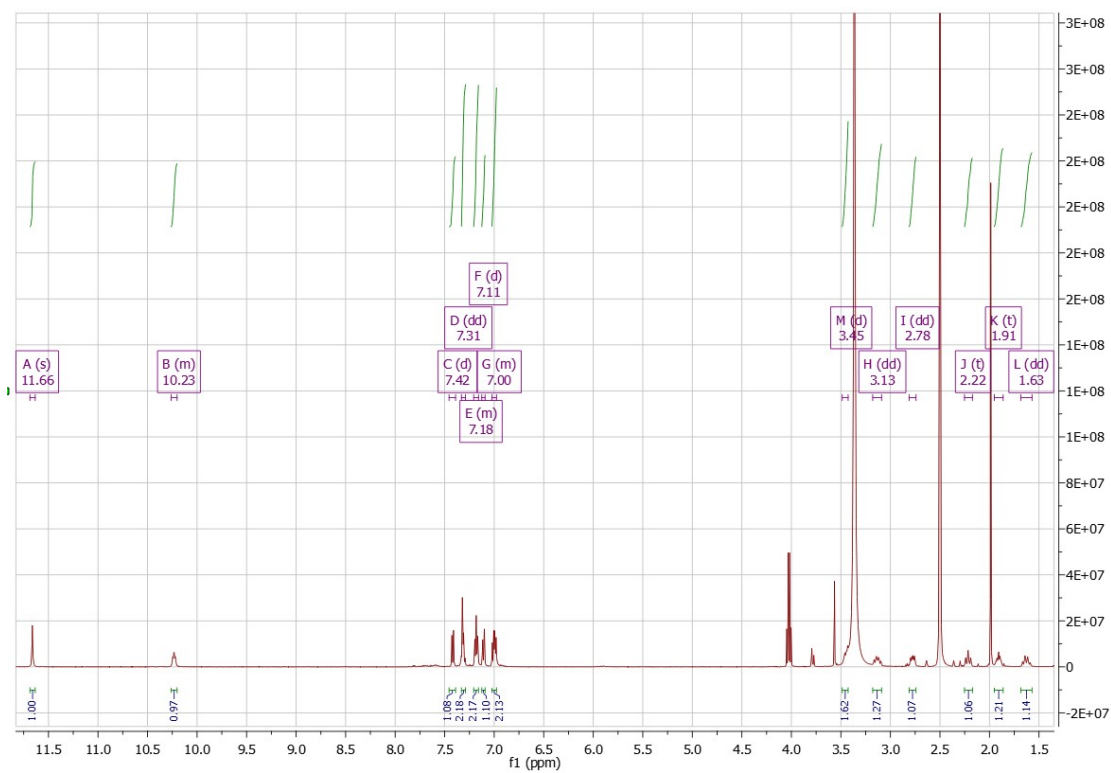

**Figure S25.** <sup>1</sup>H NMR spectrum of VIc in DMSO-*d*<sub>6</sub>.

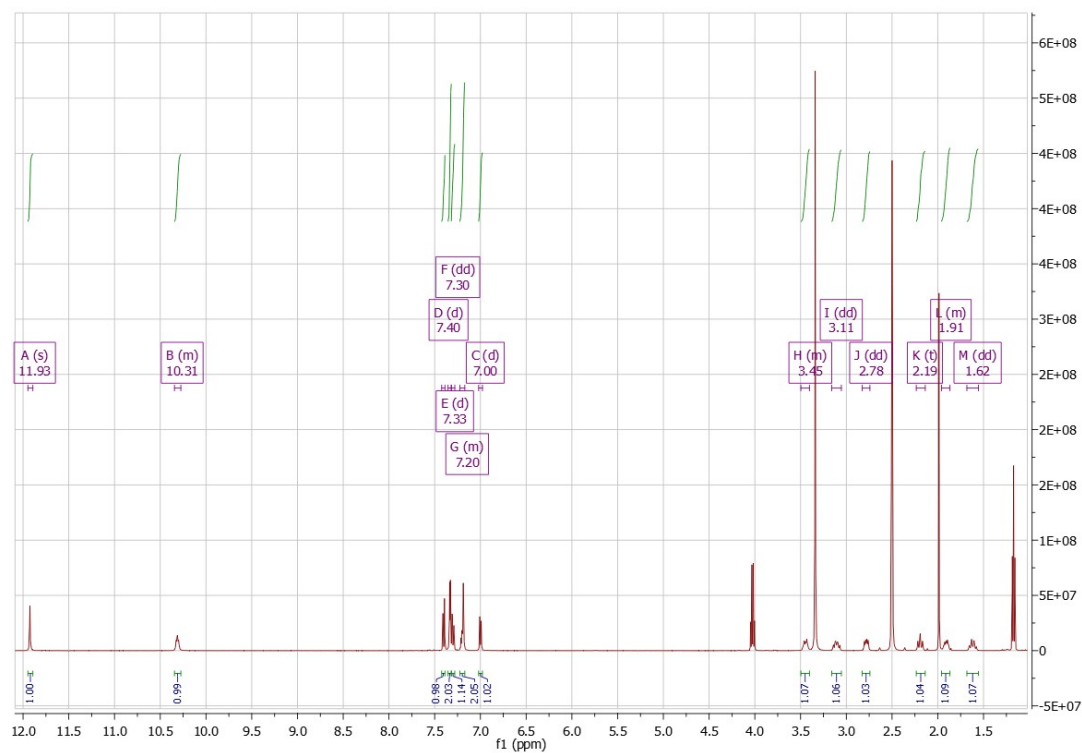

**Figure S26.**  $^1\text{H}$  NMR spectrum of VIId in  $\text{DMSO-}d_6$ .

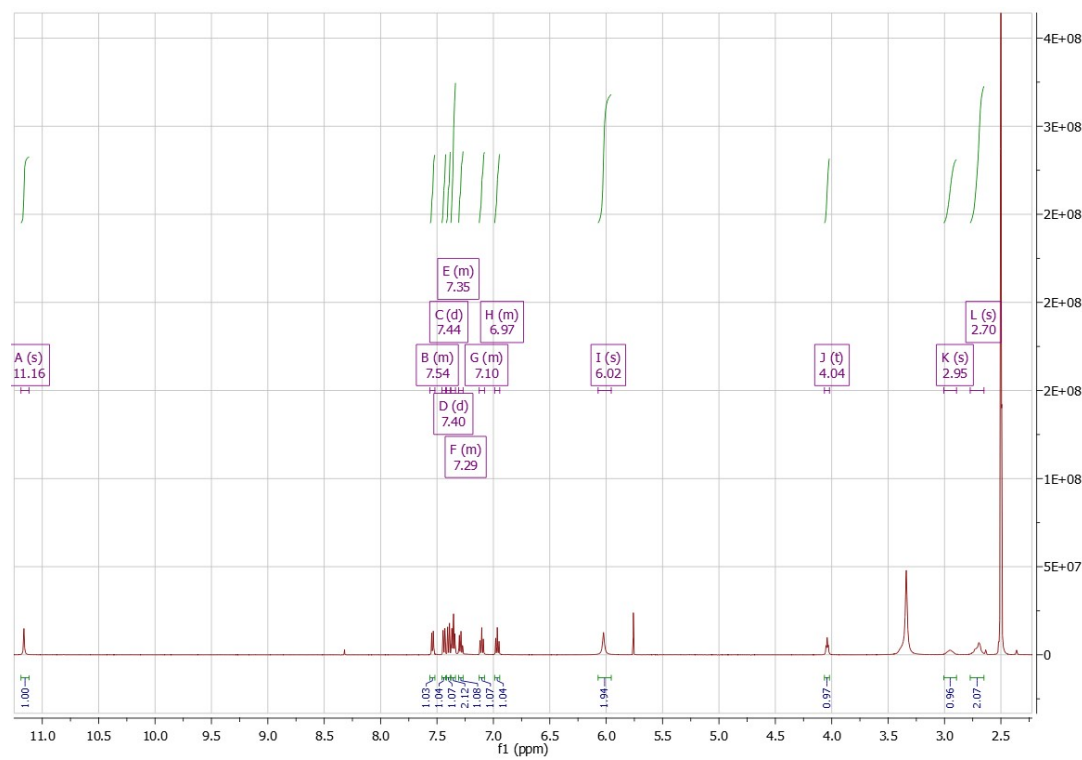

**Figure S27.**  $^1\text{H}$  NMR spectrum of VIIa in  $\text{DMSO-}d_6$ .

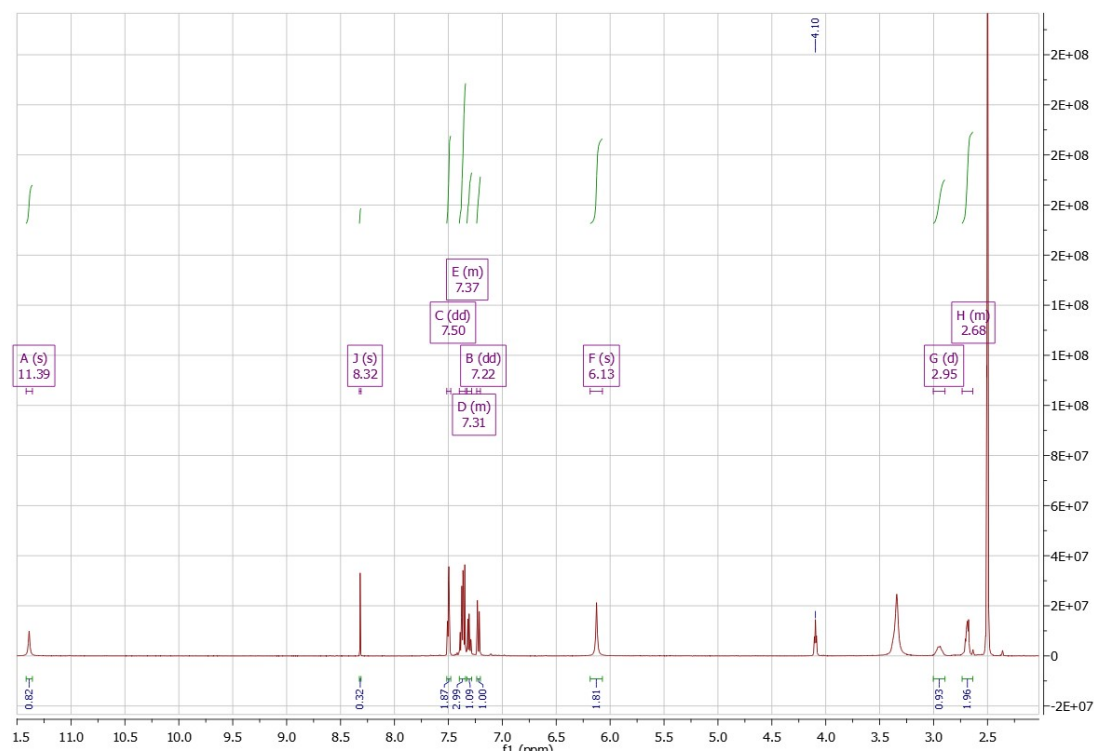

**Figure S28.**  $^1\text{H}$  NMR spectrum of VIIb in  $\text{DMSO}-d_6$ .

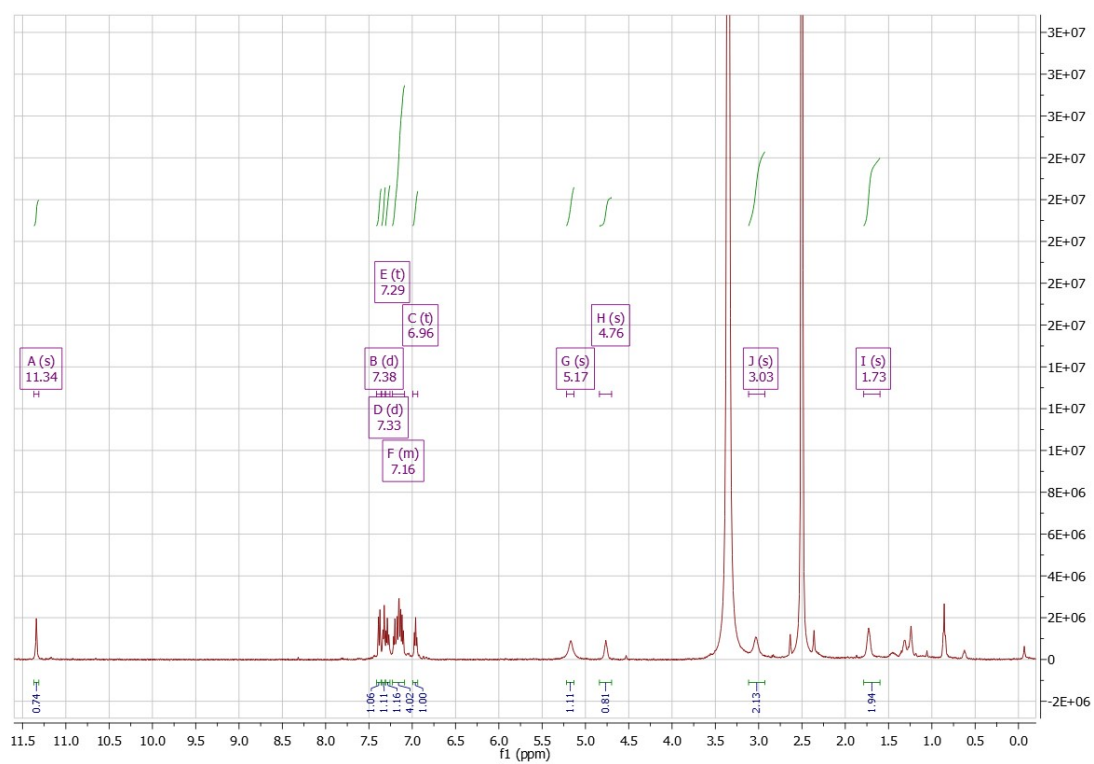

**Figure S29.**  $^1\text{H}$  NMR spectrum of VIIc in  $\text{DMSO}-d_6$ .

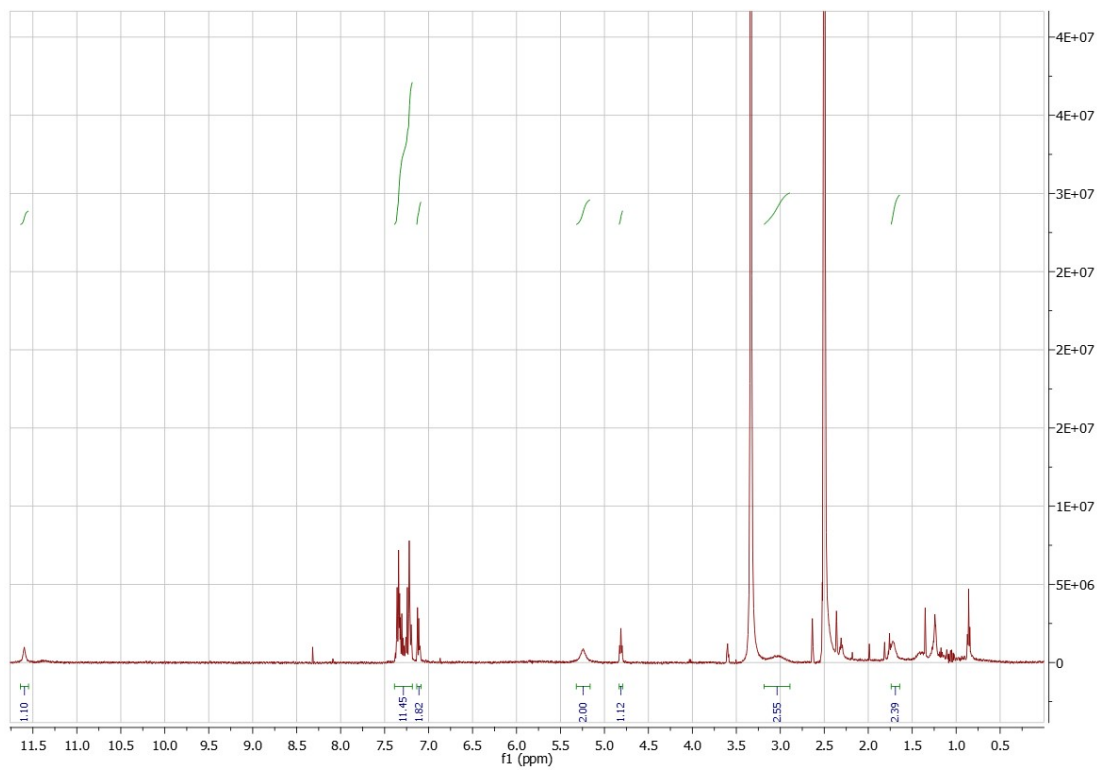

**Figure S30.**  $^1\text{H}$  NMR spectrum of **VIId** in  $\text{DMSO-}d_6$ .

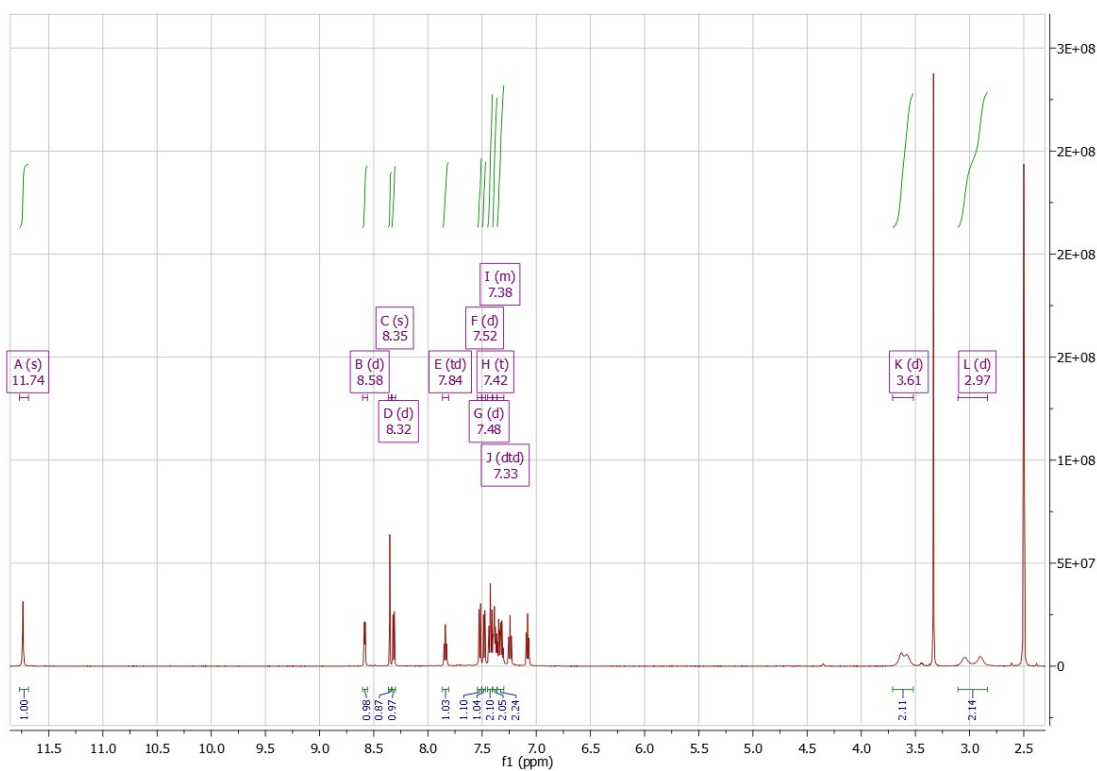

**Figure S31.**  $^1\text{H}$  NMR spectrum of **HL<sup>1</sup>** in  $\text{DMSO-}d_6$ .

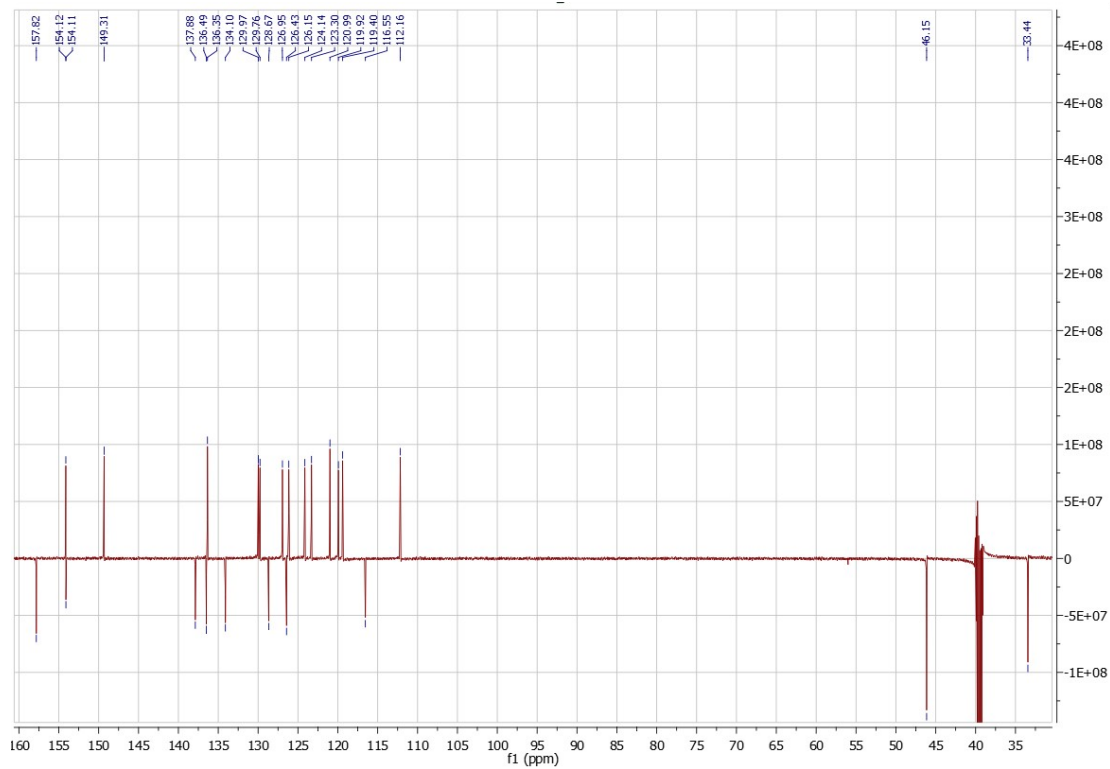

Figure S32.  $^{13}\text{C}$  NMR spectrum of **HL**<sup>1</sup> in  $\text{DMSO-}d_6$ .

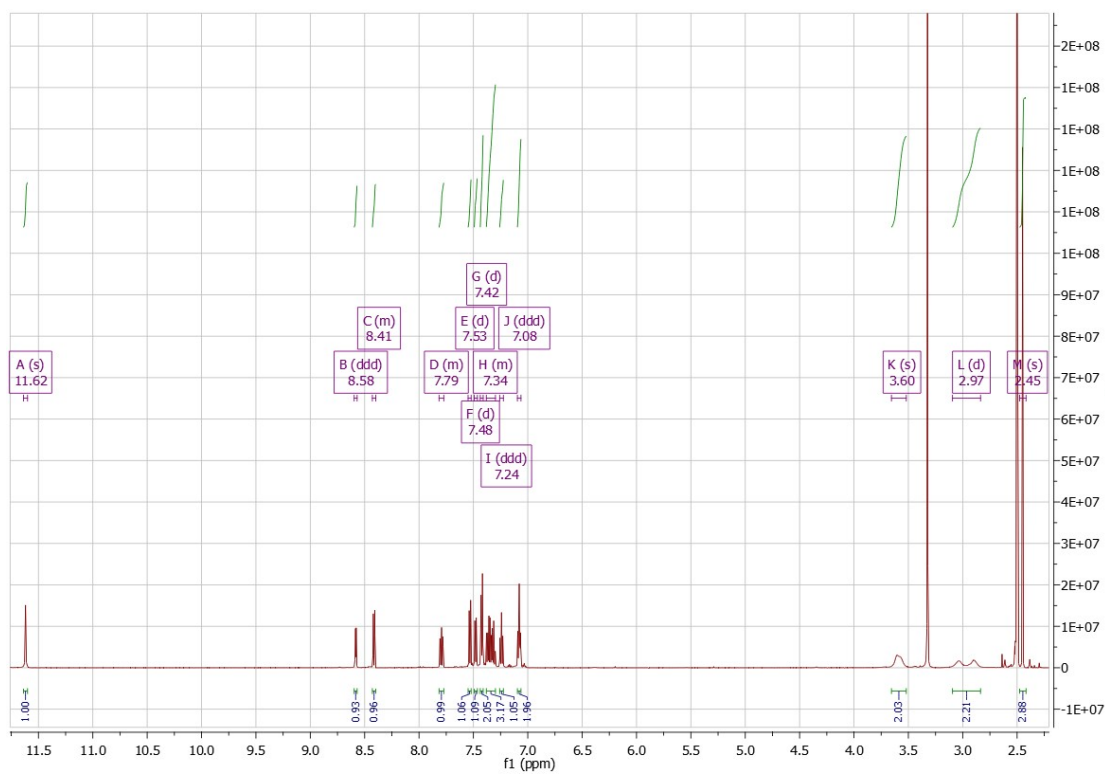

Figure S33.  $^1\text{H}$  NMR spectrum of **HL**<sup>2</sup> in  $\text{DMSO-}d_6$ .

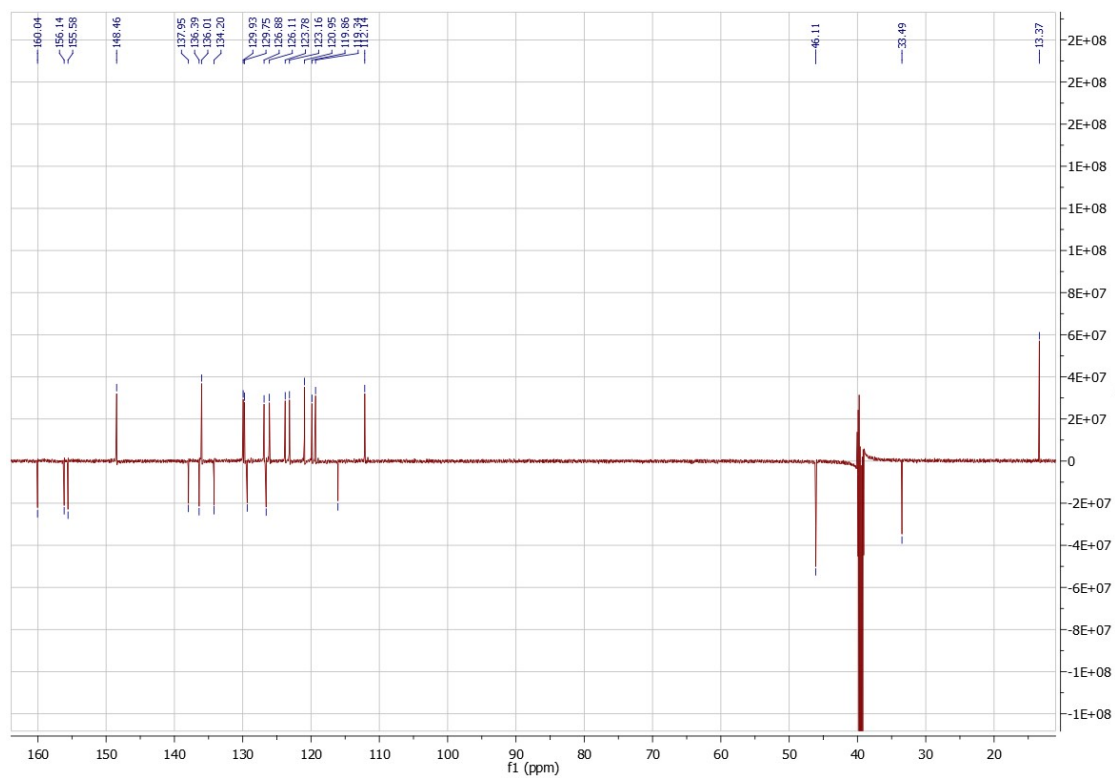

Figure S34.  $^{13}\text{C}$  NMR spectrum of  $\text{HL}^2$  in  $\text{DMSO-}d_6$ .

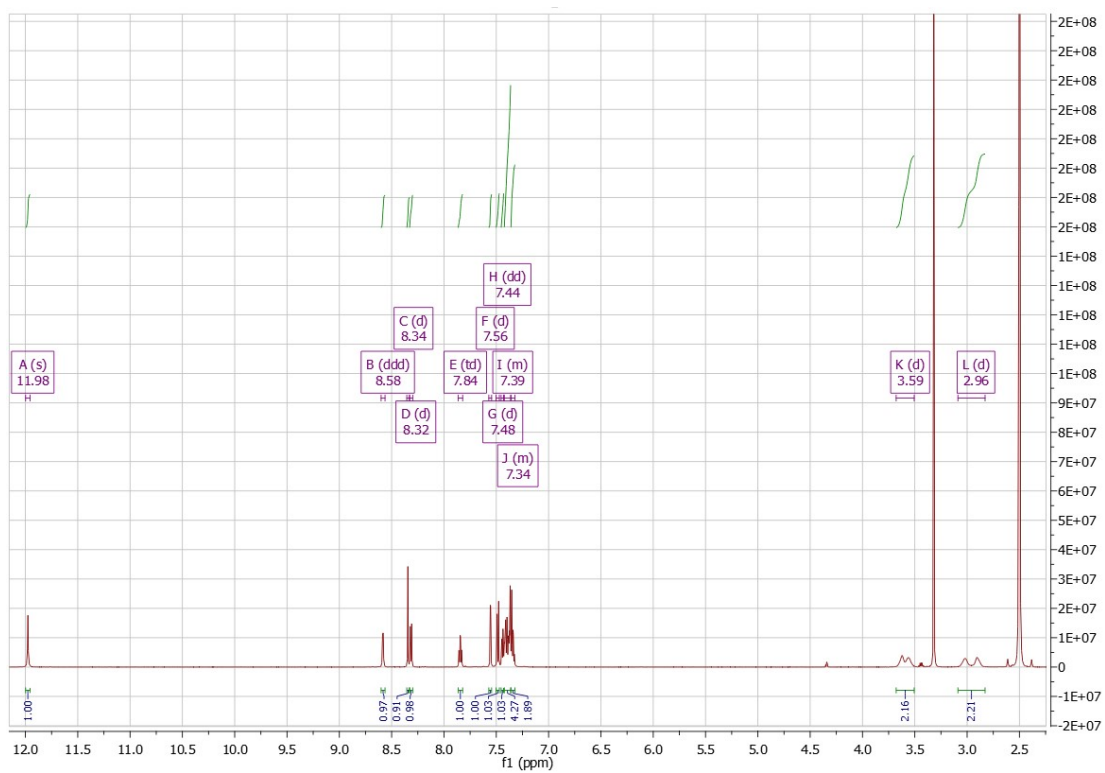

Figure S35.  $^1\text{H}$  NMR spectrum of  $\text{HL}^3$  in  $\text{DMSO-}d_6$ .



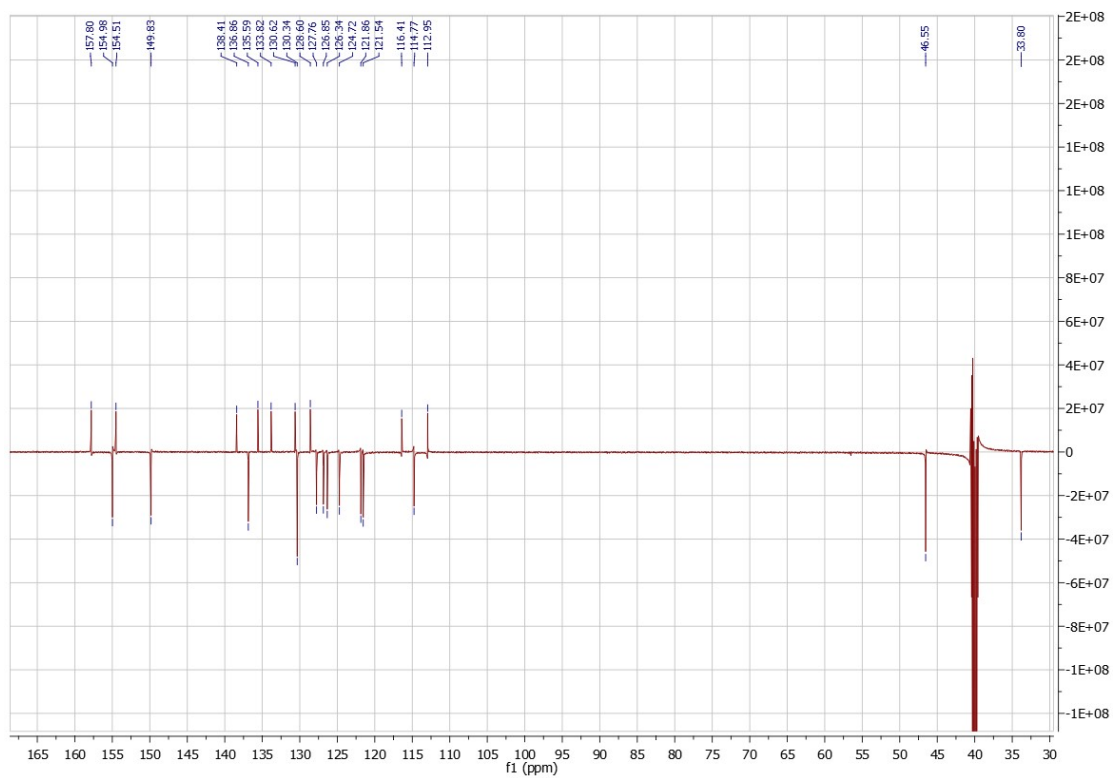

Figure S36.  $^{13}\text{C}$  NMR spectrum of  $\text{HL}^3$  in  $\text{DMSO-}d_6$ .

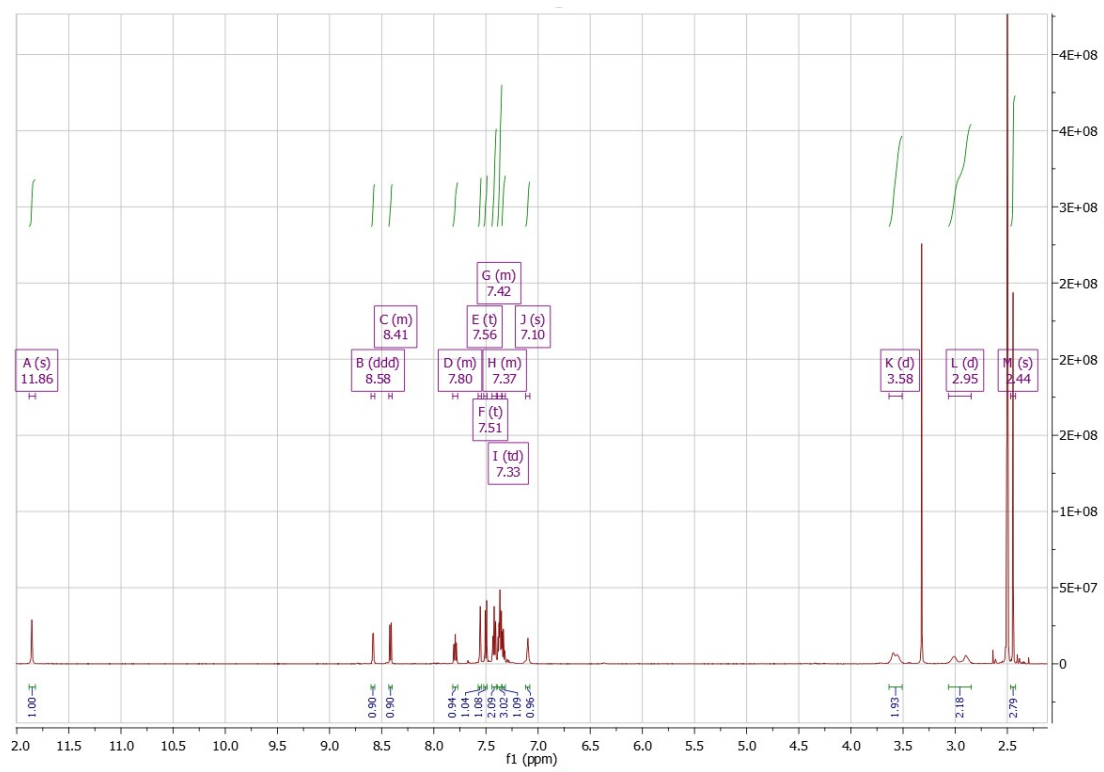

Figure S37.  $^1\text{H}$  NMR spectrum of  $\text{HL}^4$  in  $\text{DMSO-}d_6$ .

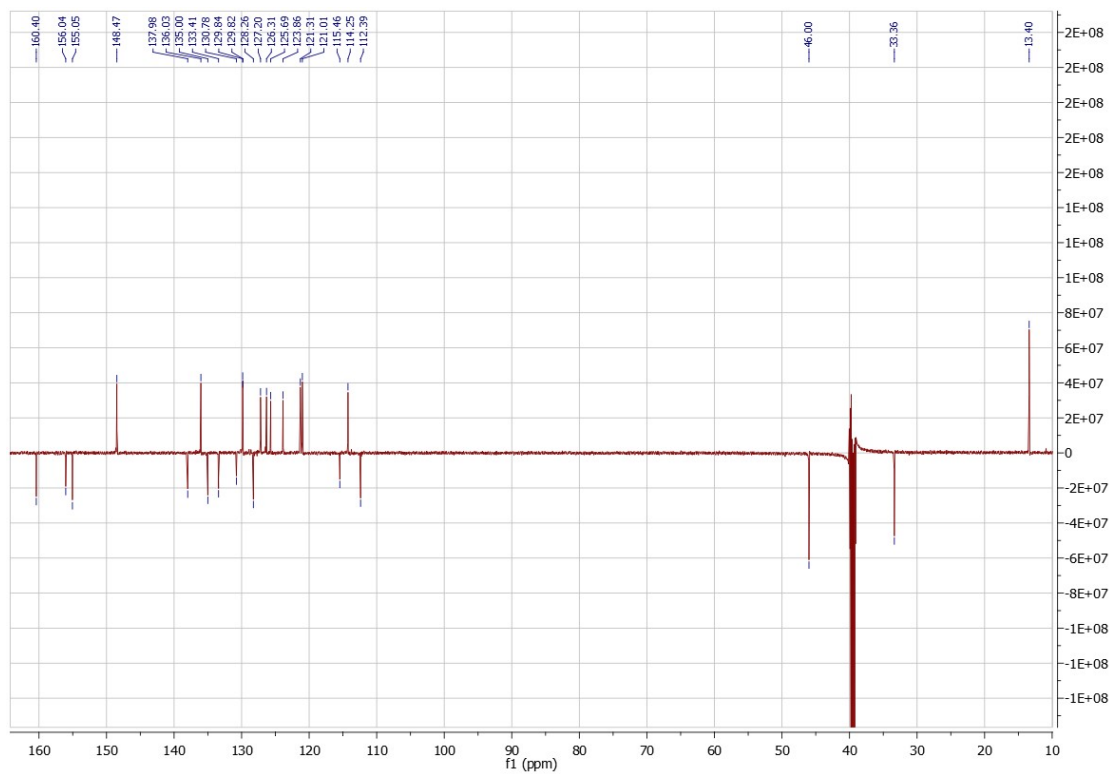

Figure S38.  $^{13}\text{C}$  NMR spectrum of  $\text{HL}^4$  in  $\text{DMSO-}d_6$ .

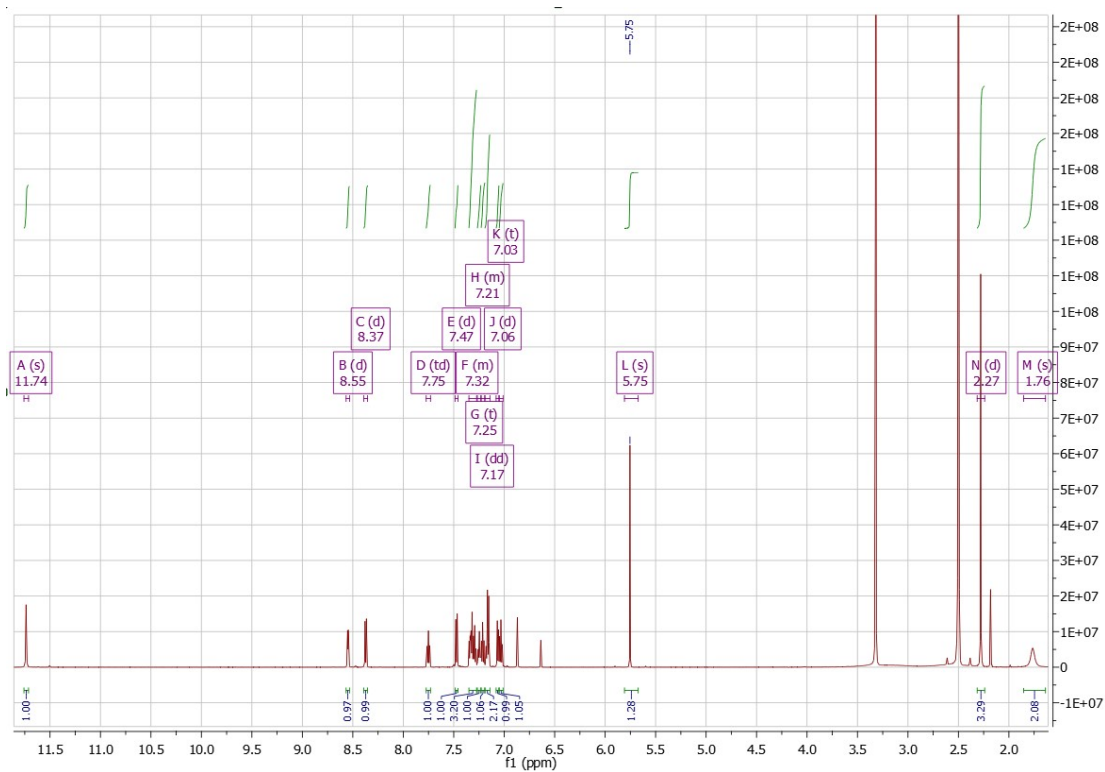

Figure S39.  $^1\text{H}$  NMR spectrum of  $\text{HL}^5$  in  $\text{DMSO-}d_6$ .

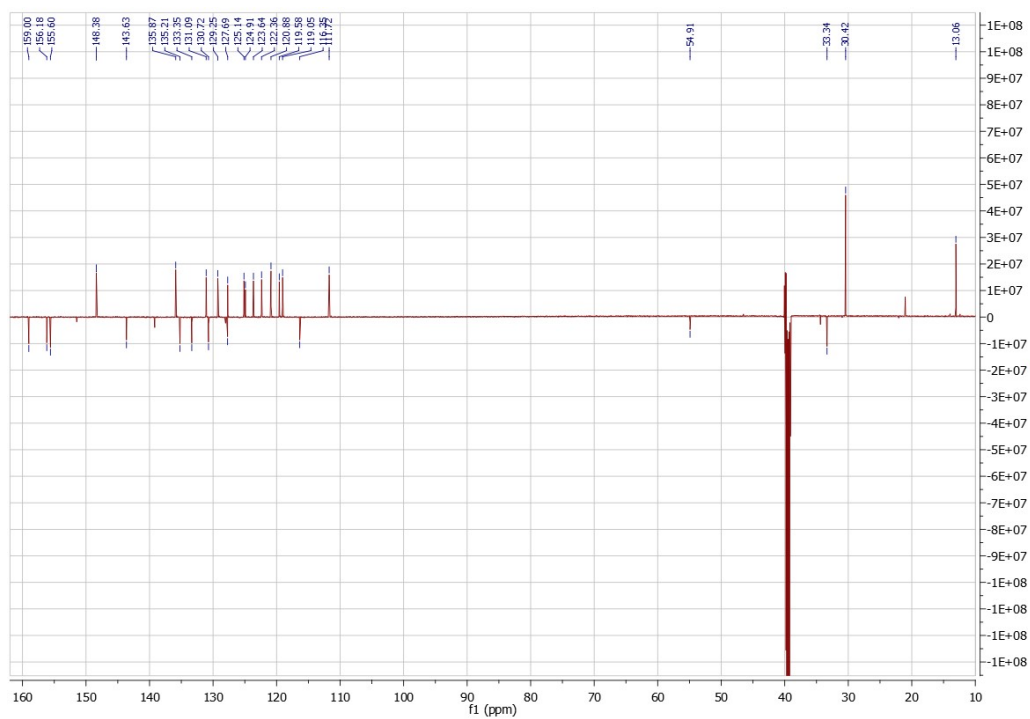

Figure S40.  $^{13}\text{C}$  NMR spectrum of **HL**<sup>5</sup> in  $\text{DMSO-}d_6$ .

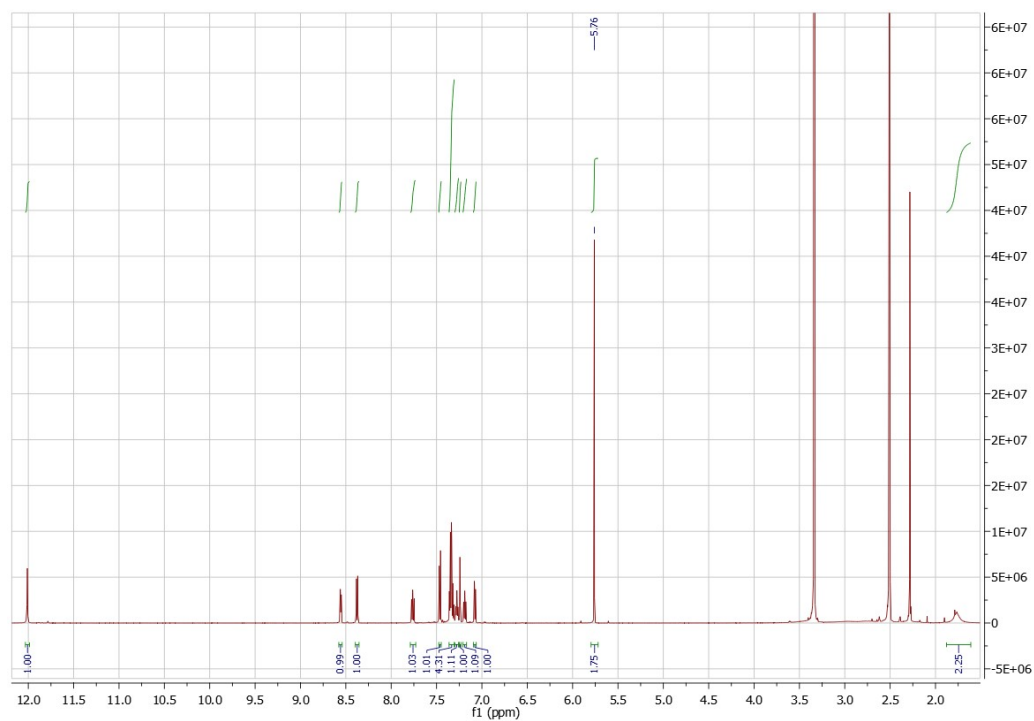

Figure S41.  $^1\text{H}$  NMR spectrum of **HL**<sup>6</sup> in  $\text{DMSO-}d_6$ .

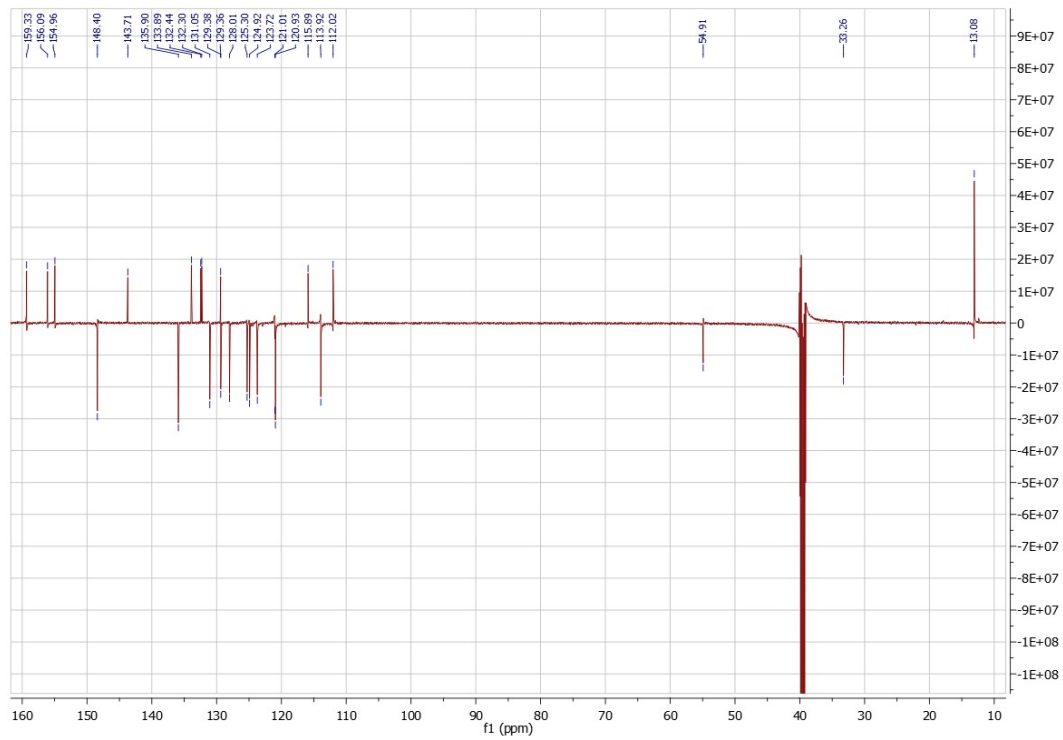

**Figure S42.**  $^{13}\text{C}$  NMR spectrum of  $\text{HL}^6$  in  $\text{DMSO-}d_6$ .

- ESI mass spectra

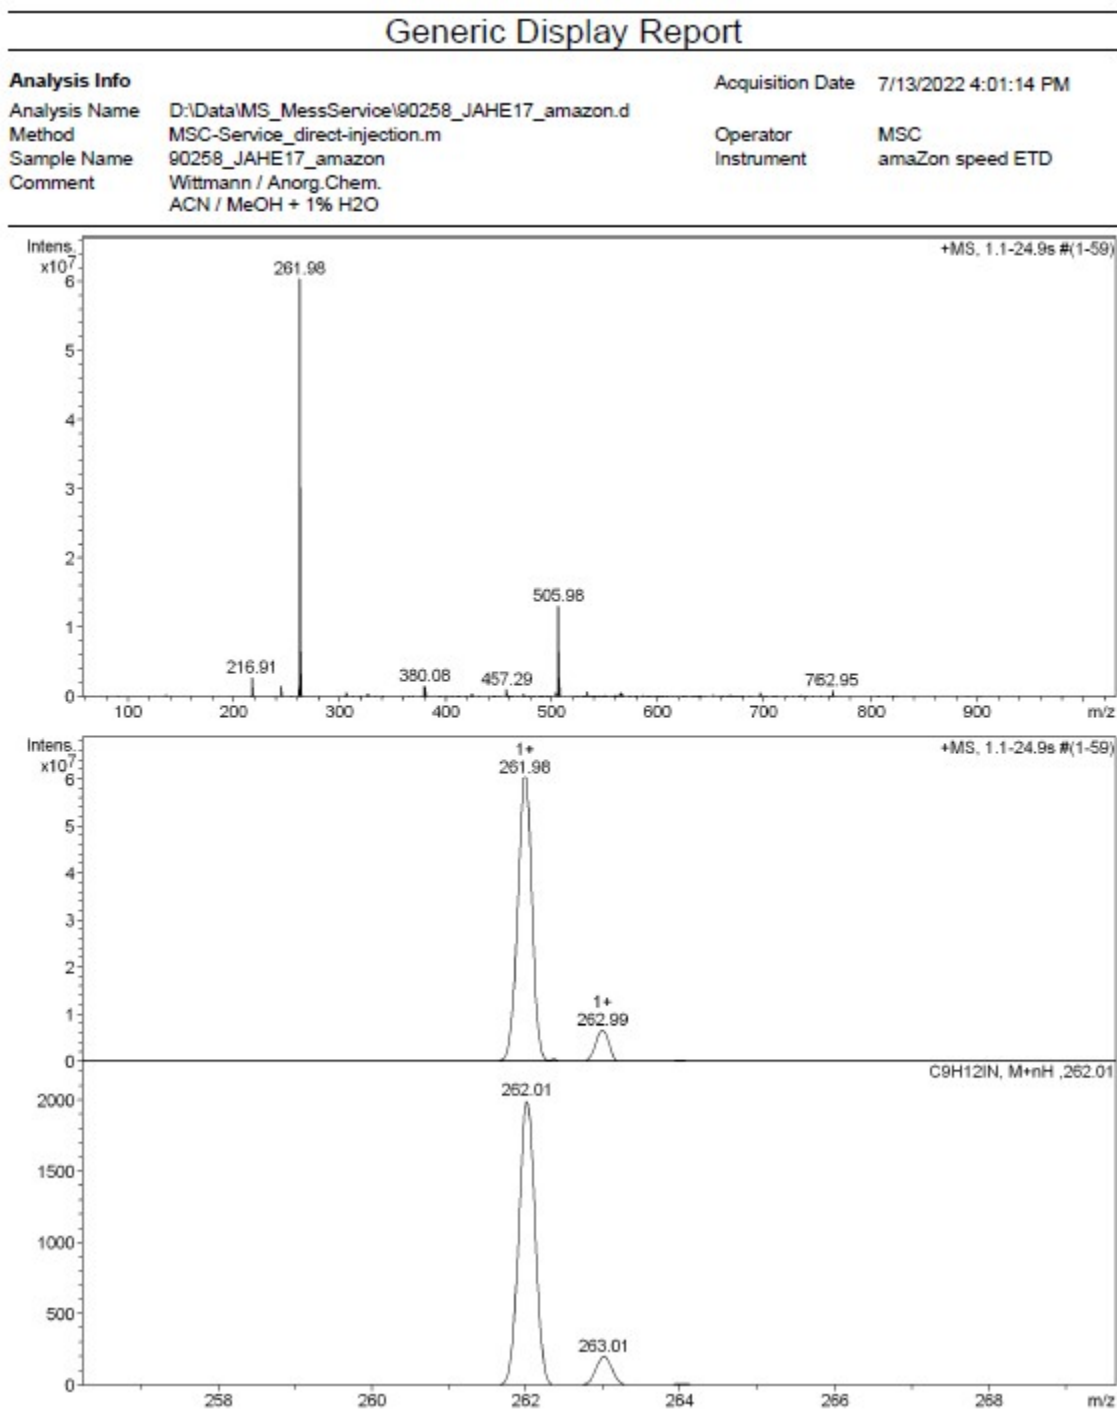

**Figure S43.** ESI mass spectrum of X4 in positive ion mode.

## Generic Display Report

### Analysis Info

Analysis Name D:\Data\MS\_MessService\90179\_JAHE13\_amazon.d  
Method MSC-Service\_direct-injection.m  
Sample Name 90179\_JAHE13\_amazon  
Comment Wittmann / Anorg. Chem.  
ACN / MeOH + 1% H<sub>2</sub>O

Acquisition Date 7/8/2022 11:48:44 AM

Operator MSC  
Instrument amaZon speed ETD

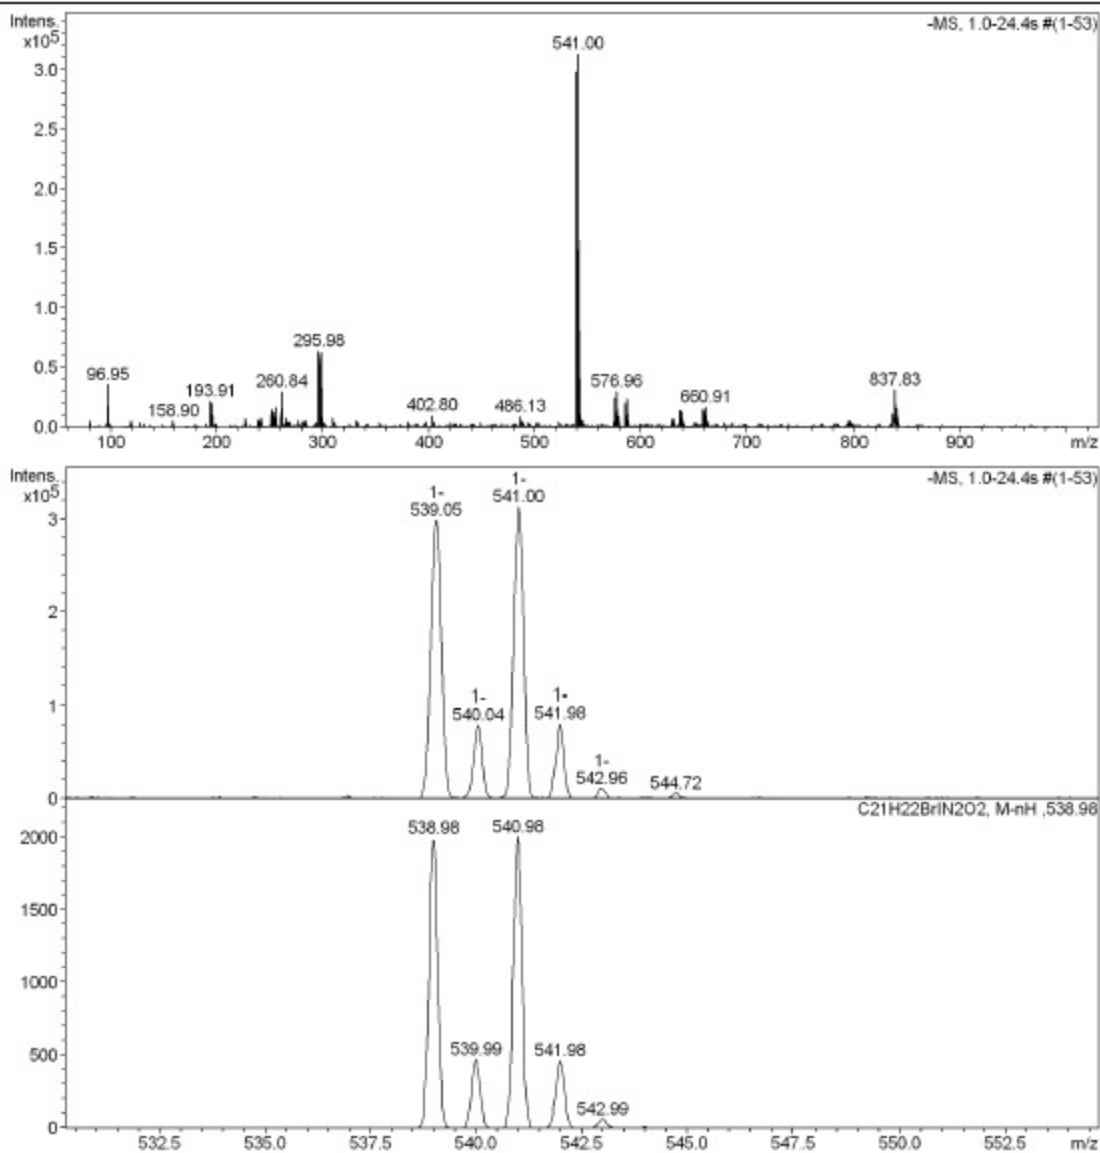

Figure S44. ESI mass spectrum of **II d** in negative ion mode.

## Generic Display Report

### Analysis Info

Analysis Name D:\Data\MS\_MessService\72802\_CHWI432\_amazon.d  
Method MSC-Service\_direct-injection.m  
Sample Name 72802\_CHWI432\_amazon  
Comment Wittmann / AOC  
MeOH / ACN + 1% H2O

Acquisition Date 9/1/2020 8:54:37 AM

Operator MSC  
Instrument amaZon speed ETD

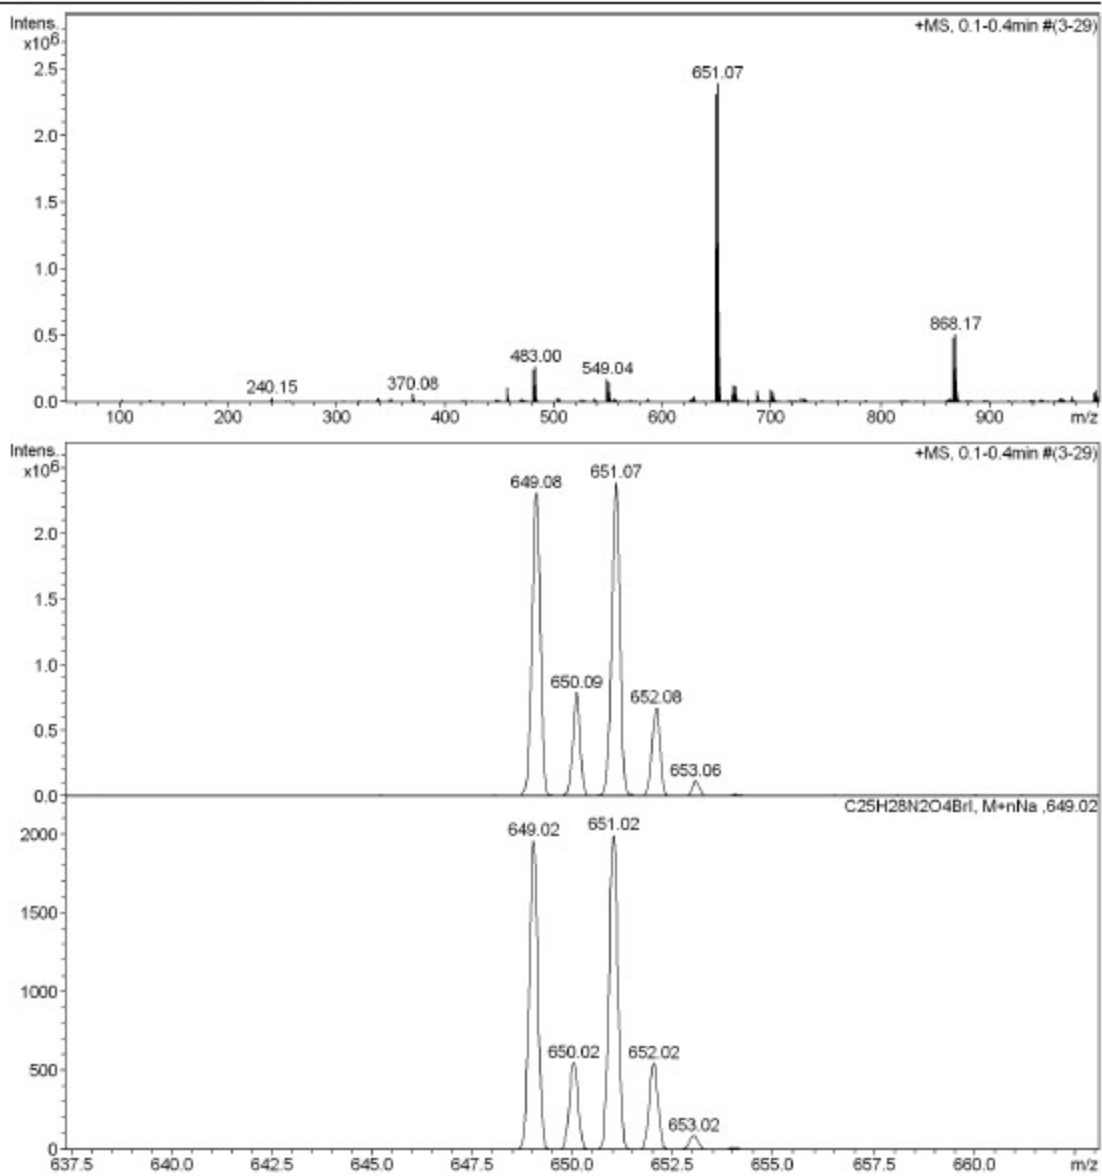

Figure S45. ESI mass spectrum of IIIb in positive ion mode.

## Generic Display Report

### Analysis Info

Analysis Name D:\Data\MS\_MessService\90257\_JAHE16\_amazon.d  
Method MSC-Service\_direct-injection.m  
Sample Name 90257\_JAHE16\_amazon  
Comment Wittmann / Anorg.Chem.  
ACN / MeOH + 1% H2O

Acquisition Date 7/13/2022 3:50:02 PM

Operator MSC  
Instrument amaZon speed ETD

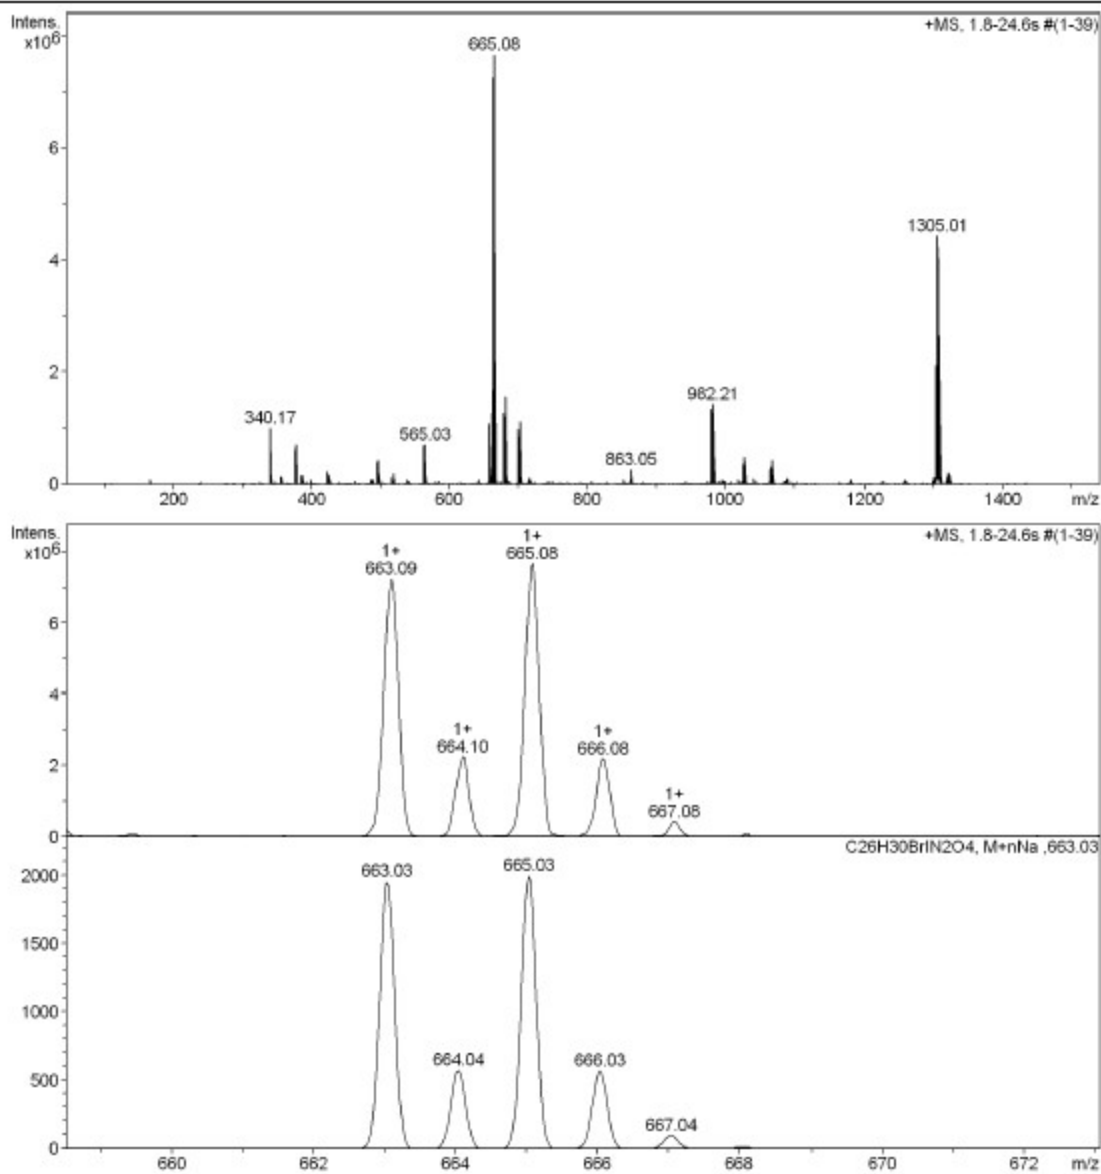

Figure S46. ESI mass spectrum of **III d** in positive ion mode.



## Generic Display Report

### Analysis Info

Analysis Name D:\Data\MS\_MessService\71663\_CHWI387\_amazon.d  
Method MSC-Service\_direct-injection.m  
Sample Name 71663\_CHWI387\_amazon  
Comment Wittmann / Anorg. Chem.  
ACN/MeOH + 1% H<sub>2</sub>O

Acquisition Date 7/15/2020 12:34:09 PM

Operator MSC  
Instrument amaZon speed ETD

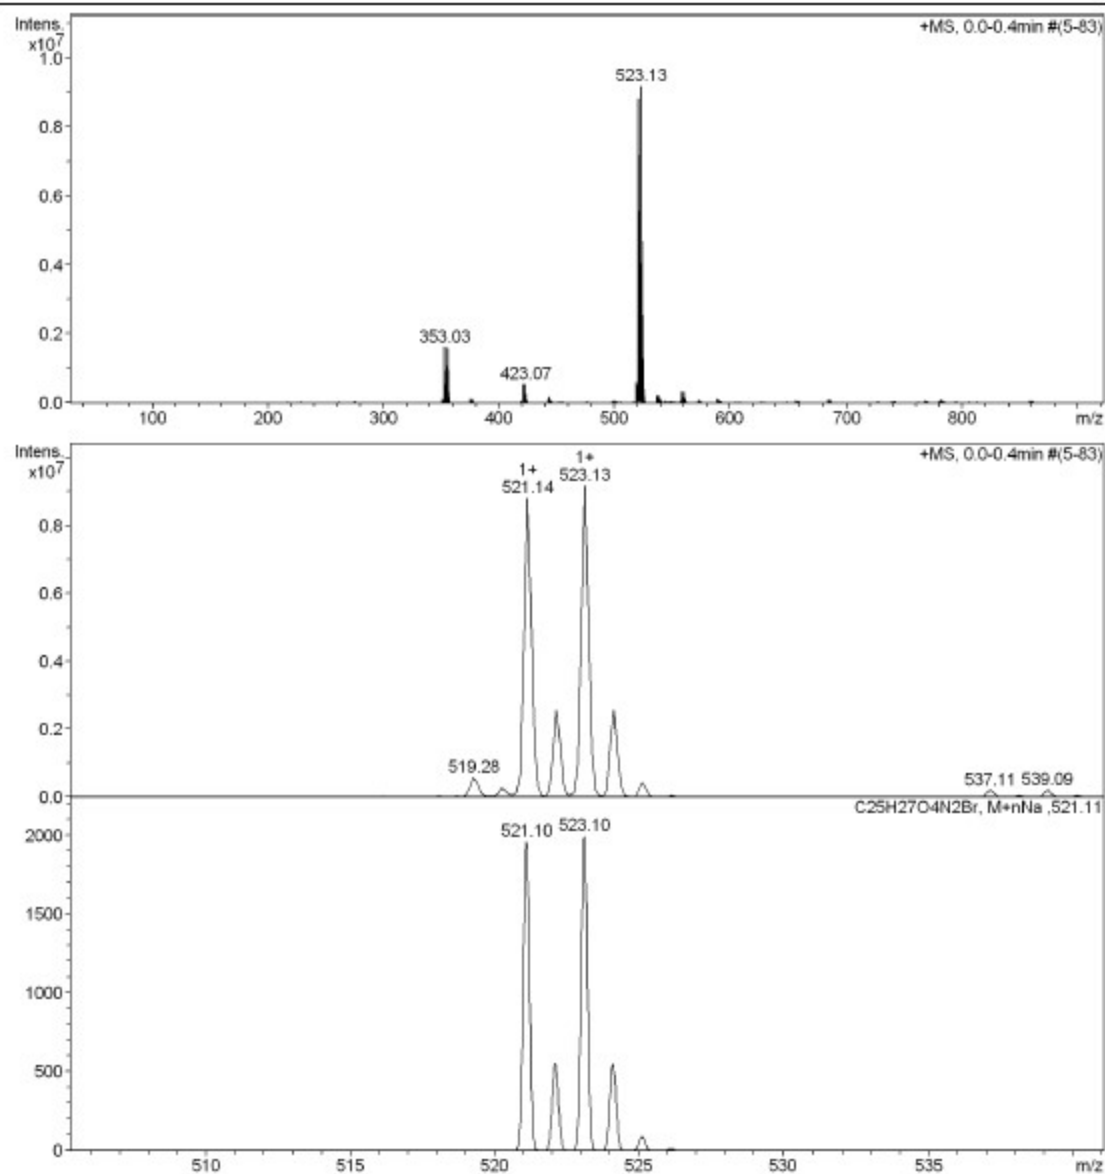

Figure S47. ESI mass spectrum of **IVb** in positive ion mode.

## Generic Display Report

### Analysis Info

Analysis Name D:\Data\MS\_MessService\90411\_CHWI1041\_amazon.d  
Method MSC-Service\_direct-injection\_new.m  
Sample Name 90411\_CHWI1041\_amazon  
Comment Wittmann / Anorg.Chem.  
ACN / MeOH + 1% H2O

Acquisition Date 7/18/2022 3:28:21 PM

Operator MSC  
Instrument amaZon speed ETD

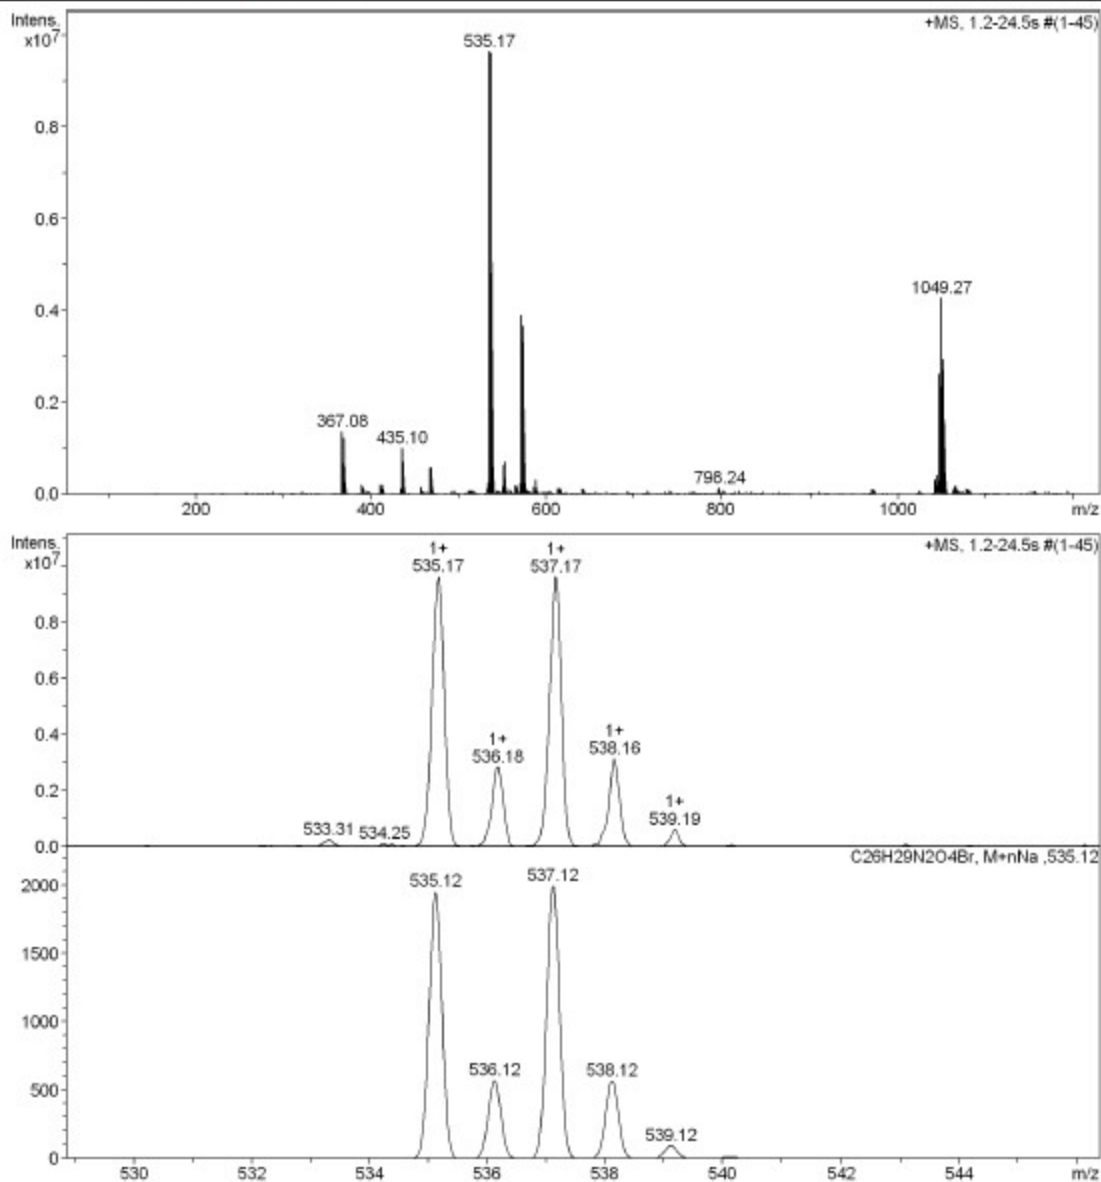

**Figure S48.** ESI mass spectrum of **IVd** in positive ion mode.

# Generic Display Report

## Analysis Info

Analysis Name D:\Data\MS\_MessService\74594\_CHWI514\_amazon.d  
Method lo-mc\_1100\_normal\_flow\_06okt2020\_5518.m  
Sample Name 74594\_CHWI514\_amazon  
Comment Wittmann / AOC  
ACN / MeOH + 1% H2O

Acquisition Date 11/6/2020 4:31:13 PM

Operator MSC  
Instrument amaZon speed ETD

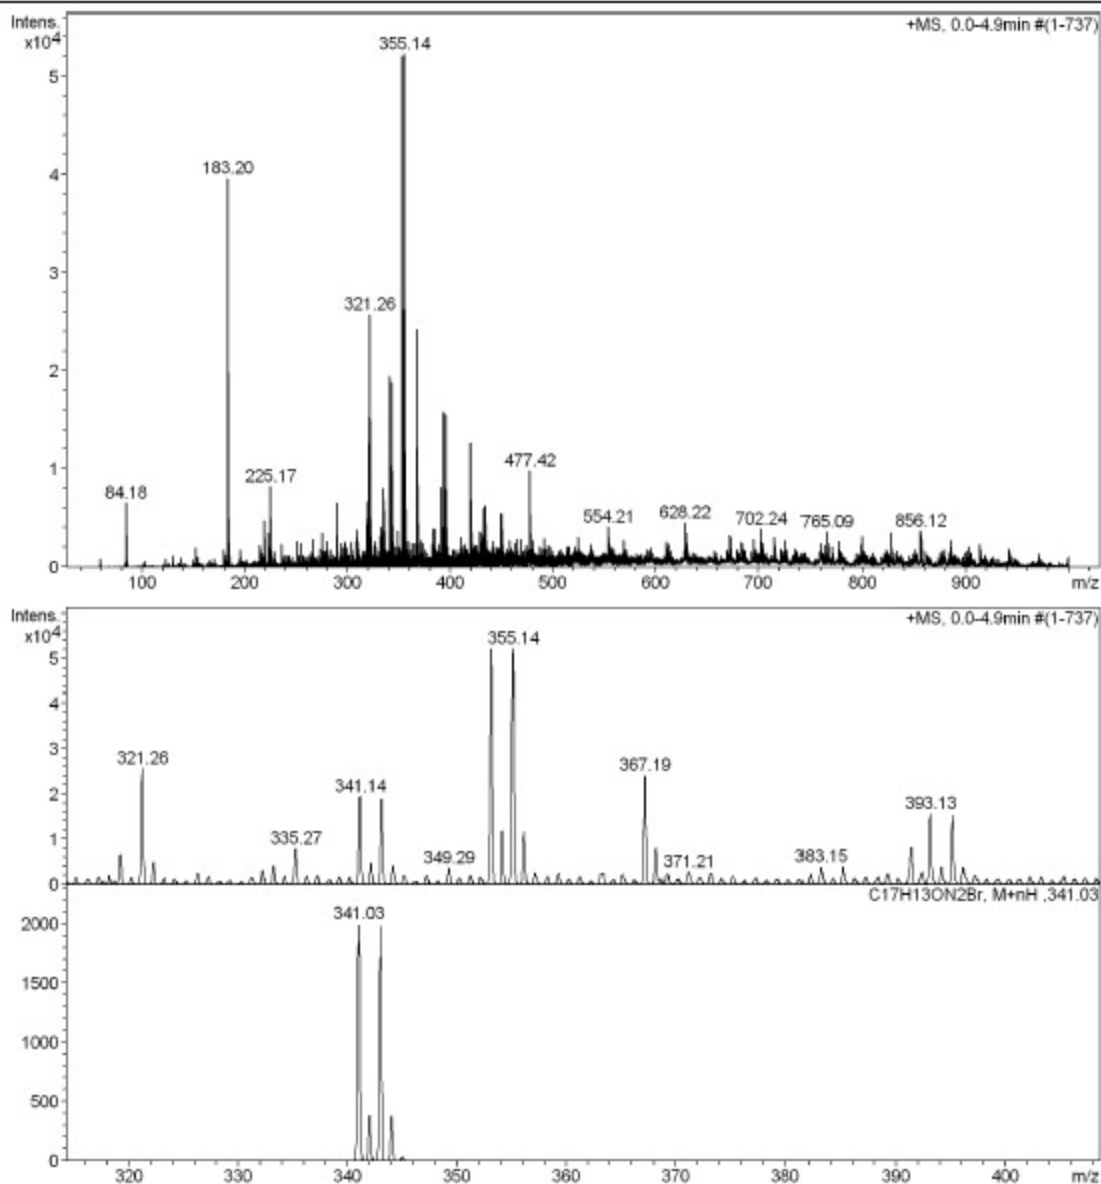

Figure S49. ESI mass spectrum of Vb in positive ion mode.

## Generic Display Report

### Analysis Info

Analysis Name D:\Data\MS\_MessService\71028\_CHWI362\_amazon.d  
Method MSC-Service\_direct-injection.m  
Sample Name 71028\_CHWI362\_amazon  
Comment Wittmann / Anorg.Chem.  
ACN/MeOH + 1% H2O

Acquisition Date 6/19/2020 12:30:23 PM

Operator MSC  
Instrument amaZon speed ETD

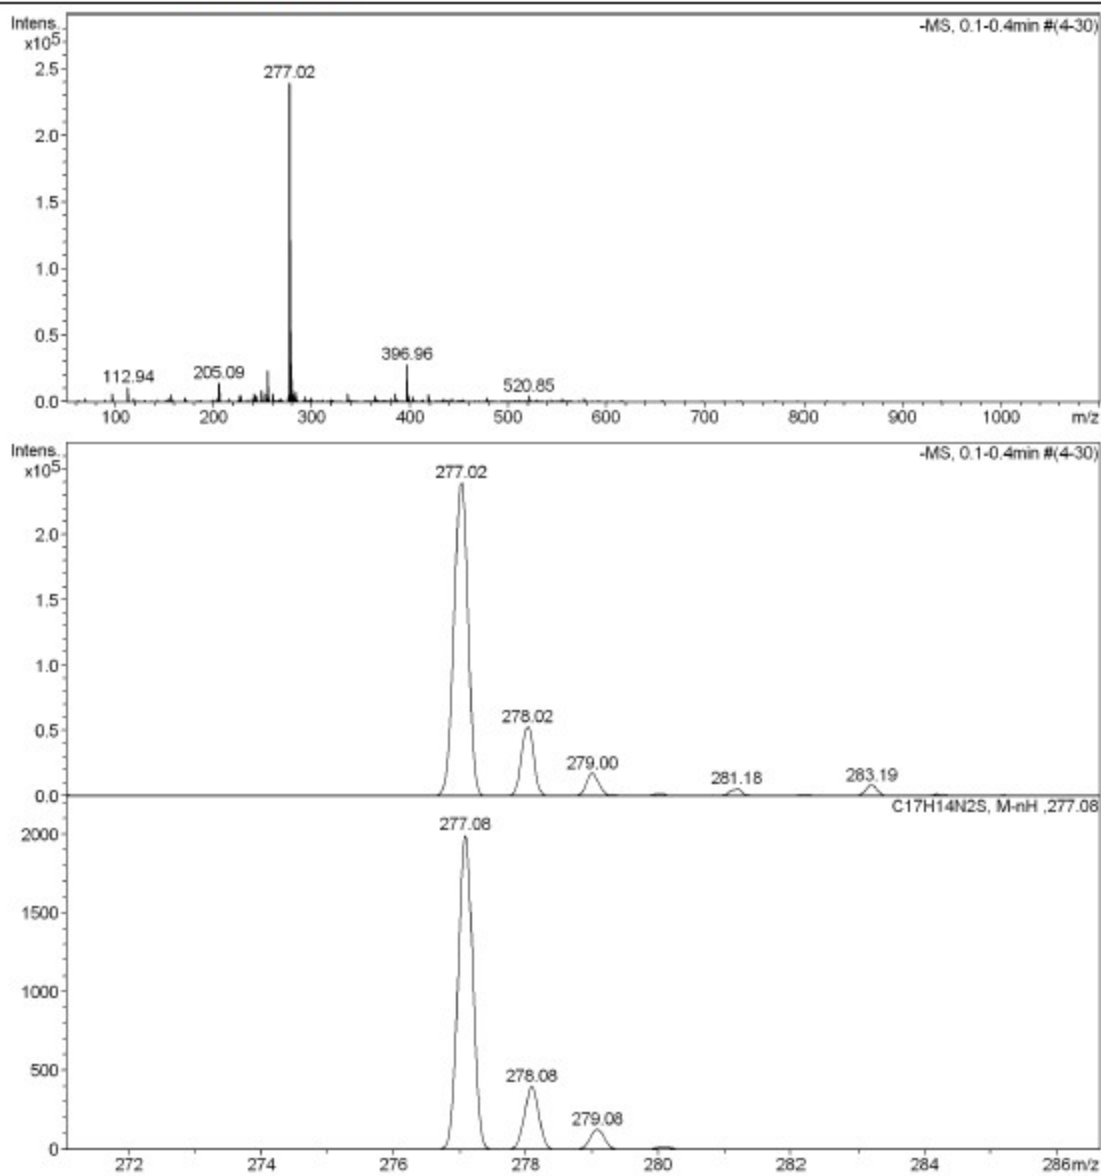

Figure S50. ESI mass spectrum of VIa in negative ion mode.

## Generic Display Report

### Analysis Info

Analysis Name D:\Data\MS\_MessService\73510\_CHWI464\_10\_12\_amazon.d  
Method MSC-Service\_direct-injection.m  
Sample Name 73510\_CHWI464\_10\_12\_amazon  
Comment Wittmann / AOC  
ACN/MeOH + 1%

Acquisition Date 9/30/2020 7:05:25 AM

Operator MSC  
Instrument amaZon speed ETD

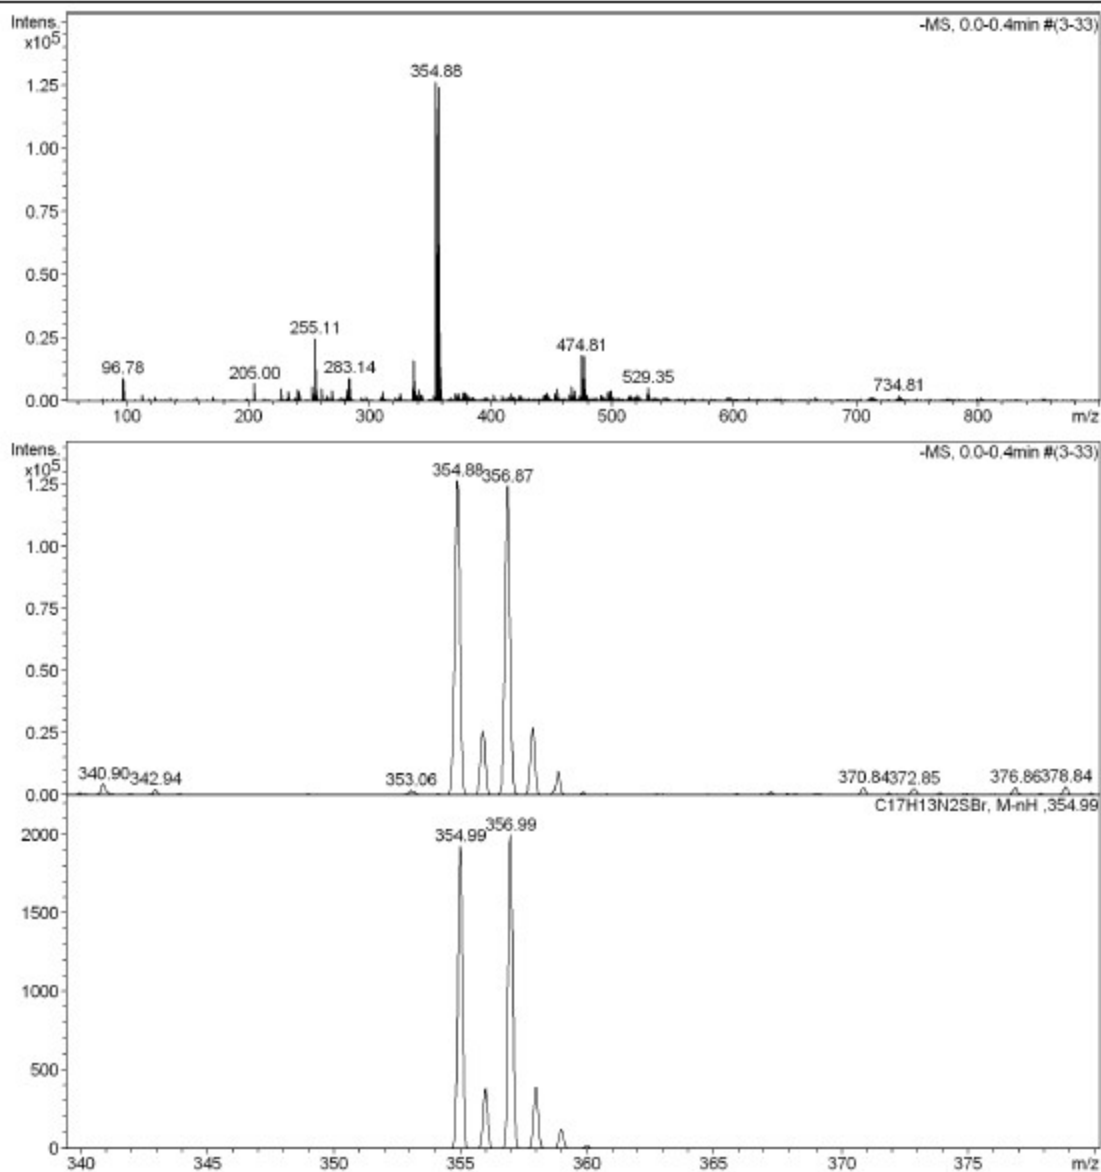

Figure S51. ESI mass spectrum of VIb in negative ion mode.

## Generic Display Report

### Analysis Info

Analysis Name D:\Data\MS\_MessService\92724\_RIUR 04.2\_amazon.d  
Method MSC-Service\_direct-injection.m  
Sample Name 92724\_RIUR 04.2\_amazon  
Comment Wittmann / AOC  
ACN / MeOH +1% H2O

Acquisition Date 11/3/2022 10:39:31 AM

Operator MSC  
Instrument amaZon speed ETD

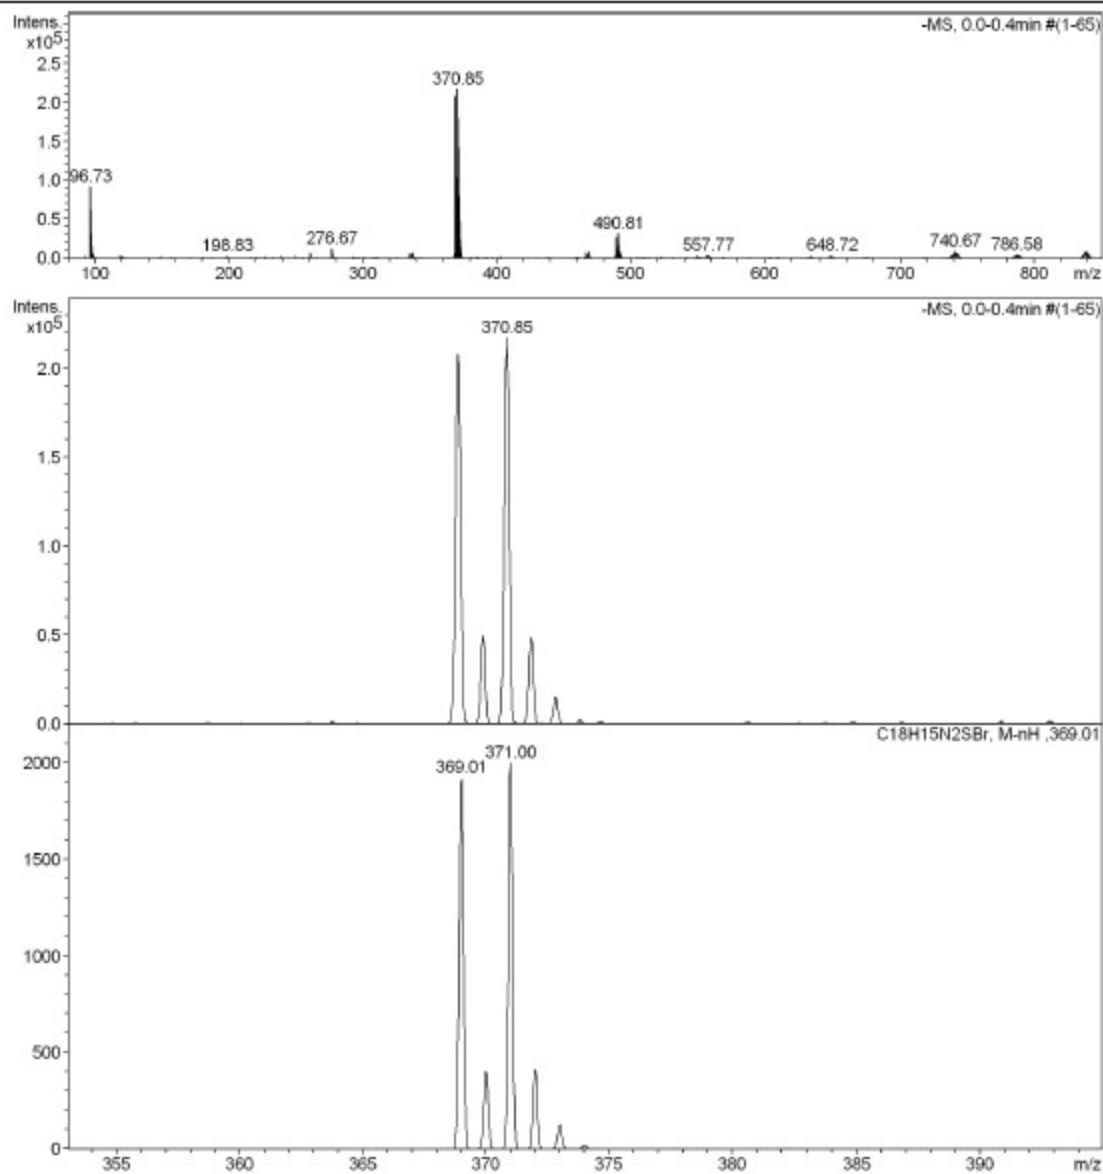

Figure S52. ESI mass spectrum of VIId in negative ion mode.

## Generic Display Report

### Analysis Info

Analysis Name D:\Data\MS\_MessService\78114\_CHWI655\_amazon.d  
Method MSC-Service\_direct-injection.m  
Sample Name 78114\_CHWI655\_amazon  
Comment Wittmann / Anorg.Chem.  
ACN / MeOH + 1% H2O

Acquisition Date 3/11/2021 12:53:26 PM

Operator MSC  
Instrument amaZon speed ETD

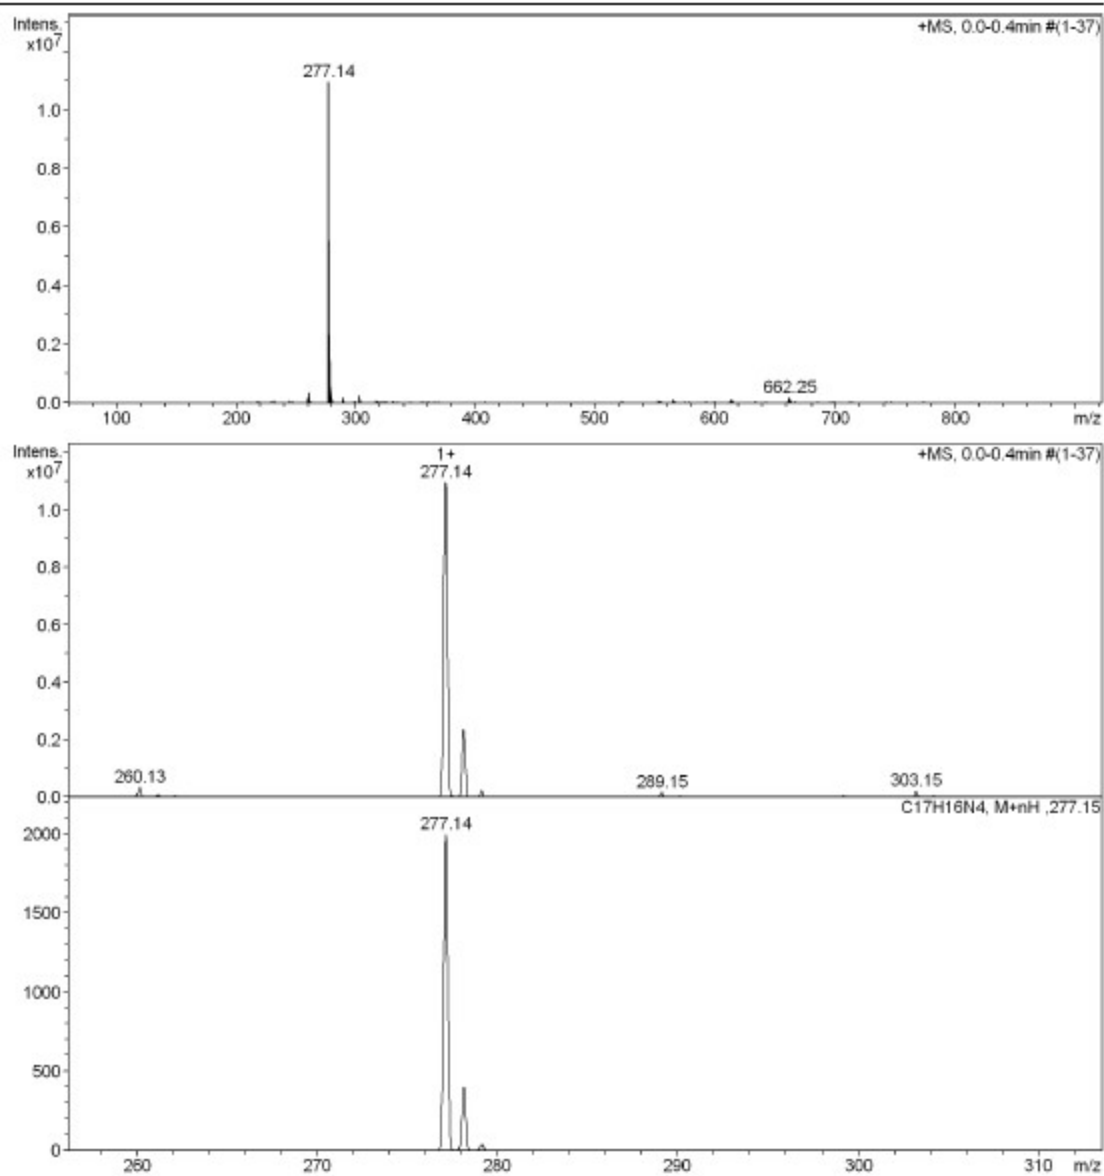

**Figure S53.** ESI mass spectrum of VIIa in positive ion mode.

## Generic Display Report

### Analysis Info

Analysis Name D:\Data\MS\_MessService\78817\_CHWI681\_amazon.d  
Method MSC-Service\_direct-injection.m  
Sample Name 78817\_CHWI681\_amazon  
Comment Wittmann / Anorg. Chem.  
ACN / MeOH + 1% H<sub>2</sub>O

Acquisition Date 4/1/2021 2:33:19 PM

Operator MSC  
Instrument amaZon speed ETD

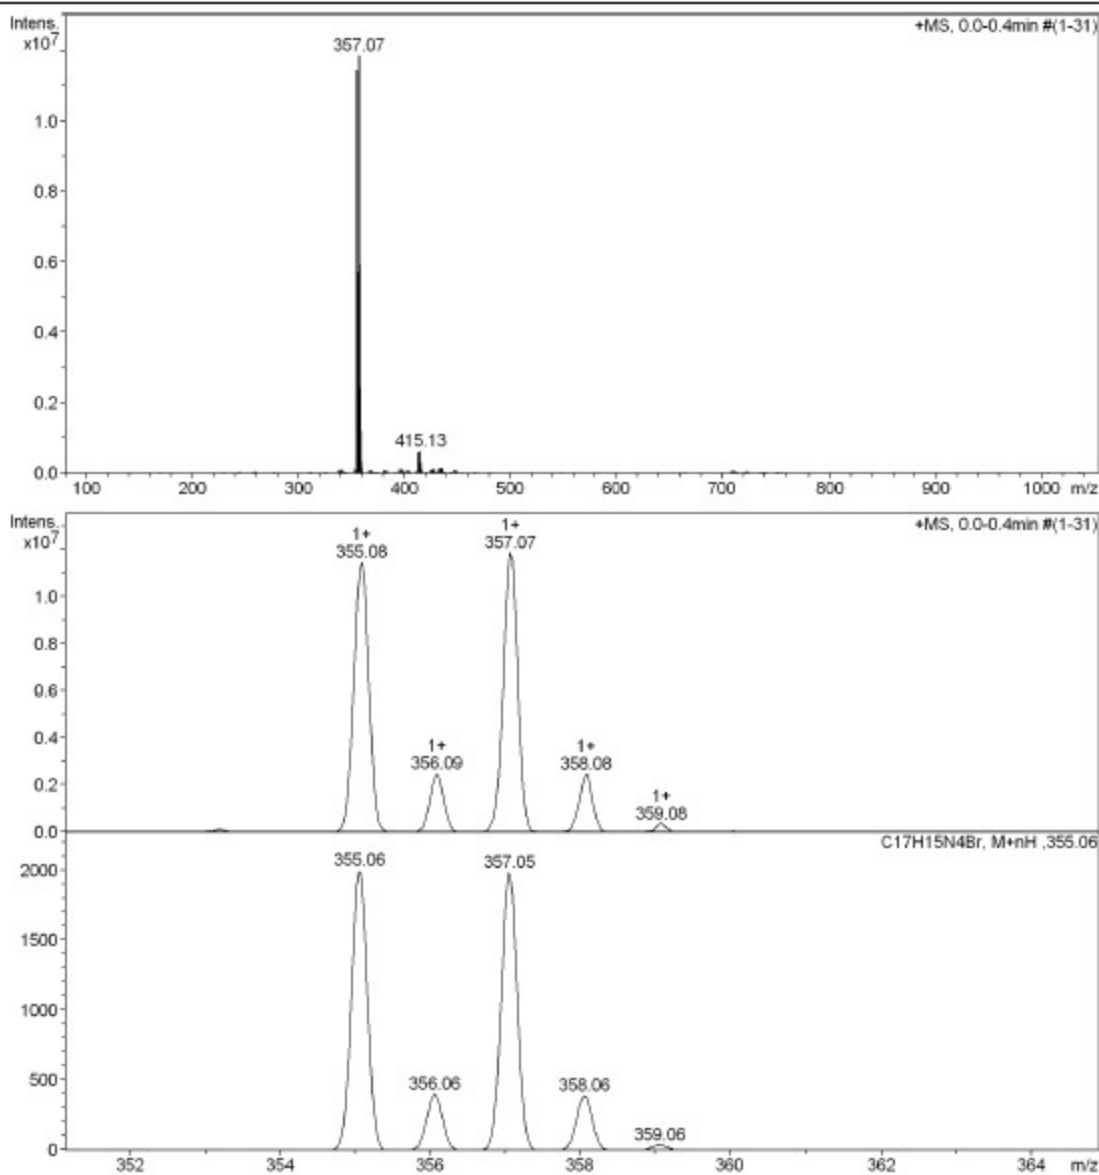

Figure S54. ESI mass spectrum of VIIb in positive ion mode.



## Generic Display Report

### Analysis Info

Analysis Name D:\Data\MS\_MessService\911107\_CHWI1057\_amazon.d  
Method MSC-Service\_direct-injection.m  
Sample Name 911107\_CHWI1057\_amazon  
Comment Wittmann / Anorg.Chem.  
ACN / MeOH + 1% H2O

Acquisition Date 8/18/2022 10:55:23 AM

Operator MSC  
Instrument amaZon speed ETD

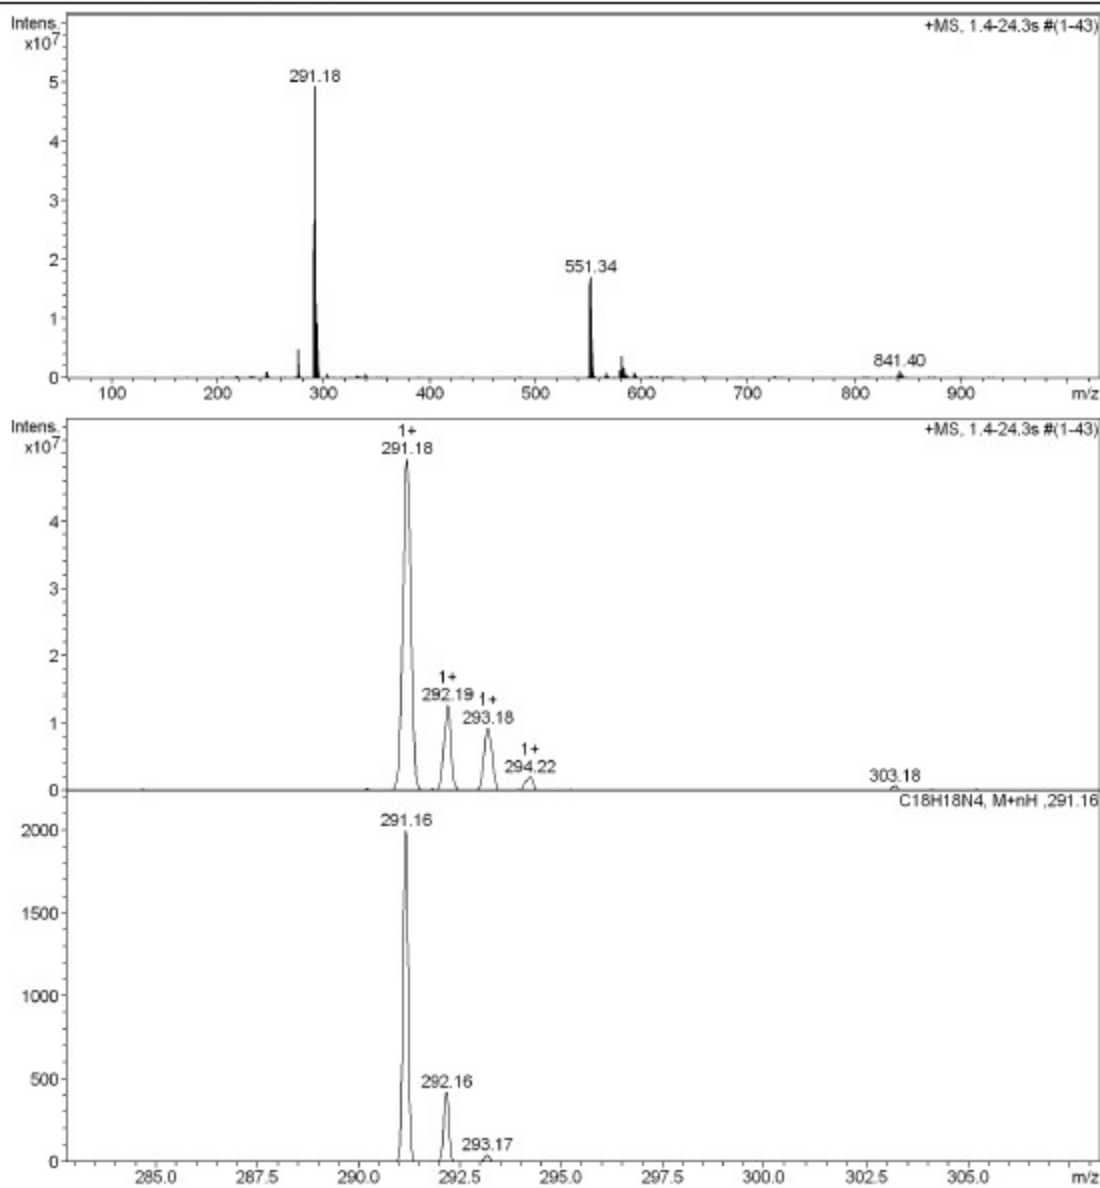

Figure S55. ESI mass spectrum of VIIc in positive ion mode.

## Generic Display Report

### Analysis Info

Analysis Name D:\Data\MS\_MessService\92766\_RIUR 06\_amazon.d  
Method MSC-Service\_direct-injection.m  
Sample Name 92766\_RIUR 06\_amazon  
Comment Wittmann / AOC  
ACN / MeOH +1% H2O

Acquisition Date 11/4/2022 10:15:10 AM

Operator MSC  
Instrument amaZon speed ETD

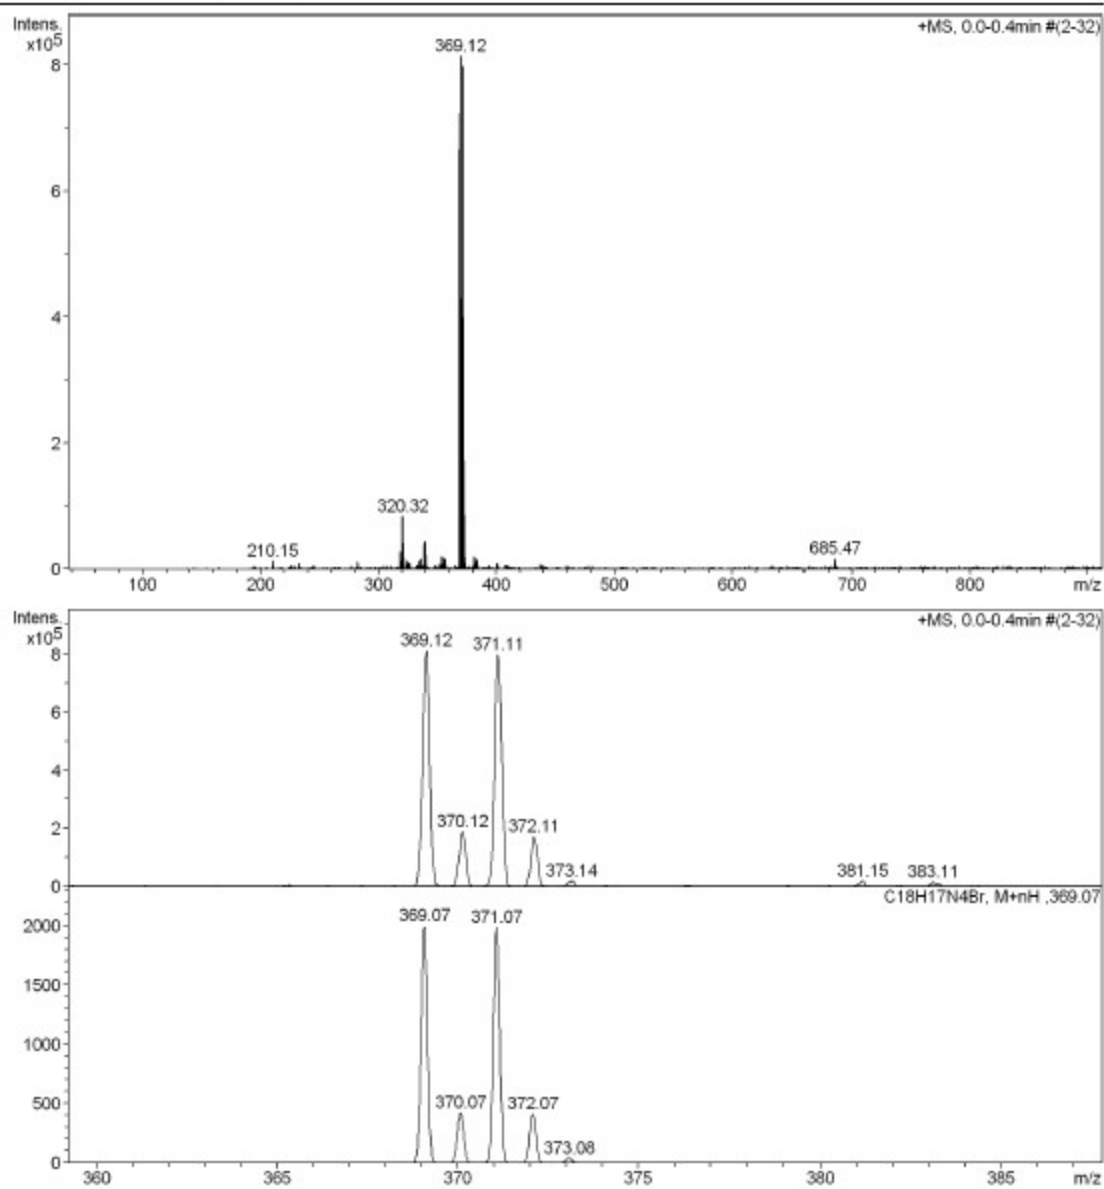

Figure S56. ESI mass spectrum of VIId in positive ion mode.

# Generic Display Report

## Analysis Info

Acquisition Date 06/12/2021 22:09:18  
Analysis Name W:\MS\_MessService\85518000001-85526\_lc-ms\_Wittmann\85521\_CHWI793\_HPLC\_12351.d  
Method lc-ms1\_r50-1900\_5to90in15min\_300ulmin\_30min\_pos\_wittmann.m Operator msc  
Sample Name 85521\_CHWI793\_HPLC Instrument maXis  
Comment

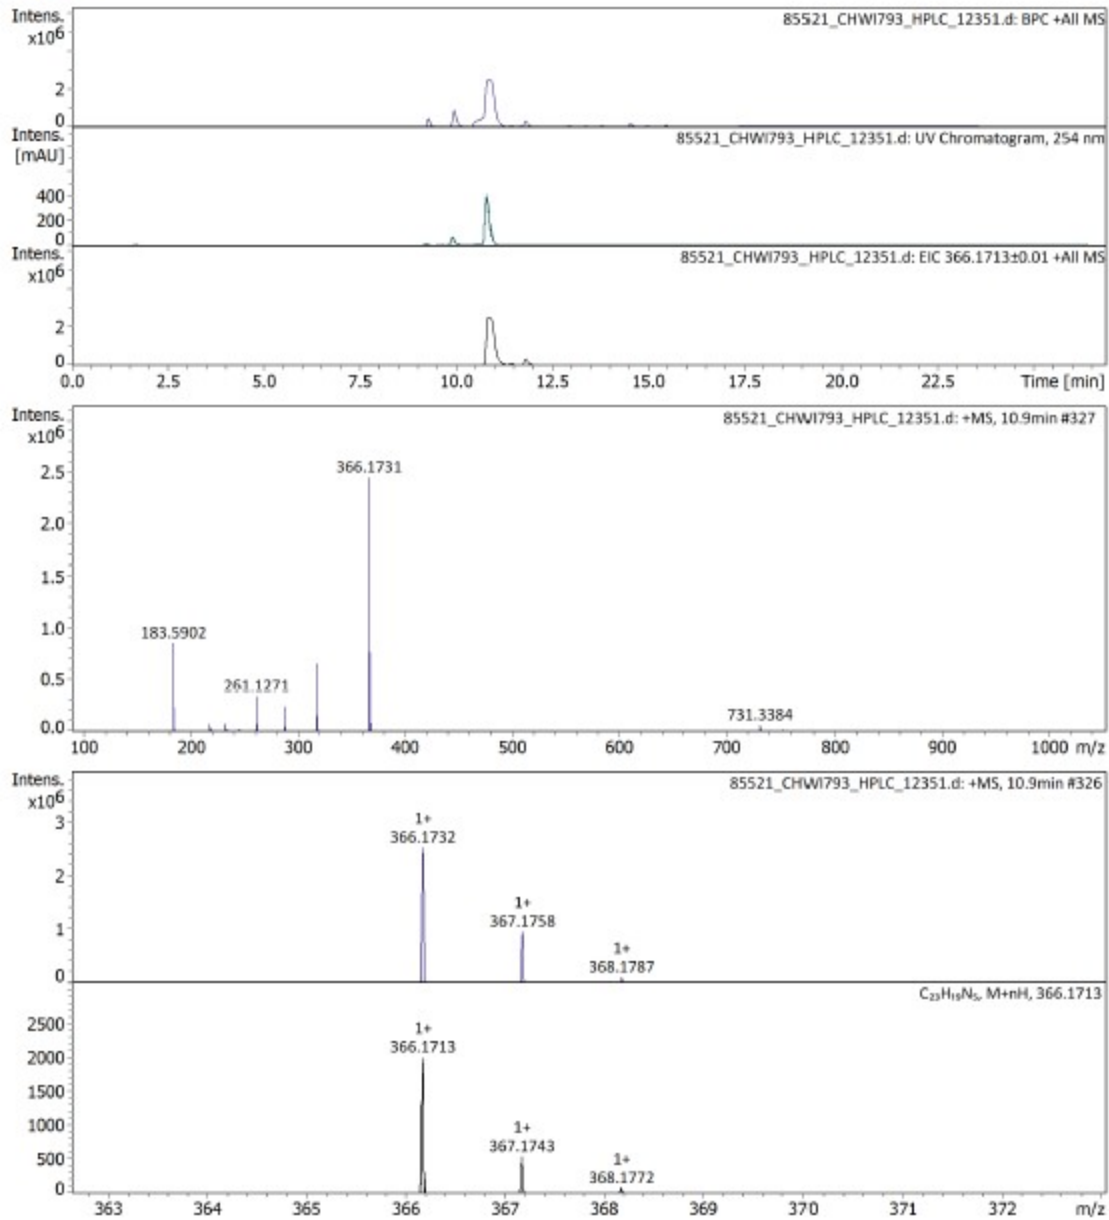

Figure S57. HPLC-HR-MS spectrum of HL<sup>1</sup> in positive ion mode.

## Generic Display Report

### Analysis Info

Acquisition Date 06/12/2021 19:01:00  
Analysis Name W:\MS\_MessService\8551800001-85526\_lc-ms\_Wittmann\85518\_CHWI667\_HPLC\_12345.d  
Method lc-ms1\_r50-1900\_5to90in15min\_300ulmin\_30min\_pos\_wittmann.m Operator msc  
Sample Name 85518\_CHWI667\_HPLC Instrument maXis  
Comment

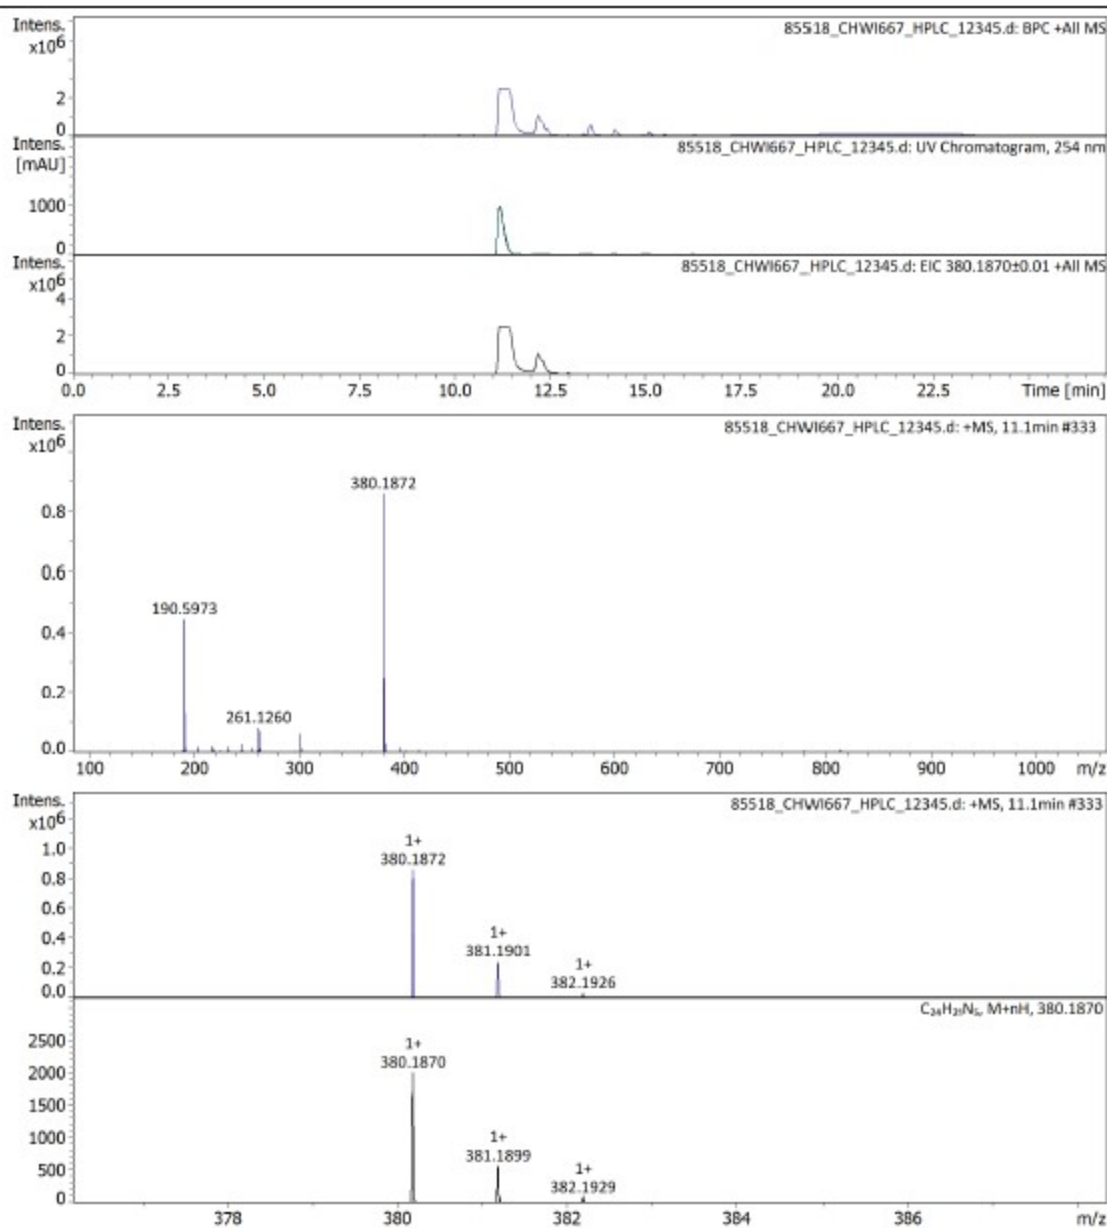

Figure S58. HPLC-HR-MS spectrum of  $HL^2$  in positive ion mode.

## Generic Display Report

### Analysis Info

Acquisition Date 06/12/2021 20:03:42  
Analysis Name W:\MS\_MessService\8551800001-85526\_lc-ms\_Wittmann\85519\_CHWI684\_HPLC\_12347.d  
Method lc-ms1\_r50-1900\_5to90in15min\_300ulmin\_30min\_pos\_wittmann.m Operator msc  
Sample Name 85519\_CHWI684\_HPLC Instrument maXis  
Comment

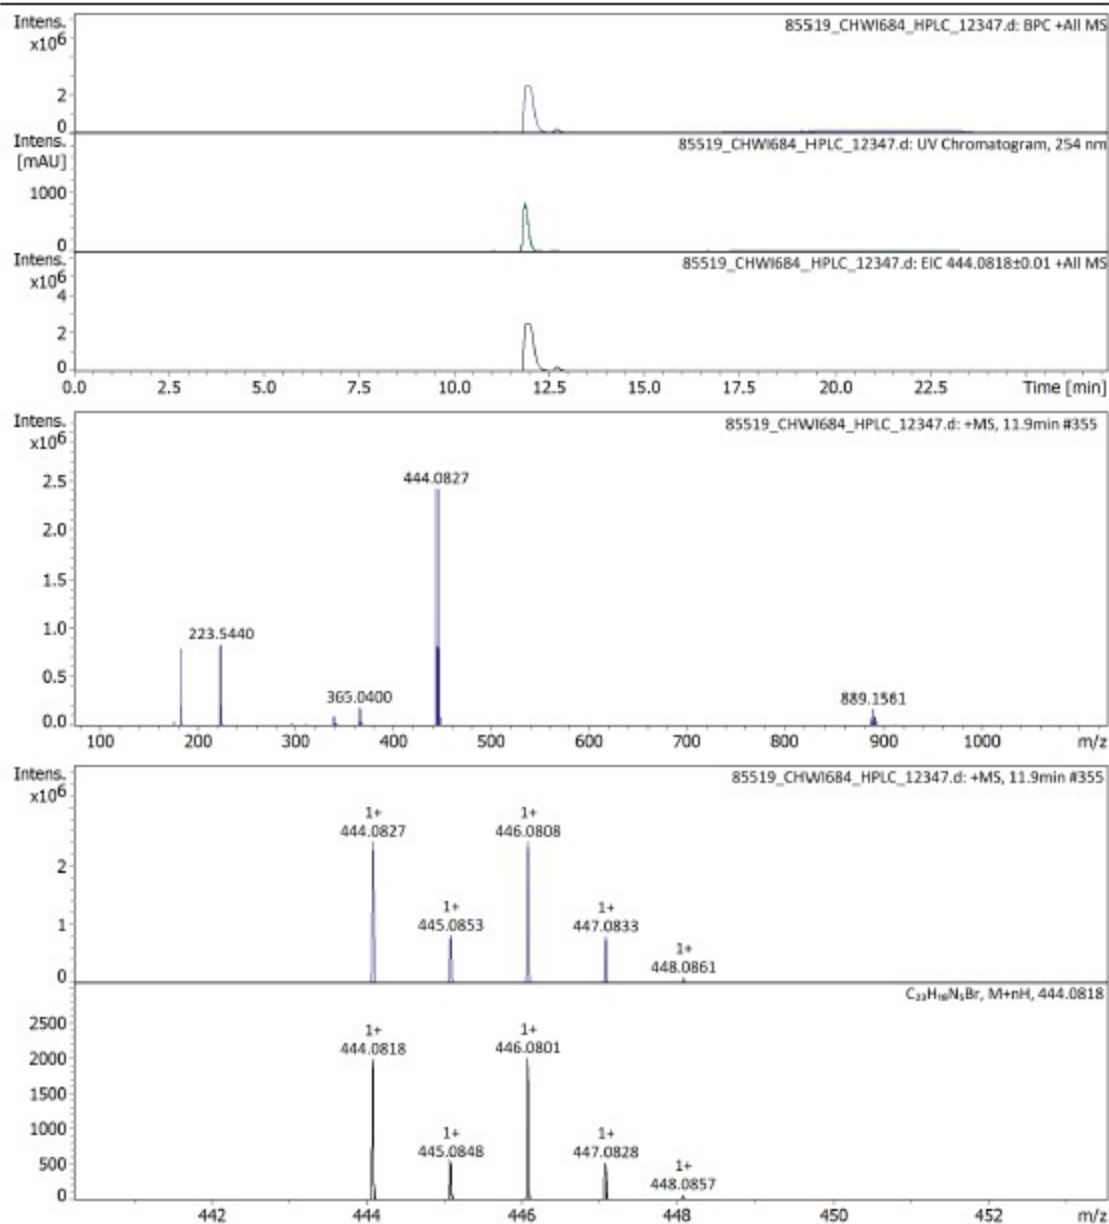

Figure S59. HPLC-HR-MS spectrum of  $HL^3$  in positive ion mode.

# Generic Display Report

**Analysis Info** Acquisition Date 06/12/2021 21:06:33  
Analysis Name W:\MS\_MessService\8551800001-85526\_lc-ms\_Wittmann\85520\_CHWI685\_HPLC\_12349.d  
Method lc-ms1\_r50-1900\_5to90in15min\_300ulmin\_30min\_pos\_wittmann.m Operator msc  
Sample Name 85520\_CHWI685\_HPLC Instrument maXis  
Comment

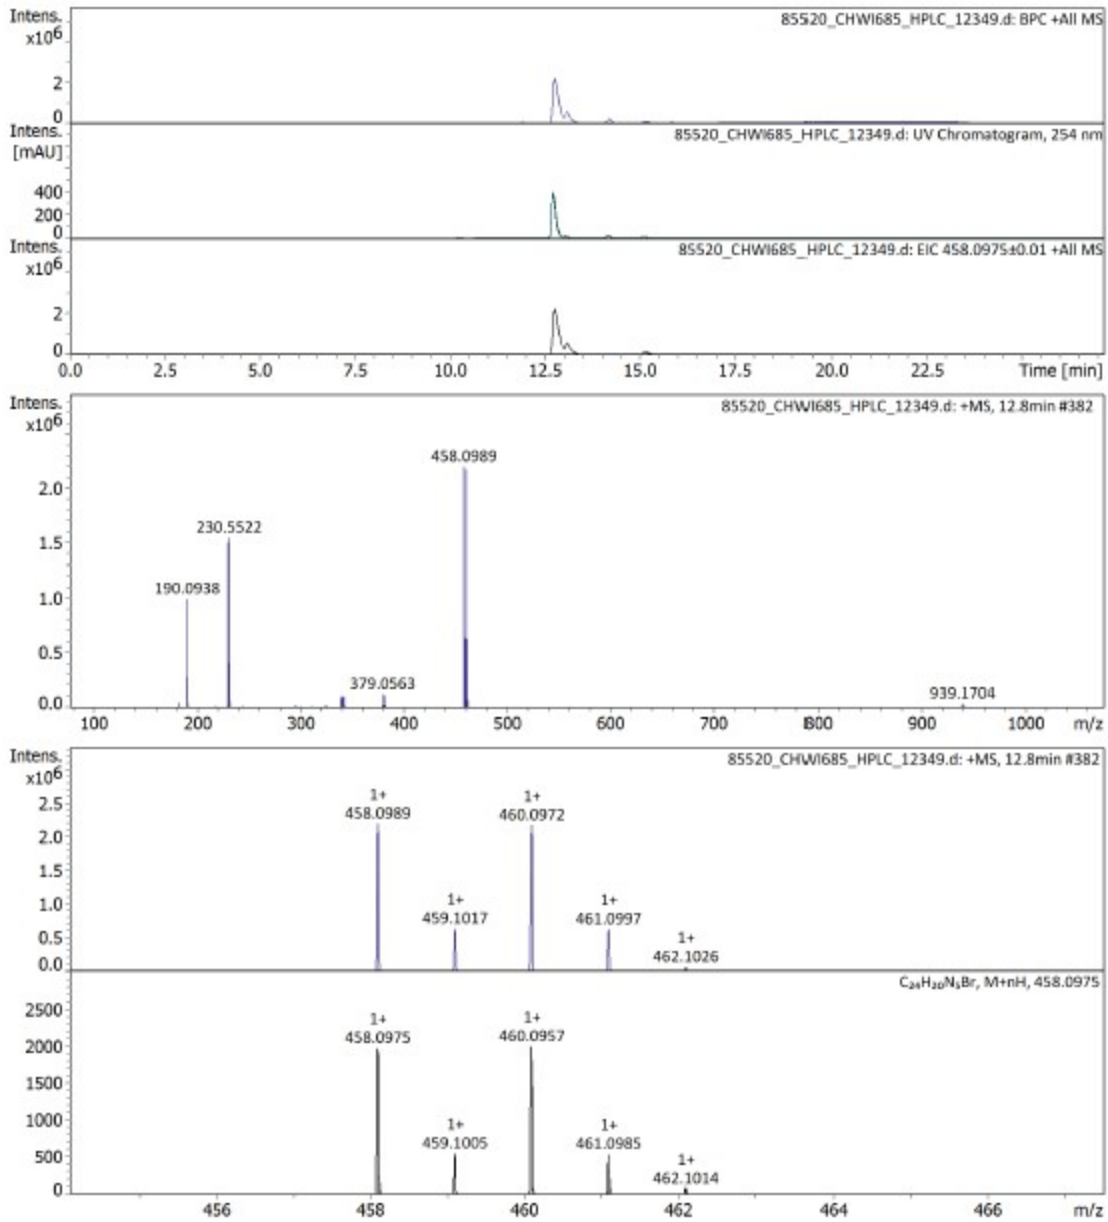

Figure S60. HPLC-HR-MS spectrum of  $HL^4$  in positive ion mode.

## Generic Display Report

### Analysis Info

Analysis Name D:\Data\MS\_MessService\91271\_CHWI1058\_amazon.d  
Method MSC-Service\_direct-injection.m  
Sample Name 91271\_CHWI1058\_amazon  
Comment Wittmann / Anorg. Chem.  
ACN / MeOH + 1% H<sub>2</sub>O

Acquisition Date 8/25/2022 10:26:37 AM

Operator MSC  
Instrument amaZon speed ETD

Note: 220.8 neg is from previous sample; hard to flush out

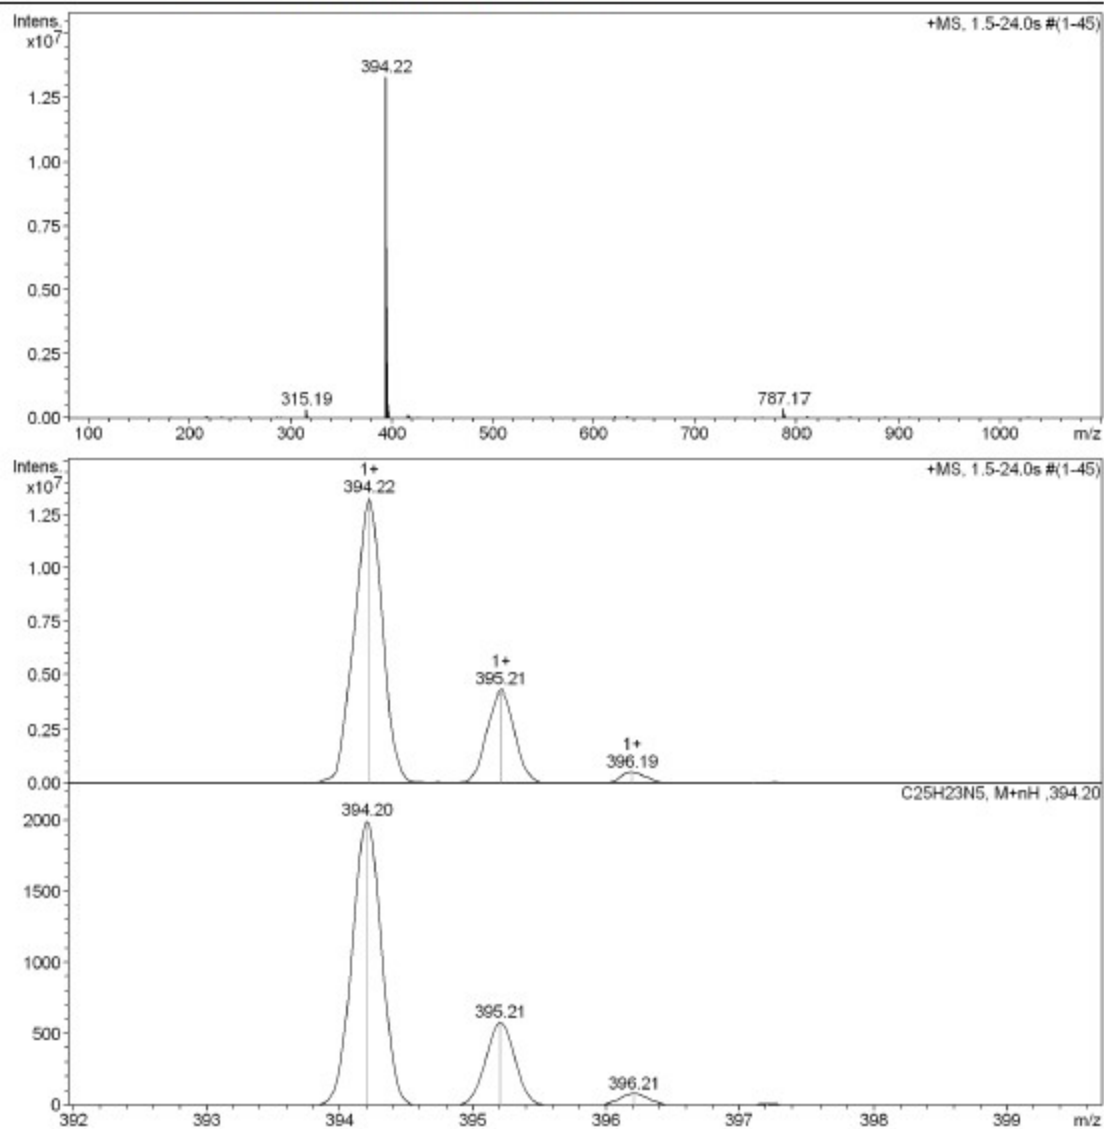

Figure S61. ESI mass spectrum of HL<sup>5</sup> in positive ion mode.

## Generic Display Report

### Analysis Info

Analysis Name D:\Data\MS\_MessService\92795\_RIUR 08\_amazon.d  
Method MSC-Service\_direct-injection.m  
Sample Name 92795\_RIUR 08\_amazon  
Comment Wittmann / AOC  
ACN / MeOH +1% H2O

Acquisition Date 11/7/2022 11:33:09 AM

Operator MSC  
Instrument amaZon speed ETD

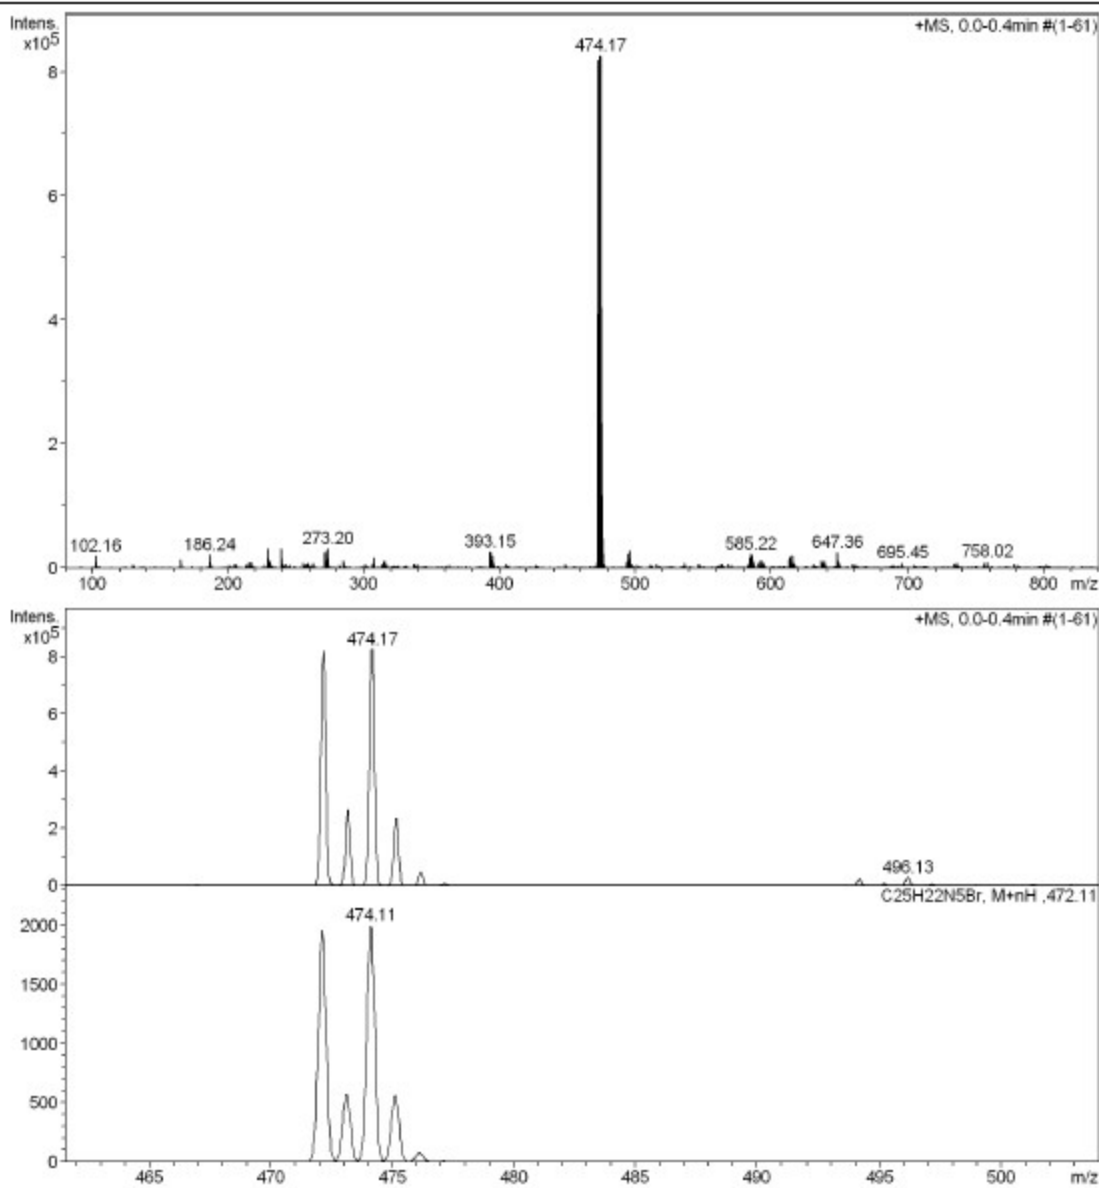

Figure S62. ESI mass spectrum of **HL<sup>6</sup>** in positive ion mode.



## Generic Display Report

### Analysis Info

Acquisition Date 09/12/2021 15:21:11  
Analysis Name W:\MS\_MessService\85518000001-85526\_lo-ms\_Wittmann\85526\_CHW1833\_HPLC\_MeOH-ACN\_12391.d  
Method lc-ms1\_r50-1900\_isocrat50meoh-acn\_300ulmin\_10min\_pos\_wittmann.m Operator msc  
Sample Name 85526\_CHW1833\_HPLC Instrument maXis  
Comment

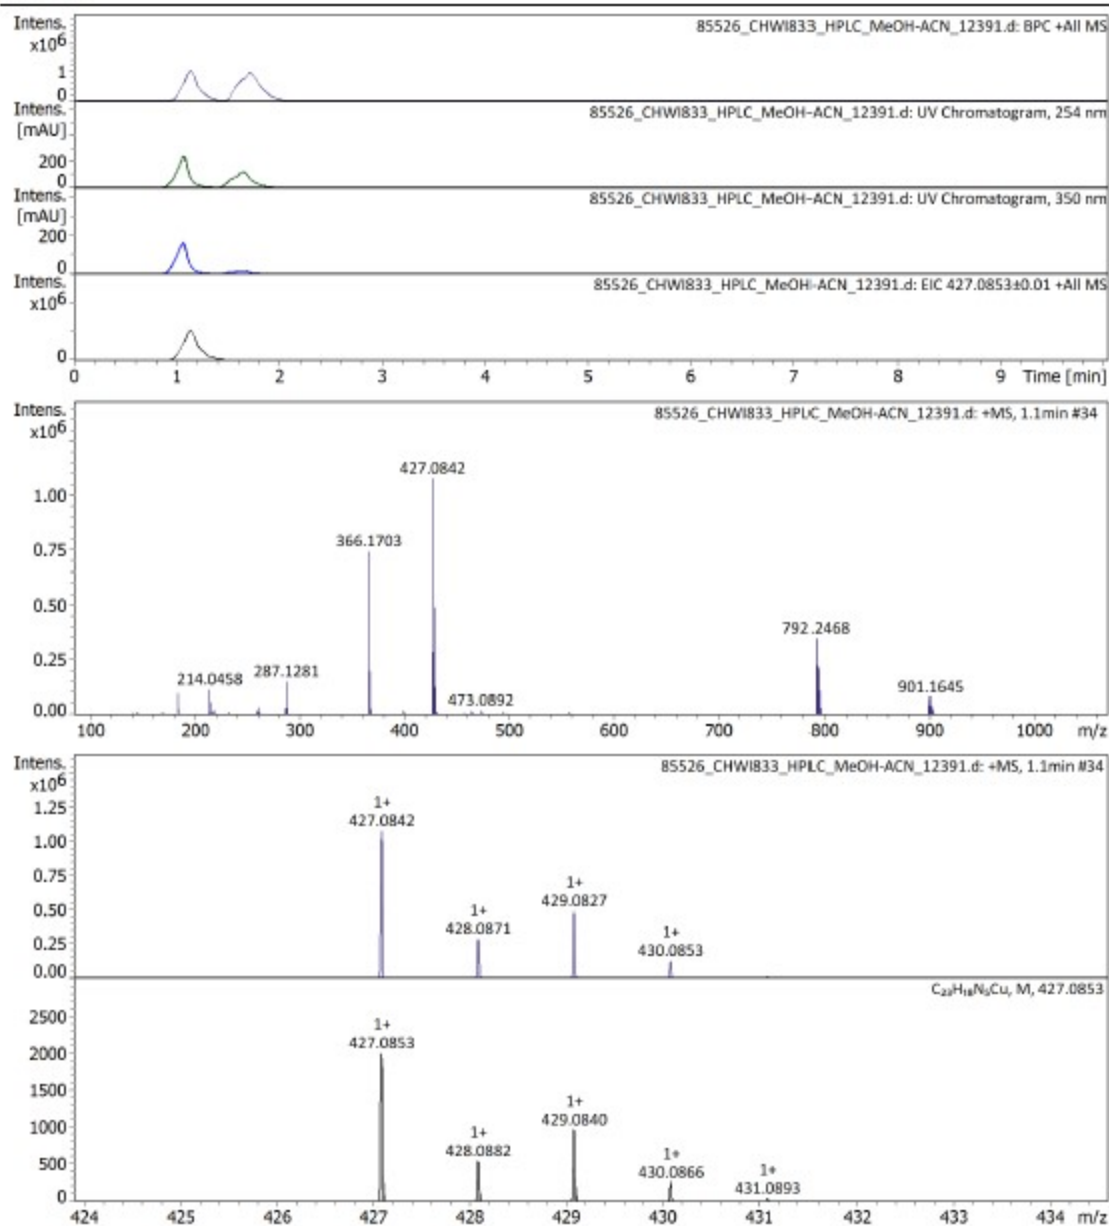

Figure S63. ESI mass spectrum of **1** in positive ion mode.

## Generic Display Report

### Analysis Info

Analysis Name W:\MS\_MessService\85518000001-85526\_lc-ms\_Wittmann\85522\_CHWI665\_HPLC\_MeOH-ACN\_12378.d  
Method lc-ms1\_r50-1900\_isocrat50meoh-acn\_300ulmin\_10min\_pos\_wittmann.m Operator msc  
Sample Name 85522\_CHWI665\_HPLC Instrument maXis  
Comment

Acquisition Date 09/12/2021 11:00:24

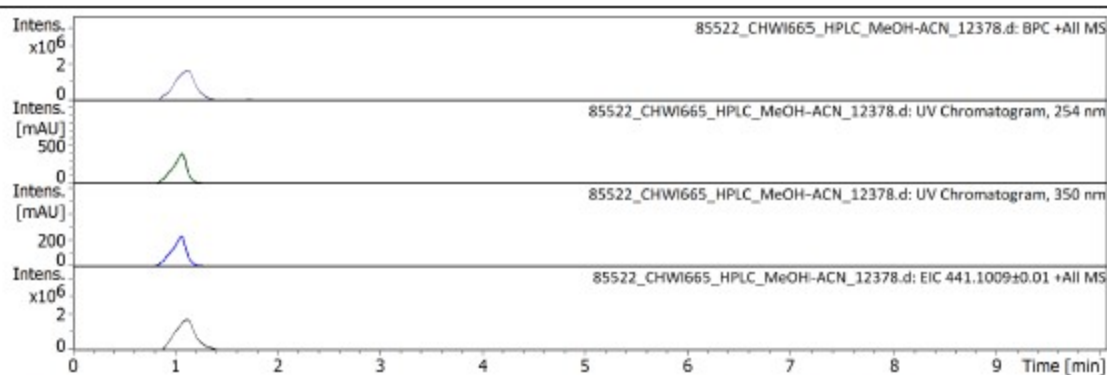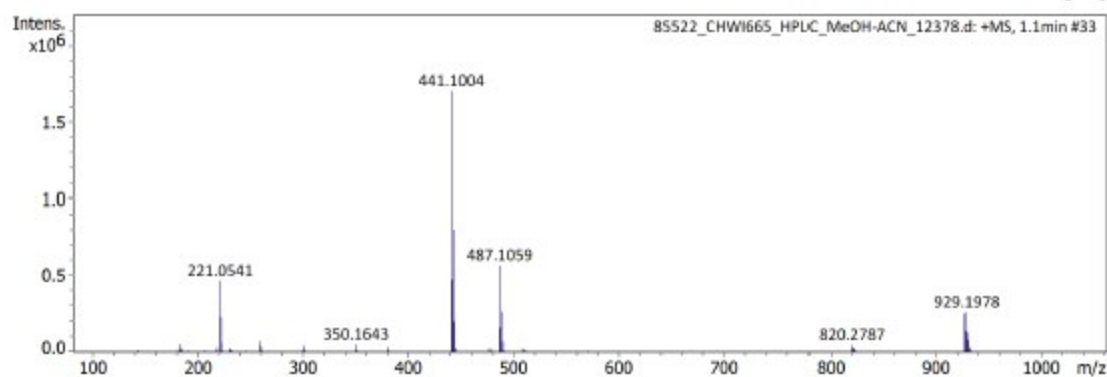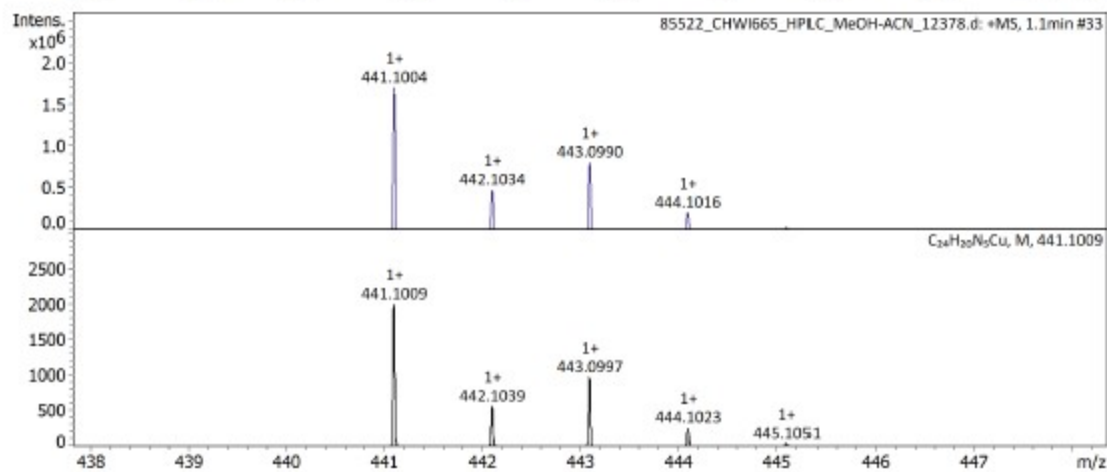

Figure S64. ESI mass spectrum of **2** in positive ion mode.

## Generic Display Report

**Analysis Info** Acquisition Date 09/12/2021 12:22:35  
Analysis Name W:\MS\_MessService\8551800001-85526\_lo-ms\_Wittmann\85524\_CHWI687\_HPLC\_MeOH-ACN\_12383.d  
Method lo-ms1\_r50-1900\_isocrat50meoh-acn\_300ulmin\_10min\_pos\_wittmann.m Operator msc  
Sample Name 85524\_CHWI687\_HPLC Instrument maXis  
Comment

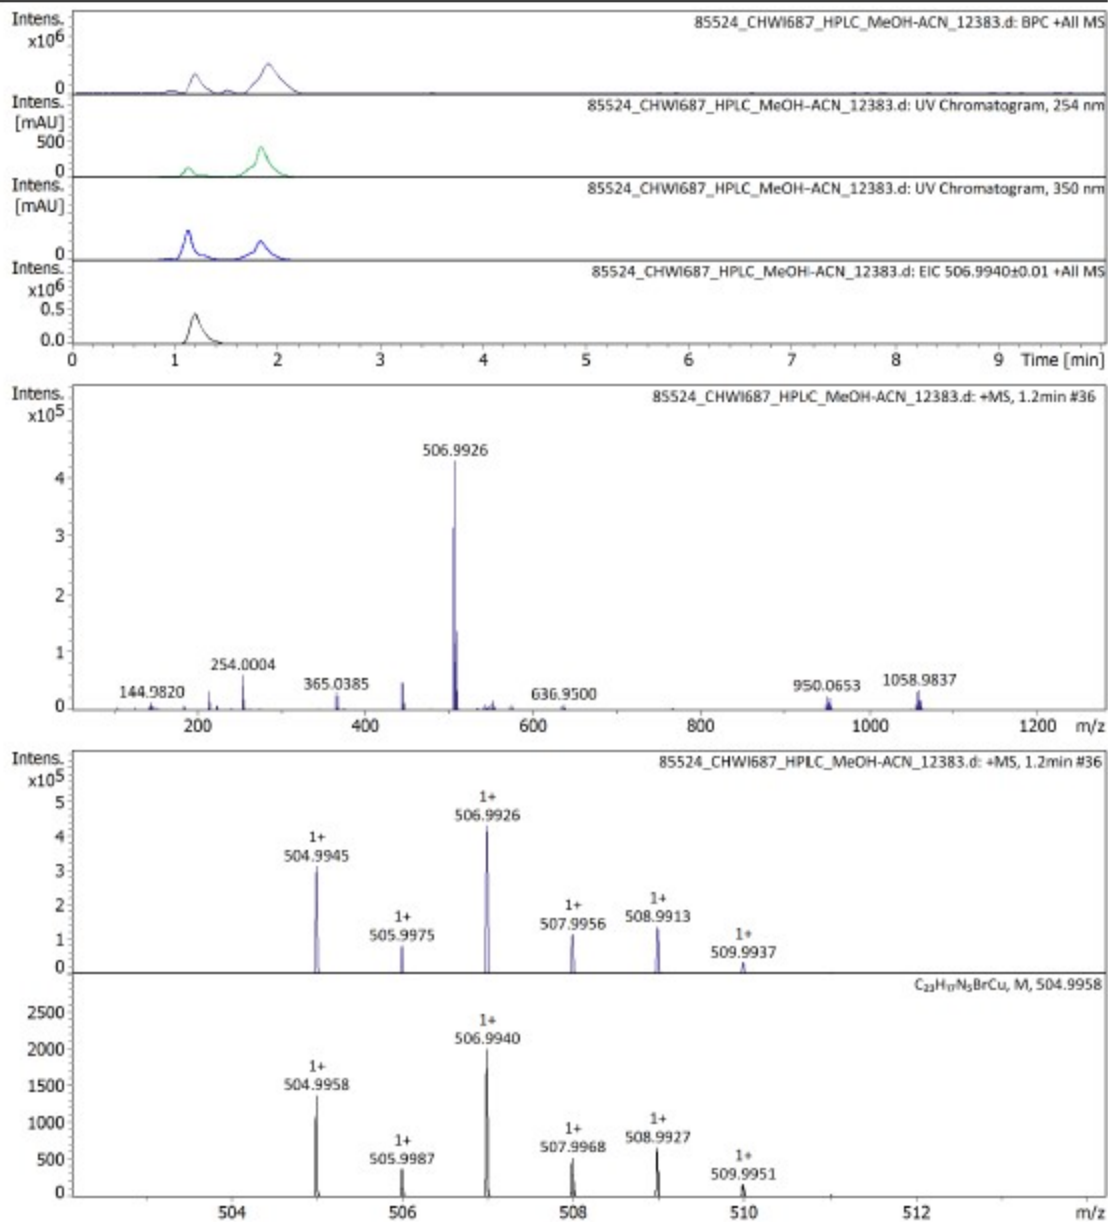

Figure S65. ESI mass spectrum of 3 in positive ion mode.

## Generic Display Report

**Analysis Info** Acquisition Date 09/12/2021 11:59:48  
Analysis Name W:\MS\_MessService\85518000001-85526\_lc-ms\_Wittmann\85523\_CHWI686\_HPLC\_MeOH-ACN\_12381.d  
Method lc-ms1\_r50-1900\_isocrat50meoh-acn\_300ulmin\_10min\_pos\_wittmann.m Operator msc  
Sample Name 85523\_CHWI686\_HPLC Instrument maXis  
Comment

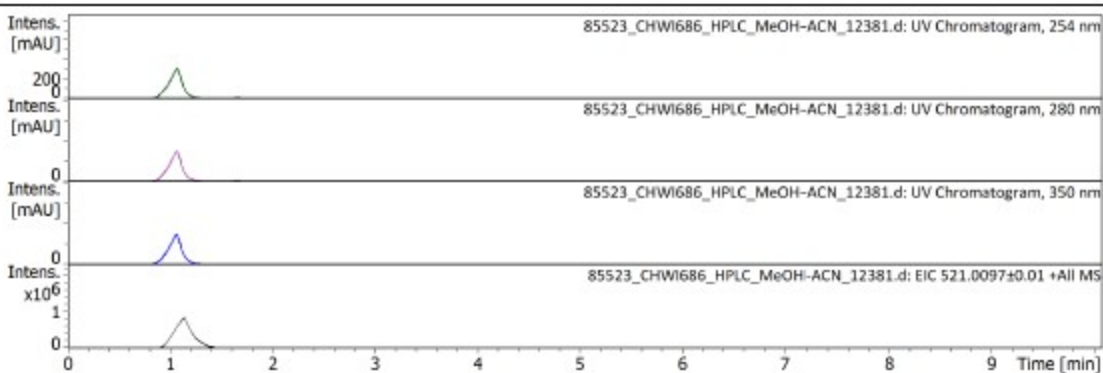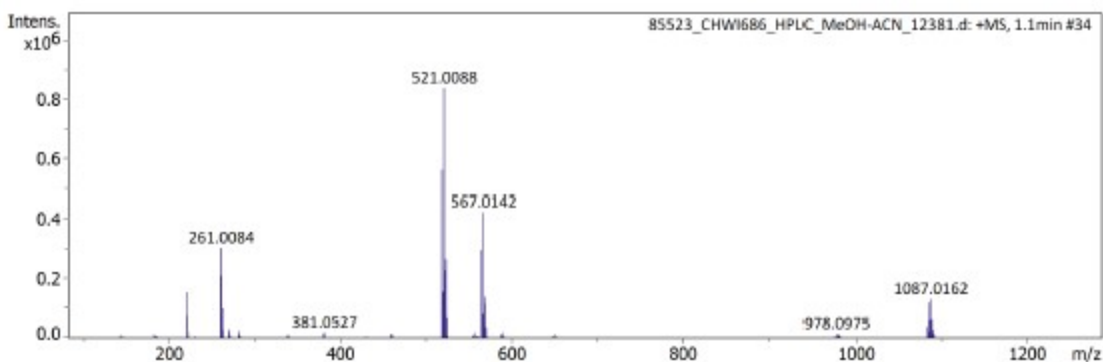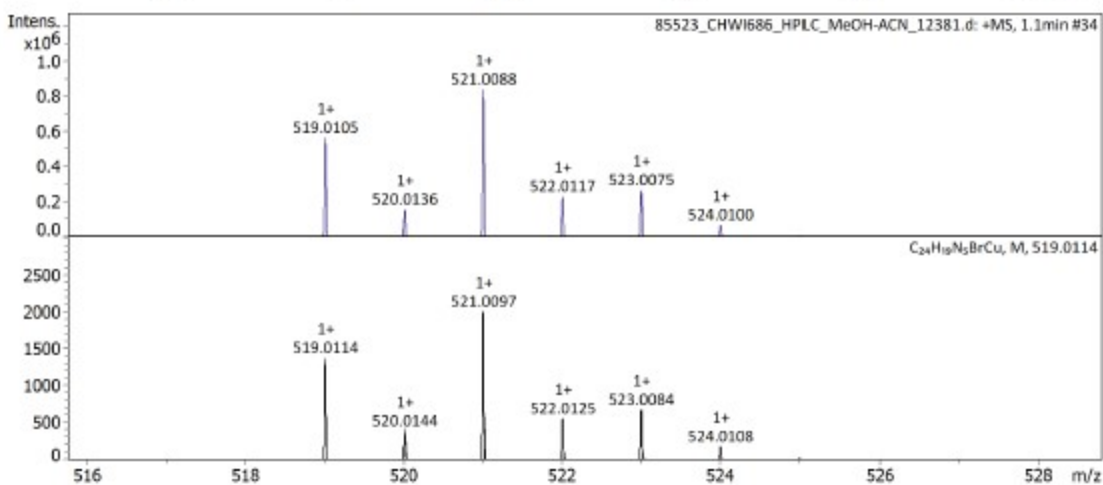

Figure S66. ESI mass spectrum of 4 in positive ion mode.

## Generic Display Report

### Analysis Info

|               |                                                                               |                  |                       |
|---------------|-------------------------------------------------------------------------------|------------------|-----------------------|
| Analysis Name | D:\Data\MS_Service_MSC_Archiv_2022_861_939\928\92885_CHWI 1059 pree_amazon2.d | Acquisition Date | 11/9/2022 12:16:10 PM |
| Method        | MSC-Service_direct-injection.m                                                | Operator         | MSC                   |
| Sample Name   | 92885_CHWI 1059 pree_amazon2                                                  | Instrument       | amaZon speed ETD      |
| Comment       | Wittmann / AOC<br>ACN / MeOH +1% H2O                                          |                  |                       |

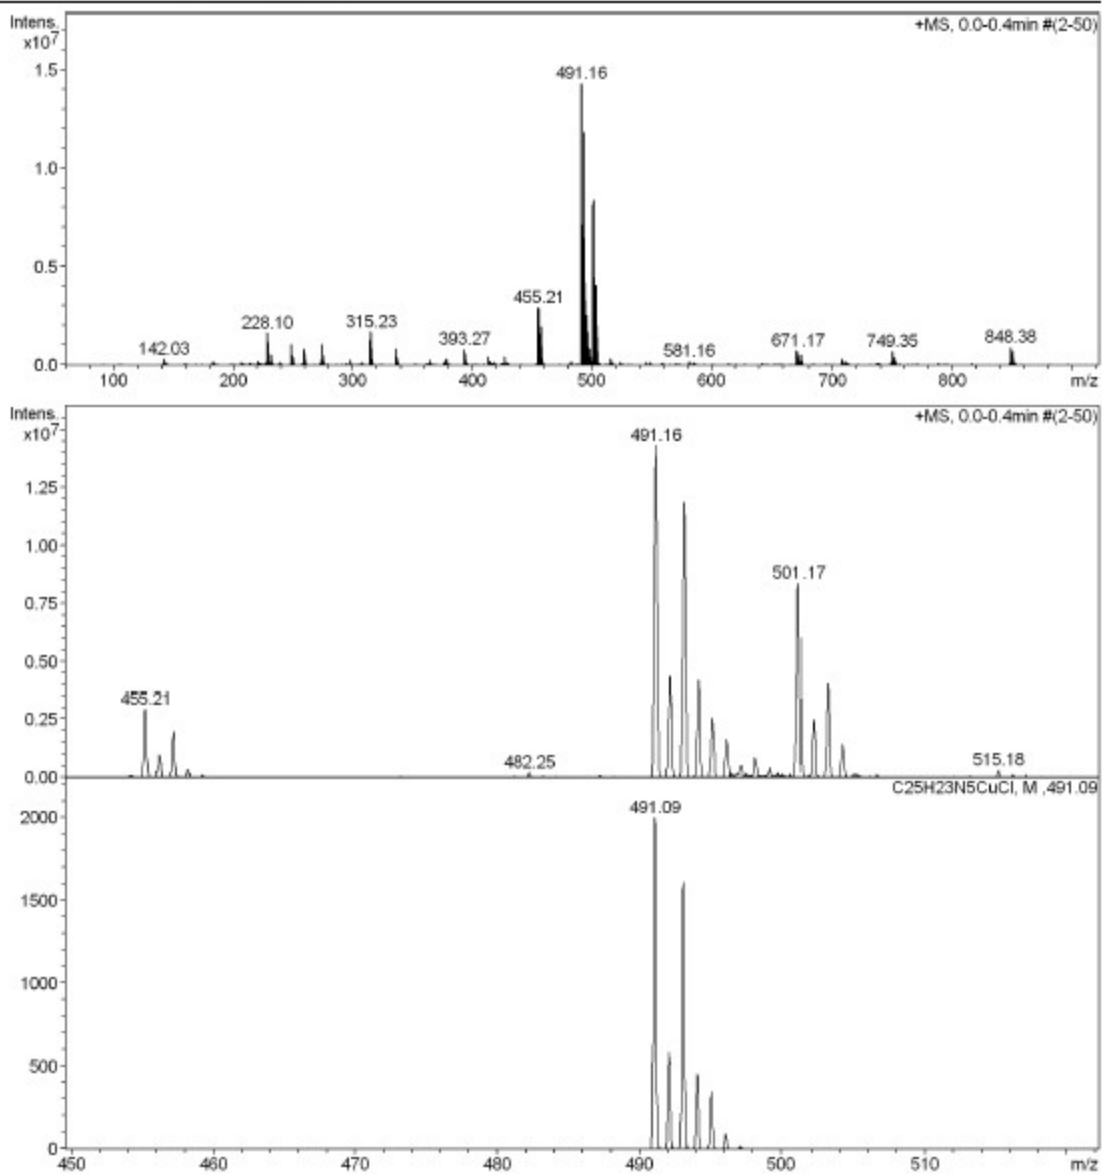

Figure S67. ESI mass spectrum of 5 in positive ion mode.

## Generic Display Report

### Analysis Info

|               |                                                                        |                  |                       |
|---------------|------------------------------------------------------------------------|------------------|-----------------------|
| Analysis Name | D:\Data\MS_Service_MSC_Archiv_2022_861_939\928\92886_RIUR 10_amazon2.d | Acquisition Date | 11/9/2022 12:28:08 PM |
| Method        | MSC-Service_direct-injection.m                                         | Operator         | MSC                   |
| Sample Name   | 92886_RIUR 10_amazon2                                                  | Instrument       | amaZon speed ETD      |
| Comment       | Wittmann / AOC<br>ACN / MeOH +1% H2O                                   |                  |                       |

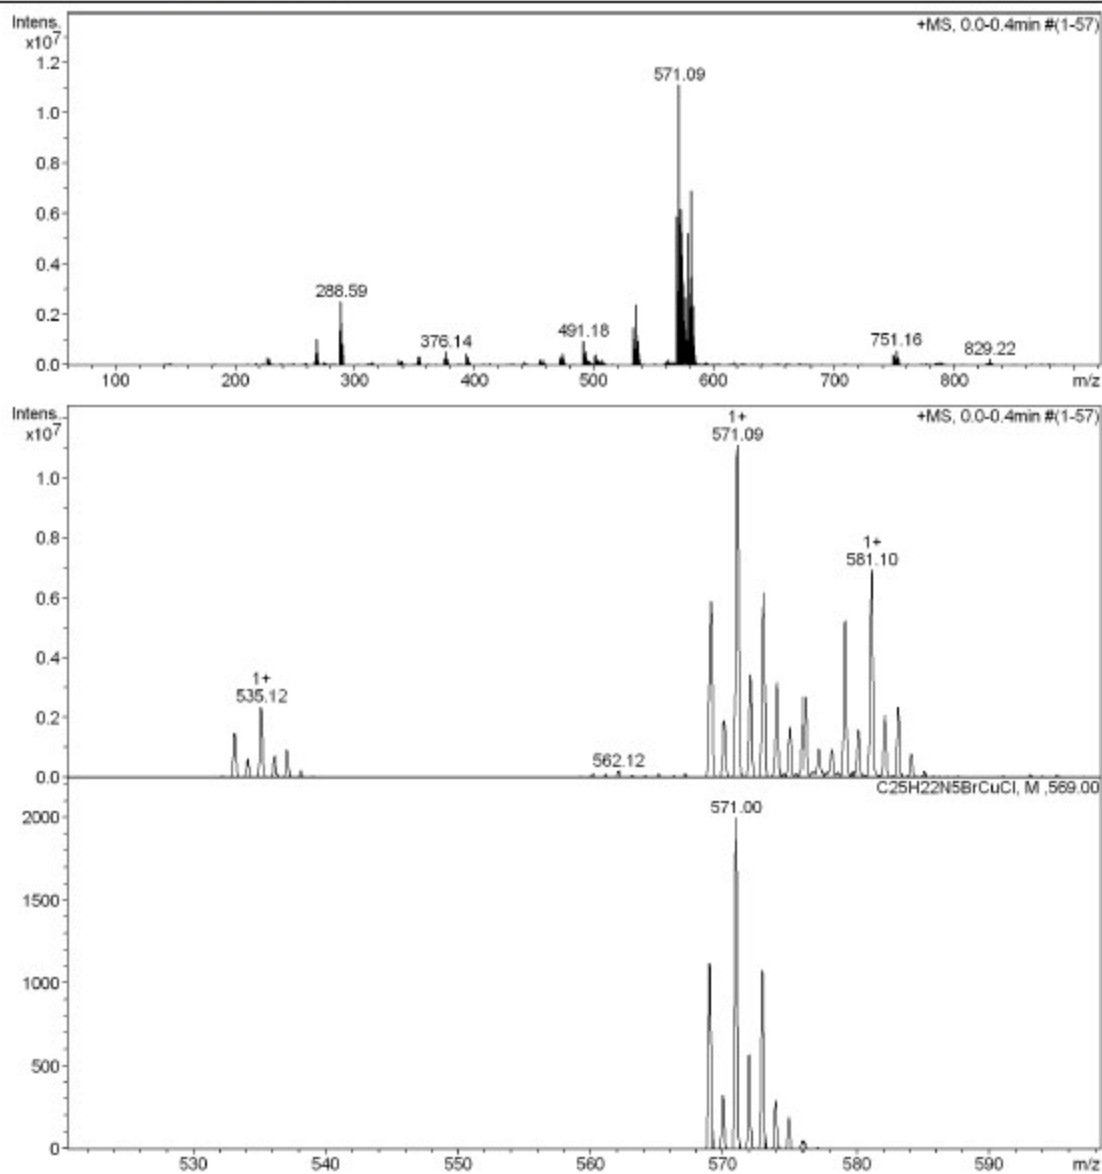

**Figure S68.** ESI mass spectrum of **6** in positive ion mode.

- **References**

1. Putey, A., Joucla, L., Picot, L., Besson, T. & Joseph, B. Synthesis of latonduine derivatives via intramolecular Heck reaction. *Tetrahedron* 2007, **63**, 867–879.
2. Ravelli, R. B. G. *et al.* Insight into tubulin regulation from a complex with colchicine and a stathmin-like domain. *Nature* 2004, **428**, 198–202.
